# Supplementary material for: Examining the relationships between body image, eating attitudes, BMI, and physical activity in rural and urban South African young adult females using structural equation modeling
Source: PLoS One. 2017 Nov 16;12(11):e0187508. doi: 10.1371/journal.pone.0187508 (PMC5690598; doi:10.1371/journal.pone.0187508)
Supplement: S1 Dataset — (XLS) [file pone.0187508.s001.xls]

## Sheet: Sheet1
study	decage	CurrentPreg	ses	nts_css4s7_best	nts_css4s7_worst	nts_css4s7_clumsy	nts_css4s7_more_respect	nts_css4s7_less_respect	nts_css4s7_strongest	nts_css4s7_weakest	nts_css4s7_happiest	nts_css4s7_unhappy	Feel	Ideal	nts_css4s8_family_look	nts_css4s8_friends_look	nts_css4s9_rather_look	nts_css4s10_overweight	nts_css4s10_avoid_eat	nts_css4s10_think_food	nts_css4s10_binges	nts_css4s10_small_pieces	nts_css4s10_calorie	nts_css4s10_high_carbs	nts_css4s10_ate_more	nts_css4s10_vomit	nts_css4s10_guilty	nts_css4s10_thinner	nts_css4s10_burn	nts_css4s10_too_thin	nts_css4s10_body_fat	nts_css4s10_longer_eat	nts_css4s10_sugar	nts_css4s10_diet_food	nts_css4s10_control	nts_css4s10_self_control	nts_css4s10_presure_eat	nts_css4s10_food_thought	nts_css4s10_sweets	nts_css4s10_dieting	nts_css4s10_empty	nts_css4s10_rich_food	nts_css4s10_need_vomit	standheightm	nts_css7s3_weight	bmi	total_vig_mins_wk	total_mod_mins_wk	total_mvpa_min_wks
1	21.9494	0	6	2	9	8	4	1	5	1	3	9	3	4	5	3	1	2	0	0	0	0	3	0	3	0	0	0	0	0	0	0	0	0	2	0	0	0	0	0	0	0	0	1.733	66.4	22.1091	0	1340	1340
1	20.742	0	5	1	9	9	3	7	2	8	3	9	3	2	5	3	1	3	0	0	0	0	0	0	0	0	0	0	0	0	2	2	0	0	0	2	0	3	1	0	0	0	0	1.697	70.2	24.3766	60	200	260
1	22.7159	0	5	3	8	9	4	1	7	1	4	8	3	4	4	4	1	0	3	0	0	0	0	3	0	0	0	0	0	0	0	0	0	0	0	0	0	0	2	0	0	0	0	1.502	47	20.8333	0	2640	2640
1	21.1389	0	3	3	1	9	6	1	8	1	3	8	3	3	9	6	1	3	0	0	0	0	3	0	0	0	0	0	0	0	0	0	0	0	0	0	0	0	0	0	1	0	0	1.583	51.9	20.7112	0	140	140
1	21.9165	0	5	3	8	1	2	5	4	1	6	9	3	3	4	3	9	0	0	3	0	0	3	0	0	0	0	0	0	0	0	0	0	0	0	3	0	0	0	0	0	3	0	1.654	47.5	17.3629	360	630	990
1	23.0773	0	9	6	9	8	4	1	6	1	5	2	6	6	6	5	1	0	0	0	3	1	0	0	0	0	0	0	0	0	0	0	0	0	0	0	0	0	0	0	0	0	0	1.61	84.2	32.4833	0	400	400
1	23.0828	0	6	2	8	9	3	1	7	1	4	9	3	2	2	2	1	3	0	0	2	0	0	0	0	0	0	0	1	0	0	0	0	0	0	0	0	0	0	0	0	2	0	1.565	68.7	28.0497	0	1860	1860
1	23.1403	0	4	6	1	9	8	5	9	2	7	8	4	6	9	5	9	0	0	0	0	0	0	0	0	0	0	0	0	0	0	0	0	0	1	3	0	0	0	0	0	0	0	1.682	69.2	24.4599	240	1720	1960
1	23.2635	0	3	2	8	9	9	1	7	2	7	8	6	3	6	5	1	2	0	3	0	3	3	3	3	2	3	3	0	0	2	3	3	0	1	0	0	0	0	0	0	2	0	1.576	62.5	25.1633	60	2130	2190
1	22.8802	0	6	3	1	9	3	9	9	1	3	9	3	3	3	3	1	3	0	0	2	3	0	0	0	0	0	0	0	0	0	0	0	0	1	1	1	0	0	0	2	0	0	1.629	59.7	22.4974	0	2980	2980
1	21.128	0	4	5	8	9	3	9	2	8	4	9	6	4	3	2	1	3	0	0	0	0	3	0	0	0	0	0	2	0	0	0	0	0	1	3	0	0	0	0	0	0	0	1.522	68.6	29.6138	40	2040	2080
1	22.5927	0	6	4	9	8	5	1	4	1	4	8	3	3	3	3	9	0	0	0	0	0	1	0	0	0	0	0	0	0	0	0	1	0	0	0	0	0	0	0	0	0	0	1.592	51.8	20.4382	40	3360	3400
1	21.0541	0	2	4	1	9	6	1	5	1	4	1	3	4	4	4	1	3	0	0	0	0	3	0	0	0	0	0	0	0	0	0	3	0	0	3	1	0	3	0	0	3	0	1.614	52.8	20.2687	0	1470	1470
1	19.2498	0	5	5	8	1	5	2	8	1	7	5	5	6	6	4	1	0	0	0	2	1	0	0	3	0	0	0	3	0	0	3	3	1	3	2	0	3	0	0	0	0	0	1.558	61.2	25.2125	20	3420	3440
1	19.7509	0	6	8	9	6	7	1	8	1	5	9	4	5	6	4	9	0	0	0	0	0	3	2	0	0	0	0	0	0	0	0	0	0	1	3	0	0	0	0	0	2	0	1.613	58.9	22.6384	60	660	720
1	20.1697	0	6	3	8	9	2	1	3	1	4	9	3	5	5	5	1	0	0	0	0	3	3	1	0	0	0	0	2	0	0	0	0	0	0	2	0	0	0	2	0	3	0	1.678	52.5	18.6456	120	2970	3090
1	21.0048	0	5	4	9	8	3	2	9	1	5	8	5	5	5		9	0	0	0	1	0	0	0	3	0	0	0	0	0	0	0	0	0	0	0	0	0	0	0	0	3	0	1.691	83.6	29.2361	240	2420	2660
1	21.9165	0	6	4	8	9	8	1	7	8	6	8	4	4	4	4	1	0	0	0	3	0	0	0	0	0	0	0	0	0	0	0	0	0	3	3	0	0	0	0	0	0	0	1.558	53.9	22.2052	0	2940	2940
1	22.6201	0	2	3	9	1	5	4	8	2	7	1	7	6	4	5	1	3	0	0	0	3	0	0	0	0	0	0	0	0	0	0	0	0	0	0	0	3	0	0	0	0	0	1.587	84.6	33.5905	240	940	1180
1	22.8747	0	5	4	8	9	5	1	3	2	4	8	5	5	4	5	9	0	0	0	0	0	3	0	3	0	0	2	0	0	0	0	0	0	0	3	0	0	0	0	0	2	0	1.622	63.3	24.0604	180	750	930
1	21.3196		5	2	8	9	3	9	4	9	1	7	2	2	2	2	1	3	0	0	0	0	0	0	0	0	0	2	3	2	2	0	0	0	0	0	0	0	0	1	0	0	0	1.601	52.7	20.5602	326	690	1016
1	21.1581	0	9	5	9	1	5	1	9	1	5	1	7	5	7	7	9	0	0	0	0	0	2	0	0	0	0	0	3	0	0	3	0	0	0	3	0	0	0	3	3	0	0	1.646	117.3	43.2951	0	1200	1200
1	22.3737	0	7	3	9	1	6	1	4	1	3	9	3	4	5	2	1	3	0	0	0	0	3	0	0	0	0	0	0	3	0	0	3	0	3	3	2	0	1	0	1	3	0	1.623	50.9	19.3233	0	1560	1560
1	21.1335	0	6	4	1	8	7	9	1	9	4	8	4	3	8	3	1	0	0	2	3	0	3	0	0	0	0	0	0	3	0	0	0	0	3	0	0	0	0	0	0	0	0	1.628	57.8	21.8082	0	1275	1275
1	23.3539	0	7	5	1	7	9	2	3	6	9	2	9	5	5	3	1	2	0	0	0	0	0	3	0	0	0	0	0	1	0	0	0	0	3	2	0	0	0	0	0	0	0	1.654	96.9	35.4203	2100	140	2240
1	20.0767	0	4	3	8	9	9	1	8	1	5	8	2	5	5	1	1	0	0	0	3	0	1	0	0	0	0	0	0	2	0	0	0	0	0	0	0	0	2	0	0	3	0	1.697	61.5	21.3556	0	2020	2020
1	19.9699	0	7	5	9	1	2	6	8	1	6	1	3	3	4	3	1	0	2	0	0	2	2	1	0	0	0	0	0	2	0	2	2	0	0	3	0	2	2	0	0	0	0	1.593	49	19.3092	240	1820	2060
1	22.6201	0	5	4	1	9	5	2	6	8	4	9	4	4	4	4	1	3	0	3	2	0	0	0	2	0	0	0	0	0	0	0	0	0	0	0	0	3	0	0	0	0	0	1.556	59.1	24.41	840	1940	2780
1	23.2197	0	2	4	9	8	5	9	4	1	3	9	9	4	6	6	1	3	0	0	0	2	3	0	0	0	0	0	3	0	0	2	0	0	0	3	0	0	0	0	0	2	0	1.663	107	38.69	0	1950	1950
1	22.757	0	7	5	9	1	2	4	3	7	6	5	5	4	3	3	1	3	0	0	0	0	1	0	2	0	0	0	0	0	0	0	0	0	0	3	0	0	0	0	0	0	0	1.66	93.3	33.8583	960	55	1015
1	23.1896	0	5	1	8	9	2	6	2	9	1	9	2	2	3	2	1	3	0	0	0	0	3	0	0	0	0	0	3	0	0	0	0	0	0	2	0	0	0	0	0	3	0	1.607	51	19.7487	0	56	56
1	22.8912	0	6	3	9	7	8	1	4	6	4	1	3	2	2	2	1	0	1	3	3	0	1	0	0	0	0	0	3	3	0	0	0	0	0	3	0	0	0	0	0	0	0	1.738	83.3	27.5769	0	2980	2980
1	23.0198		3	4	9	9	5	8	5	1	3	9	5	3	5	4	1	0	1	0	0	0	3	0	0	0	2	1	0	3	0	0	3	0	3	3	0	0	0	0	1	3	0	1.656	65.7	23.9577	2100	2730	4830
1	20.1287	0	5	5	1	9	8	3	7	1	5	2	2	4	5	6	1	0	1	0	1	3	1	3	3	0	0	0	0	2	0	3	0	3	2	3	0	1	0	2	0	0	0	1.503	39.8	17.6183	2940	240	3180
1	22.8802	0	4	3	1	9	5	1	6	8	4	1	3	4	3	3	9	0	0	0	0	0	3	0	0	0	0	0	0	0	0	0	0	0	0	0	0	0	3	0	0	0	0	1.566	53.5	21.8158	0	2400	2400
1	21.0897	0	9	3	9	7	4	8	9	4	3	9	3	3	3	3	1	3	0	3	3	0	3	0	0	0	0	0	3	0	3	0	3	0	0	3	3	0	3	0	0	0	0	1.651	73.1	26.8178
1	21.6537		8	4	1	9	3	1	8	1	4	1	7	4	4	4	9	0	0	0	2	1	0	0	0	0	0	0	0	0	0	0	0	0	0	0	0	0	0	0	0	3	0	1.593	79.4	31.2888
1	22.7077	0	10	3	2	1	3	9	8	1	3	9	4	4	4	5	9	0	0	0	0	0	3	0	0	0	0	0	0	0	0	0	0	2	0	0	0	0	0	0	0	0	0	1.682	67.6	23.8943
1	22.4285	0	4	3	1	9	4	8	4	2	4	8	2	4	5	3	9	0	0	0	0	2	3	0	0	0	0	0	0	0	0	0	0	0	0	3	0	0	0	0	0	3	0	1.626	53.1	20.0841	210	510	720
1	19.9863	0	3	1	8	7	9	2	9	2	4	3	3	1	2	3	1	3	2	0	0	0	3	0	3	0	0	0	3	1	0	0	3	0	3	0	0	0	3	0	0	2	0	1.666	67.6	24.3555
1	20.7584	0	5	2	9	8	5	1	7	3	8	9	5	2	1	2	1	1	0	2	2	2	0	0	0	0	0	0	3	0	0	1	0	0	0	0	0	1	0	0	0	3	0	1.568	73	29.6914	0	3330	3330
1	21.5989	0	2	7	1	8	9	2	8	1	8	1	5	2	3	5	1	3	0	0	0	3	0	0	0	0	0	3	0	3	0	0	0	0	0	3	0	0	0	0	0	0	0	1.636	61.1	22.8284	900	910	1810
1	22.9925	0	7	3	8	1	5	9	7	1	4	6	3	4	4	3	1	3	0	0	0	0	3	0	0	0	0	0	3	0	0	0	0	0	3	3	1	3	3	3	0	0	0	1.6	61.5	24.0234	400	1725	2125
1	19.9671	0	5	5	9	8	4	1	4	1	5	1	3	5	5	5	1	3	0	0	0	0	3	0	0	0	0	0	0	0	0	0	2	0	1	3	0	0	0	0	0	3	0	1.569	61.3	24.9009	210	1210	1420
1	19.6331	0	5	3	9	2	5	1	8	1	7	1	2	3	6	7	9	3	0	0	0	0	3	3	0	0	3	0	3	0	3	0	2	0	3	3	0	0	0	3	0	0	0	1.774	53.9	17.127	840	600	1440
1	23.0116	0	9	5	9	1	6	1	5	1	6	1	6	5	5	5	1	3	2	0	0	2	1	0	0	0	0	1	3	0	1	0	1	3	1	1	0	0	1	3	1	0	0	1.608	82.8	32.0227	0	3375	3375
1	23.2498	0	9	4	9	9	4	1	6	3	6	2	4	4	3	8	1	0	0	3	0	0	0	0	3	0	0	0	3	0	3	0	0	0	0	3	0	0	0	0	3	0	0	1.633	57.1	21.4123
1	23.2197	0	6	2	1	9	4	8	9	3	7	6	7	5	9	3	1	3	0	3	0	0	0	0	0	0	0	3	0	0	0	3	0	0	0	1	0	0	0	0	0	0	0	1.595	100.2	39.3864	960	2565	3525
1	19.4415	0	8	2	8	5	1	7	3	8	1	8	3	2	2	1	1	3	0	0	0	0	2	0	0	0	0	1	0	0	0	3	0	0	3	0	3	0	0	3	0	0	0	1.563	58.1	23.7825	120	2580	2700
1	19.9535	0	8	3	7	8	3	7	8	1	5	8	5	3	3	8	1	1	0	0	0	0	3	0	0	0	0	0	0	0	0	0	0	0	3	3	0	2	0	0	0	0	0	1.602	79.1	30.8213	240	670	910
1	19.7071	0	5	5	3	9	1	8	5	1	3	9	1	2	4	4	1	1	0	0	0	1	3	0	0	0	0	0	0	3	3	3	0	0	1	0	3	3	0	0	0	0	0	1.644	50.6	18.7218	960	240	1200
1	19.5866	0	4	4	5	9	3	2	1	8	5	1	5	4	1	5	1	3	0	0	0	3	3	0	0	0	0	2	0	0	3	0	0	0	3	0	2	0	0	0	0	3	0	1.561	58.4	23.9666	1320	435	1755
1	21.3032	0	4	9	2	8	9	4	7	2	1	5	7	4	1	6	1	0	0	0	0	0	0	0	0	0	0	0	0	0	0	3	0	0	0	0	0	0	0	0	0	3	0	1.673	77.8	27.7963	720	2520	3240
1	22.2587		5	5	5	8	6	2	9	1	3	7	3	5	4	5	1	3	0	0	0	0	0	0	0	0	0	0	0	3	0	0	0	0	0	3	3	0	0	0	0	0	0	1.665	56.6	20.4168	1500	110	1610
1	20.5394	0	8	3	8	9	5	1	9	2	1	8	3	2	4	1	1	0	2	0	0	0	3	2	0	1	0	0	0	0	1	0	0	0	3	3	1	0	0	0	0	3	0	1.74	72.4	23.9133	0	1330	1330
1	22.7351	0	8	3	9	2	6	9	3	1	3	9	6	3	2	5	1	3	1	0	0	0	0	0	0	0	0	3	0	0	0	0	0	0	0	1	0	0	0	0	0	0	0	1.77	94.8	30.2595	0	840	840
1	21.6345	0	5	4	8	9	2	8	1	7	8	1	4	4	4	4	1	3	0	0	1	0	0	0	2	0	0	0	0	3	0	2	0	0	2	0	2	0	0	0	0	0	0	1.616	55.7	21.3291	0	780	780
1	22.3244	0	6	2	9	7	3	1	4	5	4	6	3	3	4	3	1	2	3	0	1	0	3	2	0	0	0	0	1	0	2	0	2	3	3	0	2	0	3	2	0	0	0	1.541	50.9	21.4345	120	750	870
1	22.2396	0	5	5	4	9	6	1	7	1	5	2	5	5	5	5	1	2	0	0	0	0	3	0	0	0	0	0	0	0	0	0	0	0	0	3	0	0	0	0	0	3	0	1.635	59.2	22.1455	930	160	1090
1	20.0356	0	5	4	8	5	1	5	9	1	3	8	3	4	6	4	1	0	0	0	0	0	3	0	0	0	0	0	3	0	0	0	0	0	0	3	0	0	0	0	0	0	0	1.505	48.8	21.545
1	22.7625	0	1	2	8	9	3	1	4	4	7	5	7	1	4	1	1	0	1	0	0	0	0	0	0	0	0	0	0	0	3	0	0	0	1	0	0	0	0	0	0	0	0	1.554	68.3	28.2826	1260	180	1440
1	21.4976	0	2	3	8	1	7	1	9	1	5	4	5	4	2	3	1	3	0	0	0	0	1	0	0	0	0	0	1	0	0	0	0	0	0	0	0	0	1	0	0	0	0	1.626	77.5	29.313	0	2170	2170
1	22.7488	0	2	6	7	4	9	2	9	1	4	8	6	4	5	3	1	2	0	2	0	3	1	0	0	0	0	0	2	0	0	0	1	0	2	0	0	0	1	0	0	0	0	1.614	75.3	28.906	0	2580	2580
1	22.6694	0	5	7	8	9	4	1	6	2	6	1	3	4	6	4	1	3	1	0	0	0	1	0	0	0	0	0	0	0	3	0	0	0	0	3	1	0	0	0	0	0	0	1.551	71.2	29.5976	2940	500	3440
1	20.501	0	6	4	8	8	5	1	9	1	4	9	4	4	4	4	1	3	0	0	0	0	2	0	0	0	0	0	0	0	0	0	0	0	0	3	0	0	0	1	0	3	0	1.602	62.9	24.509	0	1560	1560
1	22.0151	0	4	2	9	9	5	1	6	3	3	1	6	3	3	3	1	1	3	0	2	0	3	0	1	0	3	0	0	0	0	0	0	0	0	0	0	0	0	0	0	0	0	1.623	96.6	36.6725	90	3024	3114
1	20.5038	0	5	4	8	1	9	2	8	2	4	8	4	5	4	4	9	0	0	0	0	0	0	0	0	0	0	3	3	0	0	0	0	0	0	3	0	0	0	0	0	0	0	1.576	59.1	23.7944	0	970	970
1	20.0137	0	9	9	1	2	9	1	5	1	9	1	7	8	9	9	9	0	0	0	1	0	3	0	0	0	0	0	3	0	2	0	0	0	0	0	0	0	0	0	0	0	0	1.586	73	29.0213	560	1120	1680
1	20.4326	0	7	4	9	9	5	1	3	1	4	1	3	4	4	5	1	3	0	0	0	0	0	0	3	0	0	0	3	3	3	0	0	0	0	0	0	0	0	0	0	0	0	1.713	60.4	20.5836	900	1740	2640
1	22.4805	0	5	3	8	9	7	1	9	1	4	9	2	4	6	6	1	0	0	0	0	0	3	0	0	0	0	0	0	3	0	0	3	0	0	3	0	0	0	0	0	0	0	1.566	47	19.1652	0	1890	1890
1	19.5291	0	7	3	9	8	5	1	4	1	3	9	3	3	4	3		3	0	0	0	0	0	0	0	0	0	0	0	0	0	0	3	3	0	3	0	2	0	3	0	1	0	1.68	54.6	19.3452	40	2040	2080
1	19.4442	0	5	4	1	9	5	7	8	1	5	1	4	5	4	3	1	1	0	0	0	0	0	0	0	0	0	0	0	0	2	0	0	0	0	0	0	1	0	0	0	0	0	1.548	51.6	21.5332
1	20.1752	0	7	2	8	3	5	1	7	1	2	9	2	2	2	1	1	0	0	0	0	0	0	1	0	0	0	0	0	0	0	0	3	2	0	3	0	2	0	0	0	0	0	1.592	59.1	23.3185	420	1920	2340
1	22.1629	0	6	3	9	5	8	1	4	2	4	1	3	3	3	3	1	0	0	0	1	0	0	0	0	0	0	0	3	2	0	2	0	0	0	0	2	0	0	0	0	2	0	1.534	46.4	19.7182
1	21.1389	0	7	3	8	9	5	8	6	1	5	4	3	4	4	5	1	2	0	0	0	0	1	0	0	0	0	0	1	0	0	0	0	0	0	0	0	0	0	0	0	0	0	1.607	52.4	20.2908	30	3422	3452
1	21.4483	0	8	5	1	8	8	1	8	2	1	8	8	8	1	8	9	0	0	3	3	3	0	0	0	0	0	0	0	0	0	3	3	0	3	2	2	0	3	0	0	3	2	1.621	131.1	49.8927	0	1550	1550
1	22.7242	0	8	5	6	7	2	8	9	1	5	9	3	3	3	3	1	0	0	0	0	0	0	0	0	0	0	0	0	0	0	0	0	0	3	0	0	0	0	0	0	0	0	1.765	74.7	23.979	60	3180	3240
1	22.9322	0	6	3	9	4	6	1	5	1	5	2	3	4	6	3	1	0	0	1	0	2	2	0	2	0	1	0	3	3	0	0	1	0	2	3	1	1	0	0	2	0	0	1.704	53.8	18.5286	2730	120	2850
1	22.6858		5	6	3	9	9	4	9	1	6	3	6	5	5	9	1	3	0	0	0	0	0	0	0	0	0	0	0	0	0	0	0	0	0	0	0	0	0	0	0	3	0	1.683	77.1	27.2199	220	2340	2560
1	23.2745	0	6	2	8	5	4	6	9	1	3	7	4	2	2	2	1	3	0	0	0	2	1	0	0	0	0	0	0	0	1	3	0	0	0	0	0	0	0	0	3	0	0	1.566	80.1	32.6625	210	1530	1740
1	21.5058	0	5	1	8	9	5	2	6	1	3	8	3	1	3	3	1	3	0	0	0	3	3	0	0	0	0	0	3	0	0	3	0	0	0	3	0	0	0	3	0	0	0	1.522	59.3	25.5991	0	1050	1050
1	22.0753	0	3	5	2	9	1	6	9	1	5	2	4	4	5	1	1	0	0	2	0	0	0	0	0	0	0	0	0	0	0	0	0	0	0	0	0	3	0	0	0	0	0	1.626	66.7	25.2281
1	22.3354	0	7	9	8	8	3	1	4	2	6	5	6	3	4	2	1	3	0	0	0	0	3	0	0	0	0	2	0	0	0	0	0	0	1	2	0	0	0	0	1	3	0	1.6	79.6	31.0938	930	960	1890
1	20.8214	0	6	3	8	1	7	5	9	1	3	8	3	3	7	3	9	0	0	3	1	0	0	0	0	0	0	0	0	2	0	0	0	0	0	2	0	0	0	0	0	0	0	1.64	54.1	20.1145	60	1280	1340
1	20.1314	0	4	7	5	8	3	1	7	1	8	9	5	5	3	3	1	3	0	0	0	0	0	0	0	0	0	0	0	0	0	0	0	0	0	0	0	0	0	0	0	0	0	1.683	68.8	24.2896	120	120	240
1	19.6331	0	6	2	9	3	5	1	2	9	3	9	3	3	4	4	1	3	0	0	0	0	1	0	0	0	0	0	0	0	0	0	0	0	0	3	0	1	0	0	0	0	0	1.503	46.5	20.5842
1	20.0082	0	7	3	9	5	2	6	8	1	4	5	3	3	3	3	1	0	0	0	2	3	2	0	3	0	0	0	0	0	2	2	0	0	2	0	0	3	0	0	0	0	0	1.666	77.7	27.9944
1	22.9103	0	5	4	9	1	5	1	8	1	4	9	7	5	3	3	1	3	0	0	0	2	3	0	0	0	0	0	3	0	0	0	0	0	3	3	0	0	0	3	0	0	0	1.689	75.1	26.3257	0	570	570
1	22.705	0	4	3	8	9	9	1	7	1	5	1	3	3	3	4	1	3	2	0	0	0	0	0	1	0	0	0	2	0	0	0	0	0	0	0	0	0	0	0	0	0	0	1.666	64.5	23.2386	360	2130	2490
1	22.9487	0	3	4	2	9	8	6	7	1	4	1	4	4	3	2	1	1	0	0	0	0	0	0	0	0	0	0	0	0	0	0	0	0	0	3	0	0	0	0	0	0	0	1.684	70.4	24.825	150	200	350
1	20.5366	0	6	3	8	8	6	1	9	1	3	1	4	4	4	4	1	3	0	0	0	0	0	0	0	0	0	0	1	0	0	0	0	0	0	0	0	0	0	0	0	0	0	1.996	57.5	14.4327	0	1290	1290
1	23.0308	0	7	3	3	8	3	9	3	1	8	1	6	3	3	3	1	3	0	0	0	0	0	0	0	0	0	0	0	0	3	0	0	0	0	0	0	0	0	0	0	0	0	1.503	96.9	42.8949	1320	660	1980
1	22.3546	0	6	3	9	7	4	1	9	1	5	2	3	4	3	3	9	1	0	0	0	0	0	0	0	0	0	0	1	0	0	0	0	0	2	0	0	0	0	0	0	0	0	1.458	56.3	26.4846	80	3500	3580
1	20.95	0	7	3	9	5	3	9	9	1	6	2	3	3	3	3	1	3	0	1	0	0	3	0	0	3	0	0	3	3	0	1	2	0	0	3	0	0	1	0	2	0	0	1.678	60.9	21.6288	0	2190	2190
1	22.6585	0	4	3	8	9	3	1	8	2	5	9	1	3	3	3	1	0	0	0	0	0	3	0	0	0	0	0	0	0	0	0	0	0	3	3	0	0	0	0	0	0	0	1.49	39.7	17.8821	0	1290	1290
1	21.6646	0	5	3	8	9	4	1	5	1	6	1	3	2	2	2	1	3	0	3	0	3	3	0	0	0	0	3	0	0	0	0	3	3	0	0	0	3	0	0	0	0	0	1.561	70	28.7271
1	22.7598	0	1	3	4	9	9	2	9	1	7	1	2	9	9	5	1	0	0	1	0	0	0	0	0	0	0	0	0	0	0	0	0	0	0	0	0	0	0	0	0	0	0	1.535	43.6	18.5042	840	83	923
1	22.6557	0	6	9	1	8	5	1	2	1	9	1	6	6	6	6	9	0	0	0	0	3	3	0	0	0	0	0	3	0	0	0	3	0	3	3	0	0	0	0	0	0	0	1.536	59.9	25.3889	0	2220	2220
1	22.9487		7	3	9	8	7	1	8	1	2	9	4	2	2	2	1	1	3	0	0	0	3	2	0	0	0	0	0	2	0	1	0	0	3	0	3	0	2	3	3	0	0	1.695	85.5	29.7596	0	2280	2280
1	21.4209	0	7	5	1	8	4	5	3	1	7	9	7	6	6	6	9	0	0	0	0	0	0	0	0	0	0	1	0	0	2	0	0	0	0	3	0	1	2	2	0	2	0	1.587	89.7	35.6155	60	510	570
1	21.5058	0	1	4	9	1	6	2	8	1	7	2	4	5	6	7	1	0	2	1	0	1	0	2	0	0	1	0	0	0	0	0	0	0	0	2	0	0	1	0	0	0	0	1.69	61	21.3578	0	270	270
1	21.755	0	4	3	8	9	8	1	6	9	3	1	1	5	5	5	1	3	0	0	0	1	0	0	0	0	0	1	0	0	0	0	0	0	0	0	0	0	1	0	0	0	0	1.655	49.6	18.1086	0	2730	2730
1	20.7556	0	2	8	4	4	9	2	3	1	5	9	8	3	6	5	1	3	0	0	0	0	0	0	0	0	0	0	0	0	3	0	0	0	0	3	0	0	0	0	0	0	0	1.673	84.4	30.1544	1260	270	1530
1	22.1985	0	7	3	9	8	5	1	7	1	4	9	5	3	5	3	1	3	0	2	0	0	0	0	0	0	0	3	0	0	0	0	0	0	3	0	0	3	0	0	0	3	0	1.705	81.9	28.1731	135	480	615
1	19.8467	0	12	2	9	8	5	2	7	1	3	4	4	1	5	1	1	3	1	0	0	0	3	0	0	0	0	0	0	0	0	0	0	0	0	0	0	0	0	0	0	0	0	1.526	56	24.048	15	3110	3125
1	22.5818	0	5	3	1	9	8	1	9	1	7	8	2	2	2	2	1	3	0	0	0	0	0	0	0	0	0	0	0	0	0	0	0	0	2	0	0	0	0	0	0	0	0	1.683	62.3	21.9948	0	1140	1140
1	19.8111	0	6	4	5	8	7	1	9	1	8	3	4	6	7	4	9	0	2	0	0	0	1	0	0	0	0	0	0	0	0	0	0	0	0	0	0	0	0	0	0	0	0	1.462	62.2	29.1002	750	170	920
1	22.0972	0	7	2	9	5	3	7	9	7	1	8	3	3	4	1	1	0	3	0	2	0	3	3	0	0	0	2	0	0	0	0	0	0	0	0	0	0	3	0	0	0	0	1.508	42.9	18.8649
1	21.5359	0	9	4	9	8	3	1	1	9	3	9	5	4	4	4	1	3	0	0	0	0	0	0	0	0	0	0	0	0	0	0	0	0	0	0	0	0	0	0	0	0	0	1.633	62.3	23.3623	0	540	540
1	20.3422	0	4	3	8	9	5	1	8	1	5	1	6	3	3	3	1	3	3	0	0	0	3	0	0	0	0	3	3	0	0	0	3	0	3	3	0	0	0	3	3	0	0	1.68	102.1	36.1749	0	3150	3150
1	22.5161		6	3	9	9	2	8	9	1	1	8	2	2	2	2	1	3	0	1	0	3	0	0	2	0	0	3	3	0	3	1	1	0	0	3	0	1	1	2	0	0	0	1.641	63.6	23.6178	0	2415	2415
1	22.8994	0	5	3	8	8	3	1	2	8	1	5	4	2	1	1	1	3	0	0	0	1	3	3	3	0	0	0	3	0	0	0	0	0	3	3	3	0	0	3	0	3	0	1.615	74.9	28.7168	0	1170	1170
1	22.5188	0	7	3	8	9	5	1	2	1	4	9	4	2	3	7	1	3	0	2	3	1	3	0	1	0	0	0	0	0	0	1	0	0	0	3	0	0	0	0	0	3	0	1.628	74.9	28.2601	360	1980	2340
1	22.9322	0	4	4	9	5	7	5	8	1	4	5	3	3	8	5	1	0	0	0	2	3	3	3	0	0	0	0	0	0	0	0	2	0	0	3	0	3	0	0	0	0	0	1.682	67	23.6822	120	4200	4320
1	20.7556	0	5	3	8	9	2	1	6	1	3	7	2	2	2	2	1	2	0	0	0	0	0	0	0	0	0	0	0	0	0	0	0	3	0	2	0	0	0	0	0	0	0	1.665	63.4	22.8697	0	4070	4070
1	21.7604	0	6	4	9	8	5	1	7	1	3	8	3	3	5	6	1	0	0	0	0	0	2	0	0	0	0	0	0	0	0	0	0	0	3	0	0	0	0	0	0	0	0	1.615	42.9	16.448	0	1008	1008
1	20.1643	0	5	4	7	9	4	1	8	1	4	5	9	6	4	1	9	0	0	0	0	0	0	0	0	0	0	0	0	0	3	3	0	0	0	3	0	0	0	0	0	3	0	1.642	88.4	32.7873
1	22.3436	0	4	4	9	8	4	5	3	1	4	1	5	3	5	3	1	0	0	0	0	0	0	0	0	0	0	0	0	0	0	0	0	0	0	3	0	0	0	0	0	0	0	1.538	61.5	25.9993	120	994	1114
1	21.6126	0	7	6	1	2	7	9	8	1	2	9	6	5	5	4	1	0	3	0	0	0	3	3	0	0	0	0	0	0	0	0	0	0	0	0	0	0	0	0	3	0	0	1.644	83.7	30.9686	60	210	270
1	21.3333	0	7	3	1	9	8	2	9	1	6	9	3	3	3	3	1	0	0	0	0	0	3	0	0	0	0	0	3	0	0	0	0	0	3	3	0	0	0	0	0	1	0	1.572	55.9	22.6207	0	990	990
1	22.8036	0	6	2	8	8	6	1	9	1	7	1	2	3	3	3	1	0	0	2	0	2	0	0	0	0	0	0	0	0	0	0	0	0	2	1	0	0	0	0	0	0	0	1.706	60	20.6155	120	2450	2570
1	21.7495	0	5	4	8	1	4	6	8	2	5	2	3	5	5	5	9	0	3	3	0	0	3	0	0	0	0	3	0	3	0	0	1	0	0	0	0	0	3	0	0	0	0	1.619	60.7	23.1577	300	70	370
1	21.4401	0	6	3	8	1	5	1	9	7	4	1	4	3	3	3	1	0	0	3	0	0	0	3	0	0	0	0	3	0	0	0	0	0	0	3	3	0	0	0	0	0	0	1.683	90.2	31.8448	30	980	1010
1	22.5517	0	7	5	8	9	6	1	9	1	5	1	7	4	5	6	1	3	0	0	0	1	3	0	0	0	0	2	0	0	3	0	0	0	2	3	0	0	0	0	0	3	0	1.683	100.9	35.6224	960	1170	2130
1	19.2635	0	5	5	9	8	1	2	3	1	4	9	3	3	3	3	1	0	2	0	0	0	3	0	0	0	0	0	3	0	0	0	3	0	0	3	0	0	0	0	0	0	0	1.618	56	21.391	1320	120	1440
1	20.1561	0	9	5	9	6	6	1	8	2	3	9	3	3	3	3	1	3	0	0	0	3	0	0	1	0	0	0	0	0	0	3	0	0	3	0	3	0	0	0	0	3	0	1.598	59.2	23.1829
1	21.5305	0	7	6	1	8	4	9	7	2	5	1	6	6	6	6	9	0	0	0	3	3	3	0	0	0	0	3	0	0	3	0	0	0	0	0	0	0	0	0	0	0	0	1.613	70.3	27.0201	180	1560	1740
1	22.4723	0	4	3	9	7	4	9	5	1	4	8	3	3	3	3	1	3	0	0	0	0	3	0	0	0	0	2	0	0	0	0	0	0	0	0	0	2	0	0	0	3	0	1.737	66.6	22.0737	150	1400	1550
1	22.4641	0	6	6	9	1	6	1	9	1	6	1		6	6	6	1	3	0	0	0	0	0	0	0	0	0	0	0	0	0	0	0	0	0	3	0	0	0	0	0	3	0	1.622	59.7	22.692	0	1310	1310
1	22.7762	0	6	7	1	9	6	8	5	2	6	3	4	4	4	4	9	0	2	3	0	0	3	0	0	0	0	0	0	0	0	3	2	0	3	3	0	0	1	0	0	0	0	1.547	54.2	22.6474
1	22.6256	0	5	3	8	9	2	1	9	1	4	8	4	4	5	6	1	3	0	0	0	0	2	0	0	0	0	0	0	0	0	0	0	0	0	3	0	0	0	0	0	0	0	1.701	68.6	23.7091	0	0	0
1	22.5544	0	4	5	2	7	2	7	1	7	4	6	3	9	3	3	9	0	0	0	0	0	0	0	0	0	0	0	0	0	0	0	0	0	0	0	0	0	0	0	0	3	0	1.515	43.1	18.7781	3	175	178
1	19.718	0	5	6	1	8	7	2	8	1	4	2	3	8	8	8	9	0	0	3	0	0	3	0	0	0	0	0	0	0	0	3	0	0	3	3	0	0	0	0	0	0	0	1.573	49	19.8033	420	1900	2320
1	21.6482	0	6	5	8	9	4	1	2	3	5	1	5	3	1	3	1	0	0	0	0	0	0	1	0	0	0	0	2	0	1	0	0	0	0	0	1	0	0	0	3	3	0	1.564	83.1	33.9725	60	1825	1885
1	20.7392	0	5	3	9	1	8	9	7	1	3	1	3	3	3	3	9	0	0	0	0	0	0	0	0	0	0	0	0	3	0	0	0	0	0	0	0	0	0	0	0	0	0	1.657	59.6	21.7071
1	21.87	0	5	7	9	1	3	6	5	4	5	9	7	4	7	4	1	3	0	0	0	1	0	0	0	0	0	0	0	0	0	0	0	0	0	3	1	2	0	0	0	3	0	1.625	83.4	31.5834	0	1530	1530
1	19.6578	0	6	4	8	7	6	8	9	1	4	8	4	1	1	1	1	3	0	0	0	0	3	0	0	0	0	0	3	0	0	0	0	3	0	3	0	0	1	3	0	0	0	1.618	56.4	21.5438
1	19.7974	0	6	3	1	9	6	2	5	7	8	4	4	3	7	5	1	3	2	0	0	3	0	0	0	0	0	0	3	0	3	0	0	0	3	2	1	0	0	0	0	3	0	1.775	60.4	19.1708	0	2660	2660
1	21.2047	0	4	4	9	6	7	1	8	1	4	1	3	4	4	4	9	0	0	0	0	2	0	0	1	0	0	0	0	0	0	0	0	0	0	0	0	0	0	0	0	0	0	1.691	63.4	22.1719	120	730	850
1	23.0144	0	6	3	4	7	6	8	7	2	1	9	3	4	6	2	1	3	0	0	0	0	0	0	0	0	0	3	0	0	0	0	0	0	0	3	0	0	0	0	0	0	0	1.625	54.9	20.7905	15	300	315
1	20.616	0	6	3	9	1	4	8	5	7	3	1	3	4	9	5	1	0	0	3	0	3	3	3	0	0	0	0	3	0	0	0	0	0	0	0	0	0	0	0	0	0	0	1.61	54.9	21.1797	0	1800	1800
1	23.0938	0	7	4	1	8	9	6	8	1	3	4	3	4	4	8	1	3	3	0	2	0	0	2	0	0	0	1	0	0	0	0	0	3	3	0	0	2	3	0	0	3	0	1.64	62.7	23.312	0	0	0
				5	5	7	4	2	6	9	7	1	2	5	5	5	9	0	0	0	0	0	0	0	0	0	0	0	0	0	3	0	3	0	0	3	0	0	0	0	0	0	0	1.585	55	21.8929
1	22.3491	0	1	3	8	6	4	1	8	9	5	8	2	3	5	3	1	0	0	0	0	0	0	0	0	0	0	0	0	3	0	0	0	0	0	2	0	0	3	0	0	0	0	1.568	49.4	20.0925
1	20.5229	0	4	3	9	8	1	2	2	1	4	9	7	3	3	3	1	3	0	0	0	0	3	0	0	0	0	0	3	0	0	0	0	0	0	0	0	0	0	3	0	0	0	1.58	88.2	35.3309	840	1365	2205
1	22.7762	0	6	3	9	8	3	4	3	1	3	1	4	3	3	2	1	3	0	0	0	0	2	0	0	0	0	0	0	0	1	0	0	0	0	2	0	0	0	0	0	0	0	1.511	62.2	27.2434	660	480	1140
1	19.5756		5	5	8	1	9	2	9	8	6	1	4	2	2	2	1	3	0	0	0	0	1	0	0	0	0	0	0	3	0	0	0	0	0	3	0	0	0	0	2	0	0	1.627	62.7	23.686
1	19.8768	0	5	3	9	1	8	9	7	1	3	1	3	3	3	3	9	0	0	0	0	0	0	0	0	0	0	0	0	0	0	3	0	0	0	0	0	0	0	0	0	0	0	1.657	59.6	21.7071
1	20.8624	0	5	5	9	8	2	7	9	1	3	1	5	3	3	3	1	1	0	0	1	0	0	0	0	0	3	3	0	0	0	0	0	0	3	1	0	0	0	0	0	0	0	1.722	94.2	31.7676	0	1215	1215
1	19.4908	0	7	8	1	9	9	1	8	1	1	9	5	5	4	5	1	3	0	0	2	0	0	0	0	0	0	0	0	0	0	0	0	0	3	3	0	0	0	0	0	0	0	1.591	57.5	22.7158	0	0	0
1	19.5565	0	7	6	9	8	5	1	8	1	3	1	4	3	6	2	1	3	0	0	0	0	0	0	1	0	0	0	0	0	0	0	0	0	2	3	0	0	0	0	0	0	0	1.611	57.5	22.1553	0	720	720
1	20.6379	0	7	4	8	9	1	9	9	1	4	9	6	4	4	4	1	3	0	0	0	0	3	0	0	0	0	0	0	0	0	0	0	0	0	3	0	0	0	0	0	3	0	1.677	105.7	37.5845	0	2460	2460
1	22.8063	0	5	4	9	6	9	1	3	8	4	9	4	4	4	5		3	0	0	0	1	0	0	0	0	0	0	0	0	0	0	0	0	0	0	0	0	0	0	0	0	0	1.661	63	22.835	60	1770	1830
1	22.6475	0	6	4	8	9	1	2	5	1	4	9	5	4	4	4	1	3	3	0	0	0	3	0	3	0	0	3	3	0	0	0	0	3	3	3	0	0	3	3	0	0	0	1.632	72.1	27.0704	300	1270	1570
1	21.0185	0	5	4	9	8	7	1	5	1	3	9	3	3	3	3	1	3	0	0	0	0	0	0	0	0	0	0	0	0	0	0	0	0	3	0	0	0	0	0	0	0	0	1.64	51.1	18.9991	240	300	540
1	23.0828	0	3	4	9	1	5	2	6	3	7	8	6	4	4	4	1	0	0	3	0	3	3	0	0	0	0	0	0	0	0	3	0	0	0	0	0	0	3	0	0	0	0	1.334	64.2	36.0764	720	880	1600
1	22.3244	0	7	6	1	8	7	5	4	1	3	8	5	4	4	4	1	3	0	0	1	2	3	0	0	0	0	0	0	0	0	0	0	0	0	3	0	0	0	0	0	0	0	1.587			0	165	165
1	22.2177	0	4	4	8	1	3	5	6	1	5	9	6	5	5	4	1	3	0	1	0	0	0	0	0	0	0	0	0	0	0	0	0	0	0	0	0	0	0	0	0	0	0	1.567	93.5	38.078	0	1760	1760
1	22.2888	0	5	2	8	1	5	9	7	3	6	1	4	2	3	2	1	0	2	2	0	0	0	3	0	0	0	0	0	0	0	0	0	0	3	3	0	0	0	0	0	0	0	1.535	57.4	24.361	360	540	900
1	20.4079	0	5	4	8	9	8	1	6	1	4	9	7	4	4	2	1	0	0	0	0	0	3	0	0	0	0	2	3	0	2	0	0	0	3	3	0	0	0	3	3	0	0	1.68	90.9	32.2066	0	1058	1058
1	22.2916	0	7	4	9	8	4	9	6	1	4	8	3	3	4	3	1	3	0	0	0	0	2	0	0	0	0	0	0	3	0	0	0	0	0	3	0	0	0	0	0	0	0	1.602	54.4	21.197	0	960	960
1	20.3313	0	6	4	9	9	3	1	5	1	3	9	2	1	4	3	1	3	0	2	2	0	3	0	0	0	0	2	3	0	0	0	0	0	0	1	0	0	0	0	2	1	0	1.662	59.3	21.4681	0	2250	2250
1	21.5195	0	10	3	7	9	4	1	9	1	4	9	6	3	3	3	1	3	0	1	0	0	0	0	0	0	0	0	0	0	0	0	0	0	0	3	0	0	0	0	0	0	0	1.691	80.5	28.152	0	630	630
1	22.7379	0	3	9	1	8	6	3	8	1	4	9	3	4	5	5	1	3	0	0	0	1	0	0	2	0	0	0	0	0	1	0	0	0	3	3	0	0	0	0	0	0	0	1.618	51	19.4811	0	390	390
1	22.4175	0	5	2	9	8	6	4	8	2	3	6	5	3	4	1	1	3	0	0	0	0	0	0	0	0	0	0	0	0	0	0	0	0	0	0	0	0	0	0	0	3	0	1.572	75	30.3498	60	980	1040
1	19.3758	0	5	3	1	9	5	1	6	1	3	9	3	3	3	3	9	0	0	3	2	0	0	0	0	0	0	0	0	2	0	2	0	1	0	3	3	0	2	0	0	2	0	1.555	58	23.9865	0	915	915
1	21.64	0	7	4	9	2	6	8	7	1	3	2	4	5	5	5	9	0	0	0	0	0	0	0	0	0	0	0	0	0	0	0	0	0	0	1	0	0	0	0	0	0	0	1.651	50	18.3432	360	2340	2700
1	20.9802	0	5	4	1	9	5	8	1	1	4	8	5	3	3	3	9	3	0	2	0	0	0	0	0	0	0	0	0	0	3	0	0	0	0	0	0	0	0	0	0	0	0	1.616	82.1	31.4384	1680	210	1890
1	22.5243	0	8	4	9	9	9	2	6	1	4	1	9	4	5	5	1	0	0	0	3	0	0	3	0	0	0	0	0	0	2	0	0	0	0	0	0	0	0	0	0	0	0	1.667	87.8	31.5954	30	2700	2730
1	22.6502	0	7	8	1	1	9	1	7	1	8	3	2	4	4	3	1	3	0	0	0	0	0	0	1	0	0	0	0	3	0	0	1	0	3	0	0	3	0	3	0	2	0	1.67	55.6	19.9362	1260	510	1770
1	20.4463	0	6	3	9	9	1	2	4	1	7	2	4	3	2	3	1	0	0	0	0	0	0	0	0	0	0	0	0	0	0	3	0	0	0	3	0	1	0	0	0	0	0	1.564	65.4	26.7365	60	1440	1500
1	22.9651	0	7	3	9	8	9	1	3	8	2	8	7	5	4	4	1	3	0	0	0	0	1	2	0	0	0	0	0	0	0	3	0	0	0	0	0	1	0	0	0	0	0	1.665	96.3	34.7374	820	3030	3850
1	22.0999	0	9	3	9	9	3	1	6	1	3	9	3	3	3	3	1	3	2	0	0	0	0	0	0	0	0	0	1	0	2	0	0	0	1	3	0	0	0	0	0	0	0	1.717	65.7	22.2856	135	2940	3075
1	21.4867	0	7	2	9	9	3	1	4	1	2	1	6	2	3	3	1	3	0	1	3	0	0	0	0	0	0	0	0	0	0	0	0	0	2	0	0	2	0	0	0	3	0	1.675	84.1	29.9755	0	2140	2140
1	22.245	0	8	3	1	9	5	9	7	1	5	1	7	4	4	5	1	1	0	1	0	0	2	1	0	0	0	3	2	0	3	0	3	0	2	2	1	0	3	0	0	0	0	1.661	98	35.5211	0	300	300
1	22.4887	0	6	5	9	8	5	1	8	1	5	1	4	5	4	4	1	0	0	0	0	0	0	0	0	0	0	0	3	0	0	3	3	0	0	3	3	0	0	0	0	3	0	1.605	61.3	23.7964	0	2880	2880
1	20.9774	0	7	4	1	9	6	2	8	2	9	1	6	4	3	3	1	2	0	0	0	3	1	0	0	0	0	0	3	0	0	0	0	0	0	0	0	0	0	0	0	3	0	1.627	70.7	26.7082	480	2590	3070
1	21.2211	0	7	4	8	1	3	7	9	1	3	8	3	4	5	4	1	3	0	0	0	2	3	2	1	0	0	0	0	2	0	2	0	0	0	0	0	0	0	0	1	0	0	1.739	69.8	23.0811	189	1890	2079
1	22.7242	0	5	4	9	1	6	9	5	1	3	1	3	4	3	3	1	0	0	0	0	0	1	0	0	0	0	0	0	0	0	0	0	0	0	2	0	0	0	0	0	0	0	1.576	53.7	21.6203	840	2520	3360
1	20.334	0	2	2	9	9	8	1	9	1	2	9	3	2	2	2	1	3	2	0	0	0	2	0	0	0	0	2	2	0	0	0	0	1	0	3	0	0	0	0	0	0	0	1.605	56.5	21.933	2590	525	3115
1	23.1376	0	5	5	9	7	4	1	7	1	4	9	7	5	5	5	9	0	0	0	0	3	1	0	1	0	0	0	2	0	3	3	1	0	0	2	3	3	2	0	2	0	0	1.645	101.6	37.5458	120	335	455
1	21.4867	0	8	5	1	8	7	2	6	1	6	3	4	5	7	5	9	3	0	0	0	0	3	0	0	0	0	2	2	0	0	0	3	0	3	2	0	0	3	0	0	0	0	1.501	49.9	22.1482	0	2420	2420
1	22.883	0	6	5	8	9	5	9	3	9	5	9	5	3	3	3	1	3	1	0	0	0	0	0	0	0	0	0	3	0	0	0	0	0	0	3	0	0	0	0	0	1	0	1.608	59	22.8181	0	1020	1020
1	19.4716	0	5	4	8	9	7	1	7	2	6	3	7	4	3	3	9	0	0	3	3	0	0	0	0	0	0	0	0	0	0	0	0	0	0	3	0	0	0	0	0	0	0	1.477	55.5	25.4409
1	22.3874	0	6	5	8	6	7	1	9	2	7	8	3	4	6	8	9	0	0	3	3	0	0	0	0	0	0	0	0	3	0	0	0	3	0	3	3	0	0	0	0	3	0	1.63	42.4	15.9584	0	1380	1380
1	20.1205	0	3	3	9	8	5	2	6	1	4	8	3	3	3	2	1	3	0	0	2	3	3	0	1	0	0	0	0	0	0	0	0	3	0	0	0	0	0	3	0	0	0	1.64	53.7	19.9658	270	1260	1530
1	23.0062	0	6	5	1	8	9	2	7	1	5	1	5	4	5	5	1	0	0	0	0	0	0	0	0	0	0	0	3	0	0	0	0	1	0	0	0	3	1	0	2	3	0	1.571	68.8	27.8764	30	3320	3350
1	21.3279	0	6	4	9	8	4	1	5	1	2	8	2	2	3	1	1	3	0	0	0	0	0	0	0	0	0	2	3	3	0	0	0	0	0	0	3	0	1	0	0	0	0	1.403	49.6	25.198	0	1330	1330
1	22.026	0	9	4	9	8	5	6	1	9	7	8	5	4	3	3	1	3	1	0	2	3	0	3	0	0	0	0	0	0	0	3	0	0	0	1	0	0	3	3	0	0	0	1.593	73.7	29.0426	0	970	970
1	21.0568	0	4	3	8	4	5	1	9	3	7	8	6	4	3	3	1	0	0	1	0	0	0	0	0	0	0	0	0	0	0	0	0	0	3	0	1	0	0	0	0	0	0	1.556	80.3	33.1662
1	21.7467	0	8	4	9	8	3	7	5	2	1	8	5	3	4	2	1	0	0	0	0	0	0	0	0	0	0	0	0	0	0	0	0	0	0	0	0	0	0	0	0	3	0	1.403	68.8	34.9521	600	900	1500
1	19.6824	0	7	4	8	3	5	1	8	1	2	9	4	4	4	4	1	2	1	0	1	2	3	0	2	0	2	0	3	0	0	0	0	0	0	3	2	0	0	0	2	0	0	1.552	61	25.3248	15	2880	2895
1	22.1547	0	4	5	1	8	8	1	9	1	6	1	4	5	5	5	9	0	0	0	0	0	0	0	0	0	0	0	0	0	0	0	0	0	2	0	0	0	0	0	0	3	0	1.637	61.6	22.9871	0	3210	3210
1	21.629	0	6	3	1	8	9	2	7	1	4	1	3	3	3	3	1	0	2	0	0	0	1	3	0	0	0	0	1	2	2	0	2	0	0	3	0	0	0	0	0	0	0	1.598	61	23.8878	1260	715	1975
1	21.0595	0	5	5	1	6	5	1	5	9	5	9	5	5	4	4	1	3	0	0	1	0	0	0	0	0	0	0	3	0	0	0	0	1	3	2	0	3	0	0	0	3	0	1.654	72.2	26.3916	0	1710	1710
1	22.4531	0	6	4	8	9	4	1	5	2	4	9	5	3	2	2	1	0	2	0	0	0	3	2	0	0	0	0	0	0	0	0	0	0	0	0	0	0	0	1	2	0	0	1.599	73.5	28.7469
1	21.1554	0	6	4	1	9	3	6	4	1	8	1	6	4	4	4	1	0	3	1	2	2	3	0	0	2	0	0	3	2	0	0	0	2	0	0	2	3	0	0	0	2	0	1.72	100.6	34.0049
1	20.9966	0	7	3	1	9	4	5	6	1	3	9	2	3	3	2	1	2	0	0	0	0	0	3	1	0	0	2	3	2	0	0	2	0	0	0	0	0	0	3	1	0	1	1.682	59.9	21.1726
1	20.2984	0	2	3	9	4	3	5	9	1	3	7	2	3	3	3	9	3	0	0	0	0	2	0	0	0	0	0	0	0	0	0	0	0	0	3	0	0	0	0	0	0	0	1.674	64	22.8386
1	22.6886	0	5	4	1	8	5	2	9	1	7	6	5	4	5	5	1	2	3	0	3	0	3	0	0	0	0	0	2	0	0	0	0	0	0	3	0	0	3	0	0	0	0	1.582	67.4	26.9307	0	1320	1320
1	22.4997	0	5	4	1	9	5	8	7	2	3	7	4	4	4	2	1	3	0	0	0	0	0	0	0	0	0	0	0	0	3	0	0	0	3	3	0	0	0	0	0	0	0	1.484	60.9	27.6535	450	1385	1835
1	22.7515	0	4	5	1	9	6	4	8	1	4	5	6	4	4	4	9	0	0	0	0	0	1	0	0	0	0	0	0	0	0	0	0	0	0	0	0	0	0	0	0	0	0	1.663	80.3	29.0356	1050	390	1440
1	21.3634	0	3	6	8	9	1	9	1	7	6	8	5	4	4	4	1	0	0	1	0	0	0	0	2	0	0	0	0	3	0	2	1	0	0	3	1	0	0	0	0	3	0	1.66	59	21.4109
1	21.5332		6	3	8	1	8	1	9	1	3	8	3	3	3	3	1	3	0	0	0	0	0	0	0	0	0	0	0	0	0	0	0	0	0	0	0	0	0	0	0	0	0	1.613	51.4	19.7558	0	0	0
1	21.8289	0	4	3	8	1	5	2	9	1	3	9	4	4	3	3	1	3	0	0	0	0	3	0	3	0	0	3	3	0	0	0	3	3	0	3	0	0	0	3	0	0	0	1.58	63.8	25.5568
1	20.9363		5	4	8	8	3	1	8	1	3	9	5	4	4	4	1	3	0	0	0	0	3	0	0	0	0	0	0	0	0	0	0	0	0	3	0	0	0	0	0	3	0	1.667	77.2	27.7809	90	1650	1740
1	20.8898	0	11	3	8	1	4	2	9	1	5	2	4	3	3	3	1	3	0	2	0	0	1	0	0	0	0	0	1	0	0	0	0	0	0	2	0	0	0	2	1	0	0	1.647	68.2	25.1418	90	640	730
1	19.1923	0	6	4	4	8	3	1	4	1	4	8	6	3	3	3	1	3	0	0	0	0	0	0	3	0	0	0	0	0	1	0	0	0	0	0	0	0	0	0	0	0	0	1.605	77.5	30.0851	960	1005	1965
1	19.5099	0	7	2	9	8	7	1	9	1	3	9	1	3	4	4	1	0	0	0	0	0	3	0	0	0	0	0	0	0	0	0	0	0	0	0	1	0	0	0	0	0	0	1.658	48.8	17.7521
1	21.232	0	4	3	8	9	6	1	8	2	3	9	4	3	1	1	1	3	0	0	0	0	0	0	0	0	0	0	3	3	0	0	3	0	0	0	3	0	3	0	3	0	0	1.609	71.3	27.5409	240	1835	2075
1	21.0678	0	8	3	9	8	7	1	9	1	3	8	6	3	4	3	1	3	0	1	0	0	3	3	0	0	0	1	3	0	0	0	0	0	0	3	0	0	0	0	0	3	0	1.595	72.7	28.5768	30	300	330
1	22.3107	0	7	4	1	8	5	9	7	2	3	8	3	4	4	4	1	3	0	0	0	0	3	1	3	0	0	0	3	0	0	0	0	0	3	3	0	0	0	0	0	3	0	1.662	68.2	24.6901
1	22.7379	0	7	4	9	8	5	9	7	1	4	1	3	3	3	3	1	3	3	0	1	0	3	0	3	0	0	0	3	0	0	3	3	3	0	0	0	0	3	0	0	3	0	1.595	51.6	20.2828	0	690	690
1	22.9131	0	7	4	1	9	7	3	8	1	9	2	4	4	4	4	9	0	0	3	2	0	3	1	0	0	0	0	0	0	3	2	0	0	0	2	3	3	0	1	0	2	0	1.58	49.4	19.7885
1	21.1444	0	1	5	8	9	2	7	5	1	4	9	4	2	5	3	1	3	0	0	0	0	3	0	0	0	0	0	3	0	0	0	3	0	0	3	0	0	0	0	0	3	0	1.57	57.7	23.4087	0	1370	1370
1	21.807	0	4	2	5	8	4	2	6	1	4	1	3	2	4	3	1	3	0	0	1	0	0	0	0	0	0	0	0	0	0	0	0	0	0	3	0	0	0	0	0	3	0	1.717	62.8	21.3019	90	30	120
1	22.9459	0	9	4	1	9	3	9	8	7	1	2	5	4	3	4	1	0	2	3	0	0	3	1	0	0	0	0	0	3	0	3	0	0	0	3	0	0	0	0	0	0	0	1.753	67.8	22.0631	540	2180	2720
1	22.4559	0	4	5	3	6	4	1	9	1	7	8	4	3	6	4	9	3	0	0	0	0	0	0	0	0	0	0	0	0	0	0	0	0	0	0	0	0	0	0	0	1	0	1.597	59.7	23.408	30	15	45
1	22.3025	0	10	4	8	9	3	1	9	2	4	9	4	3	3	2	1	0	1	2	0	0	1	0	0	0	0	2	3	3	3	1	0	0	3	0	0	0	0	0	3	0	0	1.572	67.8	27.4362	120	30	150
1	21.3826	0	4	5	1	9	7	1	3	8	3	9	3	4	5	3	9	2	0	0	0	0	0	0	0	0	0	0	2	0	0	0	0	0	0	0	0	0	0	1	0	0	0	1.674	65.9	23.5166	240	1585	1825
1	20.9938	0	9	5	3	8	4	7	3	1	6	5	4	1	7	3	1	3	0	0	0	0	0	0	3	0	0	0	0	0	0	0	0	0	0	0	0	0	0	0	0	0	0	1.59	85	33.6221	280	0	280
1	19.5099	0	6	3	1	8	5	1	5	1	8	1	3	3	3	3	1	3	0	1	1	1	0	0	0	0	0	0	0	3	0	0	0	0	0	0	3	0	0	0	0	0	0	1.589	44.4	17.5847	0	2160	2160
1	21.5962	0	6															0	0	0	0	0	0	0	0	0	0	0	0	0	0	0	0	0	0	0	0	0	0	0	0	0	0	1.723	78.3	26.3749	0	1750	1750
1	22.8282	0	5	4	9	8	4	1	8	1	4	8	4	4	4	4	1	0	1	3	0	0	3	0	0	0	0	0	3	0	0	0	0	0	3	3	0	0	0	0	0	0	0	1.694	63.3	22.0585	0	2600	2600
1	21.2758	0	9	4	1	8	6	2	9	1	7	1	4	4	5	2	9	2	3	0	1	0	0	0	0	0	0	0	0	0	0	0	0	0	0	0	0	0	0	0	0	3	0	1.549	51.7	21.547	0	600	600
1	23.2553	0	5	6	1	2	9	4	7	1	5	2	4	4	1	9	9	0	0	0	3	0	0	0	0	0	0	3	0	0	0	0	0	0	0	0	0	0	0	0	0	0	0	1.67	55.6	19.9362	0	0	0
1	20.6516	0	5	5	1	8	6	1	9	1	4	9	3	4	4	4	1	0	0	0	0	0	3	2	0	0	0	0	0	0	1	0	0	0	0	0	0	0	0	0	0	3	0	1.666	51.3	18.4828	30	940	970
1	21.2402	0	6	5	8	1	4	1	3	2	3	2	2	3	4	2	1	0	0	0	0	0	3	3	0	0	0	0	3	0	0	0	0	0	3	0	3	3	3	0	0	0	0	1.662	55.6	20.1286	0	120	120
1	21.5989	0	5	8	1	3	2	8	5	9	7	1	4	4	5	2	1	0	3	0	3	0	0	3	0	0	3	2	1	3	0	3	3	0	3	0	3	3	0	2	1	3	0	1.406	61.8	31.2621
1	22.8994	0	3	3	4	8	5	7	9	1	9	1	1	3	3	3	9	0	0	0	0	0	0	0	0	0	0	0	0	0	0	0	0	0	0	0	0	0	0	0	0	0	0	1.561	46.2	18.9599	160	1680	1840
1	20.0274	0	7	4	9	9	5	1	1	9	3	9	4	3	3	2	1	3	0	0	0	0	3	3	0	0	0	0	3	0	0	0	0	3	3	3	0	0	0	0	0	0	0	1.634	61.8	23.1464	0	640	640
1	22.319	0	5	1	9	8	5	9	7	3	4	9	3	1	3	3	1	1	1	0	1	0	0	1	1	1	1	0	0	1	0	1	0	0	0	0	2	2	2	0	0	0	0	1.633	72.4	27.1498	0	1195	1195
1	20.9227	0	4	4	1	8	5	9	2	1	3	8	5	3	3	3	1	0	0	0	0	0	3	0	0	0	0	0	0	0	1	0	0	0	3	3	0	0	0	0	0	0	0	1.571	67.5	27.3496	0	1855	1855
1	21.5168	0	5	4	1	9	8	2	7	1	3	1	3	3	4	1	1	3	2	0	0	0	0	0	0	0	0	0	0	0	0	0	0	0	0	0	0	0	0	0	0	2	0	1.558	46.4	19.1154	980	1305	2285
1	22.3299	0	7	5	9	8	3	6	3	8	4	1	5	5	4	6	9	1	0	1	0	0	1	0	1	0	0	0	1	0	0	1	0	0	0	0	0	0	0	0	0	0	0	1.642	69.9	25.9257	1080	900	1980
1	20.1862	0	6	4	8	9	8	1	7	1	3	8	4	5	5	5	9	0	0	0	0	0	0	0	0	0	0	1	2	0	0	0	0	0	0	3	0	0	0	0	0	3	0	1.595	57.9	22.7592	50	130	180
1	21.3854	0	4	5	8	9	7	6	4	1	3	2	2	4	2	2	1	3	3	3	3	0	3	0	0	0	0	0	0	3	0	3	3	0	0	3	0	0	0	0	0	0	0	1.66	61.7	22.3908
1	22.5435	0	5	3	8	3	7	5	9	2	4	8	4	3	3	3	1	3	0	0	0	0	0	0	0	0	1	0	0	0	3	0	0	0	0	0	0	0	0	0	0	0	0	1.623	75.6	28.7002	420	300	720
1	21.5222	0	3	5	1	8	8	1	3	1	6	8	5	5	6	4	1	0	0	0	0	0	1	0	1	0	0	0	0	0	0	0	3	0	0	0	0	0	0	0	0	0	0	1.591	65.4	25.8367	180	570	750
1	20.627	0	3	2	8	6	3	7	9	1	4	5	3	1	4	5	1	0	0	3	0	0	0	0	3	0	0	3	3	0	0	0	0	3	3	3	0	0	0	0	0	3	0	1.573	53.1	21.4604
1	23.0965	0	5	5	9	9	6	8	9	1	4	9	2	2	2	8	1	3	0	0	0	0	3	2	0	0	0	0	0	3	0	0	0	0	0	3	0	2	0	0	1	2	0	1.631	50	18.7959	120	1200	1320
1	21.2923	0	8	3	4	9	6	3	1	8	2	9	8	8	3	3	1	1	3	2	0	0	0	0	0	0	0	0	0	0	0	0	0	0	0	3	0	0	0	0	0	0	0	1.596	62.9	24.6936	600	360	960
1	21.5305	0	7	4	8	9	6	1	8	1	4	8	3	4	4	4	1	3	0	0	0	0	0	1	0	0	0	0	0	3	0	0	3	0	3	3	0	0	3	0	3	0	0	1.616	50.1	19.1847	0	591	591
1	21.7604	0	10	4	8	8	6	1	8	1	5	1	4	4	4	4	1	3	0	0	0	0	3	0	0	0	0	0	3	0	0	0	0	0	0	0	0	0	3	0	0	0	0	1.627	56.2	21.2305
1	21.1882	0	5	5	8	9	9	1	8	1	7	2	3	4	6	6	9	1	0	0	0	0	0	0	0	0	0	0	0	0	0	0	0	2	3	3	0	0	0	0	0	0	0	1.752	51.5	16.778	1260	2355	3615
1	19.8275	0	4	4	8	8	3	1	2	1	3	9	5	5	4	4	1	3	0	0	0	0	0	0	0	0	0	0	0	3	0	0	3	0	1	3	0	0	0	0	0	0	0	1.584			135	735	870
1	22.412		5	2	9	8	3	9	1	1	2	9	2	2	2	2	1	3	0	0	0	0	3	0	0	0	0	0	3	3	0	0	0	0	3	3	0	0	3	3	0	0	0	1.6	54.3	21.2109	120	1320	1440
1	19.3101	0	3	4	8	9	5	6	7	1	5	1	4	5	6	4	1	3	0	0	0	0	3	0	0	0	0	0	0	0	0	0	0	0	0	3	0	0	0	0	0	0	0	1.585	54.3	21.6143	0	2040	2040
1	19.7426	0	3	4	8	6	1	9	8	1	8	1	4	4	4	4	9	0	1	3	2	0	1	0	0	0	0	0	1	0	1	0	0	1	0	1	0	1	0	0	0	1	0	1.611	57.5	22.1553	120	3000	3120
1	21.5387	0	9	5	7	8	3	2	1	1	9	7	5	5	4	6	9	3	0	0	0	0	0	0	0	0	0	0	0	0	0	0	0	0	0	3	0	0	0	0	0	0	0	1.634	63.1	23.6333	0	0	0
1	23.0363	0	5	2	8	9	4	7	5	1	2	8	3	2	9	5	1	3	0	0	0	0	3	0	0	0	0	0	0	0	0	0	0	0	0	0	0	0	0	0	0	2	0	1.622	53.1	20.1833	120	1770	1890
1	22.7187	0	9	4	9	1	4	3	5	8	5	9	4	4	3	5	9	3	0	2	0	0	3	3	0	0	1	0	0	0	0	0	3	0	0	1	0	0	0	0	0	3	0	1.614	68.9	26.4492	0	1380	1380
1	22.4805	0	6	4	9	8	5	8	8	1	5	8	4	4	4	4	1	0	0	0	0	0	0	0	0	0	0	0	0	0	0	0	0	0	0	0	0	0	0	0	0	0	0	1.521	56.8	24.5522	140	1770	1910
1	21.6454		5	3	8	1	8	1	2	8	4	8	4	3	3	8	1	3	0	0	0	0	3	0	0	0	0	0	0	0	0	0	0	0	0	3	0	3	0	0	0	0	0	1.565	48.5	19.8022	1260	380	1640
1	22.7296	0	10	2	9	1	4	3	6	1	2	8	2	4	4	4	9	3	2	0	0	3	3	0	2	0	0	0	0	0	0	0	0	0	3	0	0	0	0	0	0	0	0	1.607	51.1	19.7874	0	1820	1820
1	22.5927	0	8	3	9	8	4	7	5	1	6	2	4	3	3	3	9	3	3	0	0	0	0	0	0	0	0	0	0	0	0	0	0	0	0	3	0	0	0	0	0	0	0	1.538	68.3	28.8741	0	1560	1560
1	19.896		4	5	1	7	9	2	9	1	2	8	5	4	5	5	9	0	0	0	0	0	3	2	0	0	0	1	0	0	0	0	0	0	0	3	0	1	0	0	0	0	0	1.632	62.5	23.466	1680	480	2160
1	19.5729	0	6	3	8	9	1	8	9	1	3	9	4	3	3	3	1	3	0	0	0	0	0	0	0	0	0	3	0	0	3	0	0	0	0	0	0	0	0	0	0	0	0	1.633	65.6	24.5998	0	2120	2120
1	16.5339	0	7	2	9	8	3	1	6	1	2	9	3	2	2	2	1	3	0	0	0	0	3	0	0	0	0	1	0	0	0	0	0	0	0	3	0	1	0	0	0	3	0	1.651	57.8	21.2048	210	3420	3630
1	22.2177	0	6	4	9	8	7	1	6	1	4	8	4	4	5	1	1	3	0	1	0	0	3	0	0	0	0	2	0	0	0	0	2	0	0	0	0	0	0	0	0	3	0	1.549	72.6	30.2576	240	1320	1560
1	19.258	0	5	2	9	8	3	1	7	1	4	3	3	4	4	3	1	3	2	0	0	0	2	0	0	0	0	3	0	3	3	0	0	0	2	0	0	0	1	3	0	0	2	1.62	55.6	21.1858
1	22.3929	0	6	4	9	1	8	2	6	1	4	1	6	4	4	4	1	2	0	0	0	0	0	0	0	0	1	0	0	0	1	0	0	0	0	0	0	0	0	0	0	0	0	1.47	63	29.1545	0	1950	1950
1	22.7132	0	7	2	8	8	4	1	6	1	2	8	3	2	2	1	1	3	0	1	0	0	0	0	0	0	0	3	2	0	0	0	0	0	3	0	0	0	0	0	0	0	0	1.512	59.6	26.0701	0	2610	2610
1	22.4613	0	7	2	8	9	1	3	2	4	5	7	2	3	4	4	1	3	3	3	3	3	3	0	0	0	0	0	3	3	0	3	3	0	0	3	0	0	3	0	0	0	0	1.653	57.2	20.9339	0	900	900
1	20.9637	0	5	1	2	9	5	8	6	3	5	7	4	4	4	4	1	3	0	3	0	3	2	0	0	0	0	0	3	0	0	2	0	0	0	3	0	0	0	1	0	3	0	1.643	75.9	28.1168
1	19.5154	0	7	4	8	2	4	1	3	8	4	1	4	4	6	6	1	2	0	0	2	3	3	0	1	0	0	0	3	0	0	3	2	0	2	0	3	0	0	3	2	0	3	1.667	67.4	24.2543	0	2190	2190
1	21.1964	0	6	7	1	9	6	4	5	3	7	4	7	7	8	7	9	0	0	0	0	0	3	0	0	0	0	0	0	0	0	0	0	0	0	0	0	0	0	0	0	0	0	1.648	63.4	23.344	0	2880	2880
1	19.833	0	6	4	9	8	6	3	7	1	2	4	3	4	7	5	1	3	3	1	0	0	0	0	0	0	0	0	0	3	0	0	0	0	0	0	2	0	3	0	0	3	0	1.67	62.7	22.482
1	23.1732	0	6	1	9	8	4	7	1	8	2	9	4	2	2	3	1	0	2	0	0	3	3	1	0	0	0	0	2	1	1	3	3	0	0	3	0	3	1	2	3	3	0	1.647	76.5	28.2016	450	3870	4320
1	22.2368	0	5	3	1	2	9	4	5	6	8	7	3	6	6	6	9	0	0	0	0	1	0	0	0	0	0	3	0	0	2	0	0	0	2	0	0	0	0	0	0	2	0	1.766	55.2	17.6994	0	3180	3180
1	22.6995	0	5	2	8	9	4	1	8	1	3	9	3	3	3	3	1	3	2	0	0	0	2	2	0	0	1	0	0	0	0	0	0	0	2	0	0	0	0	0	0	0	0	1.636	66.2	24.7338	0	3170	3170
1	22.5599	0	6	7	1	8	4	7	5	2	3	7	1	4	6	5	1	0	0	0	3	1	0	0	0	0	0	0	1	0	0	1	3	0	3	3	0	0	0	0	0	0	0	1.575	52.7	21.2446	840	40	880
1	19.4333	0	8	4	8	1	7	2	6	1	3	8	3	3	3	2	1	3	0	0	1	0	3	0	0	0	0	0	0	0	0	0	0	0	0	0	0	0	0	0	0	0	0	1.538	58.1	24.562	1680	585	2265
1	21.2539	0	3	5	1	8	3	2	8	1	7	1	3	5	5	5	1	0	0	3	0	3	1	0	0	0	0	0	2	0	0	3	0	0	0	0	0	0	0	0	0	0	0	1.58	45.8	18.3464	15	525	540
1	22.9459	0	6	5	4	9	4	8	7	1	8	1	7	5	4	3	1	1	0	0	0	0	0	0	0	0	0	0	0	0	3	0	0	0	0	0	0	0	3	0	0	0	0	1.52	76	32.8947	1260	70	1330
1	22.4038	0	10	4	8	9	4	1	2	9	7	8	4	4	4	3	1	0	1	0	0	0	0	0	0	0	0	3	3	0	3	3	0	3	0	3	0	0	3	3	0	0	0	1.576	64	25.7672	105	930	1035
1	21.5359		5	5	8	9	1	3	4	6	2	7	5	4	6	7	1	3	0	0	0	0	0	3	3	0	0	3	0	1	1	0	0	0	0	0	0	3	0	0	0	0	0	1.521	54.4	23.5148
1	21.3689	0	5	1	9	9	1	9	4	1	1	9	1	1	1	1	1	3	0	0	0	0	2	0	0	0	0	0	0	2	0	0	0	0	0	0	0	0	0	1	0	1	0	1.654	46.8	17.107	20	1420	1440
1	21.0924	0	8	2	9	8	4	7	3	1	1	4	3	1	2	1	1	3	0	1	0	1	2	0	0	0	0	0	0	0	0	3	0	0	0	3	0	0	0	0	0	0	0	1.677	67.4	23.9659	1260	450	1710
1	22.2916	0	3	3	9	8	6	1	7	2	4	8	2	4	3	1	1	3	1	0	0	0	0	0	0	0	0	0	0	0	0	0	0	0	0	2	0	0	0	0	0	0	0	1.637	70.9	26.4575	1260	90	1350
1	20.9144	0	5	4	8	1	5	7	4	1	9	2	4	4	5	4	1	0	0	0	1	1	3	3	0	0	0	0	0	3	0	0	3	0	3	0	0	1	0	3	0	3	0	1.621	67.1	25.5362	840	3900	4740
1	22.8556	0	5	3	3	6	9	1	3	1	3	2	4	4	4	5	1	1	0	0	2	0	1	0	0	0	0	0	0	0	3	0	0	0	0	0	0	0	0	0	0	0	0	1.608	71.6	27.6911	4500	160	4660
1	21.0349	0	5	3	8	6	2	1	3	9	1	8	3	2	2	2	1	0	0	0	0	0	3	0	0	0	0	0	0	0	0	0	0	0	0	3	0	0	3	0	0	0	0	1.596	59.4	23.3196	0	3220	3220
1	22.3354	0	3	3	1	9	6	8	9	1	2	4	4	3	5	4	1	1	0	0	0	0	0	0	0	0	0	0	0	0	0	0	0	0	0	0	0	0	0	0	0	0	0	1.663	59.4	21.4784	1680	120	1800
1	19.8138	0	5	4	8	9	1	2	5	7	3	8	4	2	2	2	1	0	0	0	0	3	0	0	0	0	0	0	3	0	2	0	0	0	0	3	0	3	0	0	0	3	0	1.543	68.8	28.8973	2940	90	3030
1	22.8282	0	3	4	1	8	5	2	9	1	3	5	4	3	5	4	1	3	0	1	0	0	0	0	0	0	0	0	0	0	0	0	0	0	0	0	0	0	0	0	0	0	0	1.617	67.1	25.6627	840	420	1260
1	21.0021	0	4	5	3	7	8	1	2	6	9	4	2	3	4	2	9	3	0	0	0	0	0	0	0	0	0	0	0	0	0	0	0	0	0	0	0	0	0	0	0	0	0	1.549	45.1	18.7964	0	0	0
1	20.8268	0	5	4	7	8	2	8	9	1	5	6	2	9	7	4	1	2	0	0	0	2	3	1	0	0	0	0	0	0	0	0	0	0	0	0	0	0	0	0	0	0	0	1.615	49.2	18.8634	165	720	885
1	22.9952	0	4	5	1	8	7	2	8	1	6	1	4	5	6	4	9	0	0	0	0	0	3	2	0	0	0	0	3	1	0	0	0	1	3	3	0	0	1	0	0	2	0	1.593	56.1	22.1071	0	2730	2730
1	21.0349	0	5	5	8	9	3	2	5	9	4	9	7	6	6	6	9	0	0	0	0	0	0	0	2	0	0	0	0	0	0	0	0	0	0	3	0	0	0	0	0	0	0	1.526	75.5	32.4219	30	0	30
1	22.6201	0	6	3	9	6	2	1	2	1	3	2	6	2	2	2	1	3	3	0	1	3	3	3	1	0	3	0	3	1	3	0	3	0	0	3	0	3	0	0	0	3	0	1.623	92.7	35.1919
1	22.5051	0	6	3	9	1	4	2	7	2	7	1	4	4	5	4	9	0	0	0	0	0	3	0	0	0	0	0	0	0	0	0	1	0	0	3	0	0	0	0	0	0	0	1.63	61.7	23.2226	45	1680	1725
1	21.7385	0	2	4	9	9	7	1	5	1	9	1	2	2	2	2	1	0	0	3	3	0	3	0	0	0	0	0	0	3	0	0	0	0	0	3	3	0	1	0	3	0	0	1.405	50.5	25.5822	0	290	290
1	23.0582	0	5	5	1	2	8	3	7	1	4	9	5	5	5	5	9	0	0	3	0	3	0	0	0	0	0	0	0	0	0	0	0	0	0	3	0	0	0	0	0	0	0	1.788	98	30.6543	1200	15	1215
1	21.2375	0	5	3	8	1	7	4	9	1	3	8	2	3	3	3	1	3	0	0	0	0	3	0	0	0	0	0	0	0	3	0	0	0	0	3	0	0	0	0	0	0	0	1.62	52.2	19.8903	960	1880	2840
1	21.5825	0	5	2	8	8	5	1	7	1	6	8	6	3	8	4	1	0	0	1	3	0	3	3	0	0	0	0	0	0	3	0	0	0	0	0	3	3	0	0	0	3	0	1.544	90.5	37.9624	1290	345	1635
1	22.8528	0	4	4	9	1	5	2	5	1	6	1	4	5	5	5	9	3	0	0	0	3	3	0	0	0	0	0	3	1	0	3	0	1	3	3	3	1	1	0	3	0	0	1.586	56.9	22.6207	180	1740	1920
1	19.9644	0	5	6	8	1	5	1	3	1	5	8	3	5	4	5	9	0	0	0	0	0	0	0	1	0	0	0	0	0	0	0	0	0	0	0	0	0	0	0	0	0	0	1.642	73.9	27.4093	0	2170	2170
1	21.0951	0	4	2	9	8	8	1	8	1	1	8	8	2	2	2	1	3	0	1	0	0	0	0	0	0	3	0	0	0	2	0	0	0	0	0	0	0	3	0	0	0	0	1.636	138.2	51.6347	900	105	1005
1	22.935	0	5	5	9	8	3	1	4	2	4	1	6	4	3	3	1	1	0	0	0	0	0	0	0	0	0	0	1	0	0	0	0	0	1	0	0	0	0	0	0	3	0	1.656	86.8	31.6518	20	3580	3600
1	22.2943	0	5	5	8	9	4	6	1	7	3	1	5	5	3	4	1	3	0	3	2	1	0	3	3	1	0	0	0	3	1	0	3	2	3	0	0	0	2	2	3	0	2	1.619	89	33.9544	240	2280	2520
1	22.5106	0	5	8	2	5	9	1	7	3	9	1	7	8	9	7	9	0	0	0	0	0	0	0	0	0	0	0	0	3	0	0	0	0	3	0	0	0	0	0	0	2	0	1.618	57.3	21.8876	2520	1725	4245
1	19.7262	0	4	4	6	1	9	7	5	1	6	2	4	3	6	9	1	3	2	2	0	0	0	0	0	0	0	0	0	0	3	0	0	3	2	0	0	3	2	0	0	3	0	1.61	48.1	18.5564	120	420	540
1	22.4011	0	4	4	9	1	3	5	7	2	8	1	4	2	5	3	1	0	1	0	0	3	3	0	3	0	0	0	0	0	0	0	0	0	0	0	0	3	3	0	0	0	0	1.596	62.5	24.5366	1260	20	1280
1	21.3717	0	6	4	9	8	3	1	9	1	3	1	4	4	4	4	1	0	0	0	0	0	0	0	0	0	0	0	0	0	0	0	0	0	0	0	0	0	0	0	0	0	0	1.627	57.5	21.7216	0	2520	2520
1	21.5031	0	5	3	8	9	3	1	3	1	3	2	3	3	3	3	1	3	0	0	0	0	0	0	0	0	0	0	0	0	0	0	1	0	0	0	3	0	0	0	0	0	0	1.637	62.8	23.4349	840	210	1050
1	22.9213	0	5	3	9	9	3	1	8	1	4	1	5	3	3	3	1	3	0	0	0	0	0	0	0	0	0	0	0	0	0	0	0	0	0	3	0	0	0	0	0	3	0	1.615	76.4	29.292	1260	110	1370
1	21.013	0	5	4	9	8	6	1	5	2	3	8	4	3	3	2	1	3	0	0	0	3	0	3	0	0	0	0	0	0	0	0	3	0	3	3	0	3	0	0	0	0	0	1.618	70.9	27.0825	1680	230	1910
1	22.319	0	4	3	9	1	8	4	9	1	3	1	3	3	3	3	9	3	0	1	0	0	0	0	0	0	0	0	0	0	0	3	0	0	0	0	0	0	0	0	0	0	0	1.607	56.2	21.7623	1500	280	1780
1	22.7159	0	6	3	9	5	3	9	3	9	3	9	3	3	3	9	1	0	3	0	0	0	3	0	0	0	0	0	0	0	0	0	0	0	0	3	0	0	0	0	0	0	0	1.571	54	21.8797	0	1260	1260
1	21.1663	0	5	6	1	8	8	9	8	1	3	1	6	5	6	6	1	0	0	0	0	0	0	0	0	0	0	0	3	0	0	0	0	0	0	3	0	0	0	0	0	0	0	1.497	52.3	23.3377	540	620	1160
1	19.6413	0	9	4	9	5	6	8	4	1	4	8	7	4	4	4	1	3	0	2	2	0	0	0	0	0	0	3	3	0	3	0	0	0	0	1	0	0	0	3	0	0	0	1.586	91.2	36.2567	0	3165	3165
1	22.757	0	9	2	9	1	6	9	3	5	7	4	2	1	8	4	1	2	3	0	0	0	0	3	0	0	0	0	0	0	0	0	0	0	0	0	0	0	0	0	0	0	0	1.616	51.2	19.6059	0	1170	1170
1	21.3142	0	5	3	8	9	2	1	4	1	3	1	3	2	2	2	1	0	2	0	2	0	0	0	0	0	0	0	0	0	2	2	0	3	3	3	0	0	0	0	0	3	0	1.612	72.1	27.7463	1080	1890	2970
1	22.0616	0	5	5	8	9	1	7	5	2	4	1	5	4	4	4	1	0	0	0	0	3	3	0	0	0	0	0	3	0	0	3	0	1	3	3	0	3	0	0	0	0	0	1.514	72.5	31.6291	900	225	1125
1	21.9986	0	8	4	8	1	6	3	9	2	5	1	5	4	6	3	1	2	0	3	0	1	3	0	0	0	0	0	1	0	0	1	0	0	0	0	0	0	2	0	0	0	0	1.631	73	27.4419	0	2940	2940
1	20.6571	0	5	3	9	8	8	1	9	1	3	2	3	4	5	4	1	3	0	0	1	0	3	0	0	0	0	0	2	0	0	0	0	0	0	0	0	0	0	0	0	0	0	1.649	55.3	20.3369	45	385	430
1	19.729	0	4	3	9	8	5	1	9	1	3	9	3	3	3	3	1	3	0	0	0	0	2	0	0	0	0	2	0	0	0	3	2	0	0	3	0	0	0	0	0	3	0	1.674	50.2	17.914
1	21.1828	0	5	8	1	9	6	5	8	2	4	3	6	6	6	6	1	0	0	0	0	0	3	0	0	0	0	0	0	0	3	0	1	0	0	0	0	0	0	0	1	0	0	1.601	67.4	26.2952	900	2190	3090
1	19.6112	0	4	5	9	4	6	1	8	1	7	3	4	6	6	6	9	0	3	3	3	0	0	0	0	0	0	3	0	3	0	0	0	0	0	3	0	0	0	0	0	3	0	1.55	45	18.7305	2940	280	3220
1	20.4298	0	6	4	9	1	7	1	9	1	4	1	4	4	4	4	1	0	3	0	0	3	3	0	0	0	0	0	0	0	0	0	0	0	3	0	0	0	0	0	0	0	0	1.606	63.8	24.736	60	1930	1990
1	21.2457	0	7	4	8	8	5	2	8	1	5	8	3	4	4	4	1	3	0	0	0	3	3	0	0	0	0	0	0	3	0	3	0	0	3	3	0	0	0	0	0	0	0	1.632	55	20.6501
1	19.6879	0	7	4	8	9	7	1	8	1	2	9	4	3	3	3	1	3	0	0	0	3	3	0	0	0	0	0	3	0	0	3	0	0	0	3	0	0	0	3	3	0	0	1.475	66.1	30.3821	0	1090	1090
1	20.9199	0	5	2	9	8	7	1	2	1	3	9	7	3	3	3	1	3	0	0	0	0	3	0	0	0	0	0	1	0	0	3	2	0	0	0	0	0	0	0	0	0	0	1.537	72.7	30.7742	180	1130	1310
1	20.3039	0	6	4	8	6	9	1	6	2	7	9	4	3	2	3	1	2	0	0	2	0	1	0	0	0	0	0	1	0	0	0	1	0	2	0	2	0	0	0	0	3	0	1.619	68.2	26.019	0	3248	3248
1	19.4908	0	5	4	8	9	6	9	5	1	7	2	5	4	5	3	9	0	0	0	0	2	0	0	0	0	0	0	0	0	0	0	0	0	2	0	0	0	0	0	2	1	0	1.625	74.8	28.3266
1	19.8768	0	4	4	2	9	8	1	9	2	3	1	5	3	3	3	1	3	0	2	2	0	0	0	0	0	0	3	0	0	0	3	0	0	0	0	0	3	0	0	0	0	0	1.581	65	26.0046	30	60	90
1	19.8932	0	5	9	1	7	6	1	8	1	5	2	5	6	6	6	9	1	0	0	0	1	2	0	2	0	0	0	0	0	0	0	0	0	2	0	0	0	0	0	0	3	0	1.623	67.9	25.777	30	3000	3030
1	22.7296	0	2	8	1	9	5	8	6	7	4	3	6	6	6	6	9	0	0	3	0	0	0	0	0	0	0	0	0	0	0	1	0	0	0	0	0	0	0	0	3	0	0	1.593	68.5	26.9935	480	1755	2235
1	22.5654	0	7	4	5	9	3	8	5	1	2	6	2	2	2	2	1	3	3	0	0	0	0	0	3	0	0	0	0	3	0	3	3	0	3	3	0	3	0	0	0	1	0	1.623	51.9	19.7029	0	1560	1560
1	21.6044	0	4	3	9	9	4	1	8	1	3	9	5	3	4	6	1	0	0	0	0	3	3	0	0	0	0	0	3	0	0	0	0	0	0	3	3	0	0	0	0	0	0	1.64	62.8	23.3492	360	1800	2160
1	20.9227	0	5	5	8	1	3	1	4	1	5	8	3	4	4	4	1	0	0	3	1	3	3	0	3	0	3	1	3	3	2	2	0	0	3	3	0	0	0	0	0	0	0	1.673	55	19.6504	360	480	840
1	22.8282	0	5	4	9	9	4	3	9	6	4	1	4	4	5	4	1	0	3	0	0	3	3	3	0	0	0	0	0	0	0	2	0	0	0	3	0	0	1	0	0	0	0	1.613	60.7	23.3303	0	1890	1890
1	20.1615	0	3	3	8	2	1	6	8	1	5	9	4	3	3	5	9	0	0	3	0	3	3	0	0	0	2	3	0	0	3	0	0	0	3	0	0	0	0	0	0	0	0
1	22.3436	0	5	5	1	9	4	1	5	1	5	1	3	5	5	5	9	0	0	3	0	0	0	0	0	0	0	0	0	1	0	0	0	0	0	0	0	0	0	0	0	0	0	1.722	64.5	21.7517
1	20.6461	0	3	5	1	6	8	2	9	1	7	2	6	8	8	8	1	3	0	0	0	0	0	0	0	0	0	0	0	0	0	0	0	0	0	3	0	0	0	0	0	0	0	1.612	72.2	27.7848	180	660	840
1	20.3258	0	4	3	8	9	8	1	2	1	3	8	5	3	2	2	1	3	0	0	3	0	0	0	0	0	0	3	3	0	0	0	0	0	0	0	0	0	0	3	0	0	0	1.567	80.2	32.6615	105	385	490
1	20.8268	0	1	4	1	7	6	8	9	2	5	1	3	4	7	4	1	2	2	1	0	0	3	2	3	0	0	0	0	3	0	0	3	0	3	3	0	0	0	0	0	0	0				420	480	900
1	21.0157	0	6	4	1	9	7	1	8	1	4	9	5	3	6	3	1	3	0	0	1	0	3	3	0	0	0	1	0	0	0	0	0	0	0	0	0	0	0	0	0	0	0	1.626	69.3	26.2115	0	600	600
1	21.024	0	6	5	8	1	7	1	9	1	5	1	2	5	4	5	9	0	0	0	0	0	3	3	3	0	0	0	0	3	0	3	3	0	0	3	0	3	3	0	0	0	0	1.616	55.7	21.3291	450	730	1180
1	22.9979	0	5	4	1	9	4	9	8	1	9	1	3	3	3	6	9	2	0	0	0	0	0	0	0	0	0	0	0	3	0	0	0	0	0	2	0	0	0	0	0	0	0	1.617	54.5	20.8438	0	3000	3000
1	23.0034	0	5	4	9	8	3	7	6	1	4	5	4	4	4	4	1	0	0	0	0	0	1	0	0	0	0	0	2	0	0	0	0	0	3	0	0	0	0	0	0	0	0	1.567	72.3	29.4442	900	3435	4335
1	22.2998	0	7	2	9	9	4	1	8	1	3	8	3	2	3	2	1	3	0	3	1	0	0	0	0	0	0	0	0	0	0	0	0	0	0	0	0	0	0	0	2	0	0	1.579	52.8	21.1773	0	3276	3276
1	23.0335	0	5	3	9	7	3	9	3	1	3	1	4	3	3	3	1	1	0	0	0	0	0	0	0	0	0	0	0	0	0	0	0	0	3	2	0	0	0	0	0	0	0	1.649	67.5	24.8235	0	4620	4620
1	19.6988	0	4	1	4	7	3	9	8	6	7	1	3	4	6	5	9	0	0	2	3	0	3	0	0	0	0	0	0	0	0	0	0	0	3	3	0	0	0	0	0	3	0	1.713	63.3	21.5719
1	23.0856	0	4	3	8	7	6	8	2	9	4	9	4	2	3	3	1	3	0	0	0	2	3	0	0	0	0	0	3	0	0	0	3	0	0	3	0	0	0	0	0	0	0	1.747	91.4	29.9475	840	0	840
1	20.2491	0	9	2	8	9	4	1	9	1	2	9	3	2	3	3	1	3	0	0	0	3	0	0	0	0	0	0	0	0	0	0	0	0	3	0	0	0	0	1	0	0	0	1.622	64.5	24.5165	0	1420	1420
1	23.1075	0	6	3	1	8	6	2	9	1	9	1	3	6	5	7	9	0	0	0	3	0	2	0	0	0	0	1	3	0	0	3	0	0	0	3	1	0	0	0	0	0	0	1.582	51.1	20.4178
1	22.9843	0	7	2	8	7	9	1	2	1	4	1	4	2	2	6	1	3	0	0	0	1	0	0	0	0	0	0	3	0	1	0	0	0	0	0	0	0	0	0	0	0	0	1.586	68.6	27.272	2970	1780	4750
1	20.0356	0	8	4	9	1	7	1	8	1	4	8	4	4	5	4	9	0	0	2	0	0	3	0	0	0	0	0	0	0	0	0	0	0	0	0	0	0	0	0	3	3	0	1.649	55.6	20.4472
1	19.8056	0	1	4	8	2	3	8	9	1	7	5	3	4	6	6	9	0	0	0	0	0	0	0	0	0	0	0	0	3	0	0	0	0	0	3	0	0	0	0	0	0	0	1.594	56.5	22.2368
1	23.05	0	5	6	1	8	9	4	3	2	7	8	5	4	4	4	9	0	0	1	2	0	0	0	0	0	0	0	0	0	0	0	1	0	0	2	0	0	0	0	0	3	0	1.651	84.9	31.1468	210	1440	1650
1	23.0828	0	4	3	1	8	9	2	8	1	2	8	5	3	6	5	1	0	0	0	0	0	0	0	0	0	0	0	0	0	0	0	0	0	3	3	0	0	0	0	3	3	0	1.58	50.5	20.2291	720	3180	3900
1	20.6078	0	4	1	9	8	3	7	9	1	3	6	1	2	2	2	1	0	0	0	0	0	1	0	0	0	0	0	0	0	0	1	0	0	0	0	0	0	0	0	0	0	0	1.643	60.3	22.3379
1	22.2012	0	5	4	3	8	9	2	8	1	5	8	4	3	7	1	1	0	0	0	3	0	3	0	0	0	0	0	0	0	1	0	0	0	3	0	0	3	0	0	0	1	0	1.654	67	24.4908
1	21.4538	0	7	3	8	9	7	1	7	1	5	4	4	2	5	2	1	3	0	0	0	0	3	0	0	0	0	0	0	3	0	0	0	0	3	3	0	0	0	0	0	3	0	1.58	48.8	19.5481	0	585	585
1	19.8604	0	6															0	0	0	0	0	0	0	0	0	0	0	0	0	0	0	0	0	0	0	0	0	0	0	0	0	0	1.597	73.5	28.8189
1	19.5099	0	10	2	8	8	1	8	1	8	1	8	3	1	3	3	1	3	0	0	0	2	3	0	0	0	0	0	3	0	0	0	0	3	3	0	0	0	0	0	0	0	0	1.541	56.7	23.8769	0	1785	1785
1	23.2279	0	8	3	8	9	4	1	6	1	4	2	6	3	3	3	1	2	0	0	0	0	3	0	2	0	0	0	3	0	0	2	0	0	3	3	0	1	0	3	0	1	0	1.718	77.5	26.2576	0	2175	2175
1	20.1314		5	3	9	8	6	1	9	1	5	9	3	3	4	3	1	3	0	0	0	1	0	0	0	0	0	3	0	3	3	3	0	0	0	0	3	1	0	2	0	0	0	1.588	47	18.6379	0	840	840
1	23.2389	0	6	3	8	9	1	8	7	2	3	6	3	3	3	3	1	0	0	3	0	3	0	0	0	0	0	0	0	0	0	0	0	0	0	0	3	0	0	0	0	0	0	1.54	60.6	25.5524	120	1720	1840
1	19.7947	0	5	4	1	9	6	2	8	1	3	8	3	3	3	4	1	3	0	0	1	2	0	0	0	0	0	0	0	0	0	0	3	0	0	3	0	0	0	0	0	0	0	1.67	58.9	21.1194	840	2100	2940
1	22.423	0	5	2	9	9	9	1	9	2	3	2	2	4	4	4	1	3	0	0	0	0	3	0	3	3	0	3	3	0	3	0	0	3	0	3	3	0	0	0	3	0	0	1.643	53.6	19.8559	0	840	840
1	22.9158	0	8	5	1	9	6	2	7	3	8	4	5	4	7	6	9	0	0	0	0	0	0	0	0	0	0	0	0	0	0	0	0	0	0	3	0	0	0	0	0	0	0	1.655	54.2	19.7881	0	960	960
1	23.0828	0	3	2	9	8	6	5	8	1	4	8	3	3	3	3	1	0	0	0	0	0	2	1	0	0	0	0	3	0	0	0	0	0	3	1	0	0	0	0	0	0	0	1.653	56.4	20.6411	2100	3780	5880
1	22.6557	0	7	3	9	8	8	1	9	1	5	1	3	3	3	3	1	3	0	0	0	0	0	0	0	0	0	0	0	0	0	0	0	3	0	0	0	0	0	0	0	0	0	1.474	50.3	23.1512	0	1860	1860
1	22.412	0	7	8	2	4	3	1	5	2	8	7	2	3	4	2	1	3	1	2	0	1	0	2	0	0	0	0	0	0	0	1	2	0	0	1	0	0	0	0	0	1	0	1.569	45.2	18.3608	260	1170	1430
1	20.846	0	5	4	9	8	3	1	5	1	3	9	5	5	3	3	1	3	0	1	0	0	0	0	0	0	0	0	0	0	0	0	0	0	3	0	0	3	3	0	0	0	0	1.645	74.8	27.642
1	22.9377	0	5	1	8	9	4	8	2	8	5	1	2	3	3	3	1	0	0	0	0	0	0	0	0	2	0	0	0	0	0	0	0	0	2	0	0	0	0	0	0	0	0	1.704	65.8	22.6614	30	3810	3840
1	23.2799	0	3	5	8	9	7	4	6	2	3	4	9	5	7	4	1	3	0	0	0	0	0	0	0	0	0	0	0	0	0	0	0	0	3	0	0	0	3	0	0	0	0	1.692	107.1	37.4101	2100	2760	4860
1	22.7296	0	6	3	8	8	5	2	2	1	4	8	1	2	4	4	1	3	0	0	0	0	2	1	0	0	0	0	0	0	0	0	2	0	0	3	0	0	0	0	2	3	0	1.572	65	26.3032	60	330	390
1	20.3943	0	5	3	9	8	4	1	3	8	2	1	3	2	2	5	1	0	0	3	3	0	3	0	3	0	0	0	3	2	0	0	0	3	2	3	0	3	3	0	0	3	0	1.579	58.4	23.4233	0	2820	2820
1	23.2827	0	4	5	8	9	4	1	6	1	3	7	3	5	5	5	1	3	3	0	0	3	0	0	0	0	0	0	0	0	0	2	0	0	0	0	0	0	0	0	0	0	0	1.697	62.7	21.7723	360	3420	3780
1	19.603	0	6	3	9	7	5	1	8	2	4	9	3	4	5	4	1	0	3	2	0	0	0	0	0	0	0	0	0	2	0	0	0	0	0	0	0	0	0	0	0	0	0	1.556	51.7	21.3536	120	120	240
1	19.822	0	3	4	9	8	1	2	9	1	4	7	5	4	3	4	9	0	0	0	0	1	0	3	0	0	0	0	0	0	0	0	0	0	0	0	0	0	0	0	0	0	0	1.623	60.4	22.9298	50	1350	1400
1	20.3231	0	6	2	9	8	4	8	7	1	4	9	4	2	5	6	1	3	0	0	0	0	3	0	0	0	0	0	0	0	0	0	0	1	2	0	0	0	2	0	0	3	0	1.601	70.2	27.3876	0	3060	3060
1	20.0712	0	2	9	1	8	5	3	7	2	8	1	1	7	7	3	1	3	0	3	2	3	3	3	0	0	0	1	2	3	0	2	3	0	2	0	1	0	3	1	0	3	0	1.553	38	15.7558	0	1110	1110
1	20.3039	0	3	4	1	6	5	2	8	1	4	7	4	4	4	4	1	3	0	0	0	0	3	0	0	0	0	0	0	0	3	3	3	0	0	0	0	3	3	0	0	0	0	1.648	59.6	21.9448	0	1320	1320
1	20.9446	0	5	2	9	1	5	1	9	7	3	6	3	2	4	5	1	3	1	0	0	0	3	0	0	0	0	1	2	1	3	1	0	0	0	0	0	3	0	0	0	2	0	1.736	70.8	23.4927	180	1440	1620
1	22.4531	0	5	5	8	9	6	2	7	1	3	9	6	6	6	6	9	0	0	1	0	0	0	0	0	0	0	0	2	1	1	3	0	0	3	0	0	0	0	0	0	0	0	1.566	83	33.845
1	19.6112	0	2	5	1	9	6	2	8	1	6	1	4	5	5	5	1	0	0	0	3	3	0	1	0	0	3	0	0	0	0	0	0	3	0	0	3	0	3	0	0	0	0	1.668	66.6	23.9377
1	19.3703	0	7	4	8	9	3	1	6	2	5	1	2	3	5	4	9	0	0	0	0	1	3	0	0	0	0	0	0	3	0	3	0	0	0	3	0	1	0	0	0	3	0	1.579	48.4	19.4125	60	1590	1650
1	23.1732	0	6	4	1	8	7	2	6	1	5	8	7	5	9	4	9	0	0	3	3	0	3	0	0	0	0	0	3	0	0	0	0	0	0	3	0	0	1	3	3	0	0	1.597	98.1	38.4644	0	2880	2880
1	20.8925	0	7	2	8	9	1	9	8	1	3	9	2	2	2	2	1	0	0	0	0	0	3	0	3	0	0	0	3	0	0	0	3	0	3	0	0	0	3	3	0	0	0	1.406	67.9	34.3478
1	20.0055	0	5	4	8	1	5	2	9	3	5	8	4	6	6	7	1	3	0	0	0	2	3	0	2	0	0	0	3	3	0	0	0	0	3	3	0	2	3	3	0	0	0	1.631	60.3	22.6678	0	480	480
1	20.7611	0	1	5	8	1	4	6	3	8	5	1	5	5	5	5	1	3	0	0	0	3	0	0	0	0	0	0	0	0	0	0	0	0	0	3	0	0	0	0	0	0	0	1.728	62.5	20.9311	120	1380	1500
1	21.4018	0	6	4	8	7	3	1	6	2	5	9	3	4	4	4	1	3	0	0	0	0	3	0	0	0	0	0	0	2	0	0	0	0	1	3	0	0	0	0	0	0	0	1.58	54.3	21.7513
1	20.7666	0	4	3	9	8	7	1	5	1	4	9	3	3	3	3	1	3	0	0	1	0	3	0	0	0	0	0	2	0	0	0	0	0	0	3	0	0	0	0	0	3	0	1.642	66.7	24.7389	0	1020	1020
1	21.3908	0	11	5	9	8	7	1	8	1	3	2	3	5	5	5	9	3	0	0	1	3	3	0	0	0	0	0	0	0	0	0	3	0	3	0	0	1	3	1	0	3	0	1.602	58	22.5997	40	2700	2740
1	20.9309	0	2	4	1	9	5	2	8	2	4	9	4	4	5	3	9	0	0	1	0	0	0	0	0	0	0	0	2	0	0	0	0	0	2	0	0	0	0	0	0	0	0	1.568	69.8	28.3899	60	3044	3104
1	22.5763	0	5	4	9	7	6	1	9	1	6	1	1	3	4	4	1	0	0	0	2	0	0	0	0	0	0	0	0	0	0	0	0	0	0	3	0	0	0	0	0	0	0	1.604	55.4	21.5328	60	2750	2810
1	22.4038	0	8	6	8	1	8	1	5	1	3	1	4	4	4	4	1	0	0	0	1	3	2	0	0	0	0	0	0	0	1	1	0	0	3	0	0	0	0	0	0	3	0	1.589	56.2	22.2581	0	2610	2610
1	20.3587	0	5	4	8	1	5	1	4	2	8	1	4	4	4	4	1	3	0	0	0	0	3	0	0	0	0	0	0	0	0	0	0	0	0	0	0	0	0	0	0	0	0	1.634	65.5	24.5322
1	22.7899	0	8	3	9	9	5	1	6	1	4	1	4	3	3	3	1	3	0	0	0	0	0	0	0	0	0	0	0	0	0	0	0	0	0	2	0	0	0	0	0	0	0	1.653	63.5	23.2396	0	2940	2940
1	22.486	0	5	5	1	9	8	4	6	2	1	4	5	5	6	8	1	2	0	0	0	0	0	0	0	0	0	0	0	0	0	0	0	0	3	3	0	0	0	0	0	0	0	1.615	61.5	23.5793	720	160	880
1	19.781	0	6	2	9	8	4	9	3	1	5	1	2	4	2	1	1	3	3	3	0	0	0	0	3	0	0	0	3	3	0	0	0	3	0	3	0	0	3	0	0	0	0	1.552	48.2	20.0108
1	20.3422	0	8	2	9	1	2	1	8	1	2	8	4	3	4	2	1	3	0	0	0	0	1	0	0	0	0	3	3	1	0	2	0	0	0	3	0	0	0	3	0	0	0	1.601	55	21.4575	90	2520	2610
1	21.2649	0	8	2	8	4	4	8	7	1	4	6	4	4	4	2	9	3	2	0	0	0	0	0	0	0	0	0	3	0	0	0	0	0	0	0	0	0	0	0	0	0	0	1.768	71.8	22.9699	750	2790	3540
1	18.9952		3	1	8	3	4	8	1	2	1	8	1	1	1	1	1	3	0	0	2	0	0	0	0	0	0	0	0	0	0	0	0	0	0	0	3	0	0	0	0	0	0	1.621	52.9	20.1321
1	21.8042	0	10	3	9	2	5	8	9	1	3	9	8	2	3	2	1	3	0	0	0	0	1	0	0	0	0	0	0	0	0	0	1	0	0	0	0	0	0	0	0	0	0	1.685	99	34.8687	0	600	600
1	19.7563	0	3	2	8	3	4	9	8	1	3	9	4	6	5	7	1	3	0	0	0	0	1	0	1	0	0	0	0	0	0	0	0	0	0	0	0	0	0	0	0	0	0	1.681	52.7	18.6498
1	19.4442	0	3	4	8	1	5	7	8	1	4	5	3	5	3	3	1	0	0	0	0	3	3	3	3	0	0	0	3	3	0	0	0	0	0	3	3	0	0	0	0	0	0	1.647	56.7	20.9024
1	18.757	0	5	1	9	9	4	1	7	1	2	8	3	2	2	2	1	1	0	0	0	0	3	1	2	0	0	0	0	0	0	0	0	0	3	3	0	1	0	0	0	0	0	1.692	65.3	22.8093	120	2520	2640
1	20.7775	0	5	1	9	8	4	7	6	2	5	3	2	1	3	2	1	3	0	0	0	0	3	0	0	0	0	0	3	0	0	0	0	0	3	3	0	0	0	0	0	0	0	1.545	78.1	32.7186
1	20.9829	0	5	3	9	9	6	9	3	1	2	9	4	3	3	3	1	2	0	1	0	0	3	3	0	0	0	0	3	0	0	1	0	1	0	3	0	0	0	2	0	0	0	1.542	67.4	28.346	0	1275	1275
1	18.8693	0	6	4	1	9	6	8	3	1	5	9	4	5	2	3	1	0	0	0	0	0	3	0	0	0	0	0	0	0	0	0	3	0	0	3	0	0	3	0	0	0	0	1.534	49.5	21.0356	0	1800	1800
1	20.0219	0	5	3	8	1	4	9	8	1	4	1	3	4	4	4	1	3	0	3	0	3	3	0	0	0	0	0	3	0	0	0	3	3	3	3	0	0	0	0	0	0	0	1.71	58.5	20.0062
1	18.5818	0	7	3	8	9	4	1	8	1	6	1	2	2	2	2	1	0	1	0	0	0	3	0	0	1	1	0	3	0	0	0	0	0	0	0	0	0	0	0	0	0	0	1.685	54.5	19.1954
1	18.4422	0	2	3	8	1	2	9	8	1	5	8	3	3	4	3	1	0	0	0	0	0	0	0	0	0	0	0	0	0	0	0	0	0	3	0	0	0	0	0	0	0	0	1.606	64.3	24.9299
1	20.1205	0	8	3	1	8	7	1	8	1	4	9	7	3	3	3	1	3	0	3	0	0	0	0	3	0	0	0	0	0	3	0	0	0	3	0	0	0	0	0	0	0	0	1.605	88.3	34.2776	120	5208	5328
1	22.1574	0	6	4	9	8	3	1	5	1	3	8	3	2	3	1	1	3	0	0	0	0	3	0	0	0	0	0	0	0	0	3	0	0	3	3	0	0	0	3	0	0	0	1.605	68.2	26.4749	0	2955	2955
1	21.9083	0	5	3	8	7	1	2	8	1	4	1	1	3	3	3	1	2	3	0	3	0	0	3	1	0	0	2	0	3	0	0	3	0	0	0	0	0	0	0	0	0	0	1.731	63.7	21.2591	840	795	1635
1	21.3279	0	3	3	8	9	2	9	5	8	3	9	3	3	3	3	1	3	0	0	0	0	0	0	0	0	0	0	0	0	0	0	3	0	0	0	0	0	0	3	3	3	0	1.58	49.9	19.9888
1	20.5092	0	6	2	9	8	4	6	8	1	2	9	4	1	4	4	1	3	0	1	0	1	3	0	0	0	0	0	3	0	0	0	1	0	0	3	0	0	0	0	0	0	0	1.66	55	19.9594	0	180	180
1	21.6756	0	5	4	8	8	1	9	3	1	5	9	4	3	5	5	1	0	0	0	0	0	2	1	0	0	0	3	2	0	0	0	3	0	0	3	0	0	0	0	0	0	0	1.706	64.6	22.196	2160	210	2370
1	19.5236	0	5	5	1	1	9	3	8	1	3	6	4	4	4	4	9	3	0	0	0	0	0	0	0	0	0	0	0	1	0	0	0	0	3	0	0	0	0	0	0	0	0	1.563	60.4	24.724	60	4170	4230
1	21.8563	0	8	3	8	9	2	1	3	9	4	9	3	3	1	1	1	3	0	0	0	0	2	0	0	0	0	0	1	0	0	0	1	0	0	0	0	0	0	0	1	0	0	1.559	70.2	28.8832	0	3185	3185
1	21.7659	0	2	2	8	9	4	1	3	1	7	4	7	3	3	3	1	3	0	0	3	3	0	0	0	0	0	0	3	0	3	3	0	0	3	3	0	0	3	0	0	0	0	1.599	81.5	31.8758	210	2220	2430
1	18.3874	0	5	3	8	9	1	7	6	2	4	7	5	3	5	2	1	0	0	3	2	0	0	0	0	0	1	0	0	0	2	0	0	0	3	0	0	3	0	0	0	3	0	1.65	66	24.2424	1260	420	1680
1	21.8316	0	5	5	1	8	4	2	9	1	5	1	3	2	3	4	1	0	3	2	3	3	0	0	0	0	0	0	0	0	0	0	0	0	1	0	0	0	0	0	0	3	0	1.543	50	21.0009	180	140	320
1	18.8665		5	4	9	6	3	1	9	1	4	8	6	1	2	6	9	1	0	0	0	3	0	2	0	0	0	0	0	0	0	0	0	0	1	0	2	0	0	0	0	2	0	1.396	48.3	24.7843	240	840	1080
1	20.4791	0	6	3	8	9	5	2	7	1	4	9	4	5	4	4	1	0	3	0	0	0	0	3	0	0	0	0	0	0	0	0	0	0	0	0	0	0	0	0	0	0	0	1.644	78.9	29.1926	120	1020	1140
1	19.0171	0	5	5	1	9	7	2	6	1	3	4	2	2	4	2	1	0	1	0	0	0	3	3	0	0	0	0	2	0	0	2	0	1	3	3	0	0	0	3	0	0	0	1.58	57.2	22.913
1	21.232	0	4	4	8	9	3	1	7	2	7	3	3	4	5	2	1	0	3	0	0	0	3	0	0	0	0	3	0	0	0	0	0	0	0	0	0	3	0	0	0	0	0	1.608	64.8	25.0613	0	1200	1200
1	21.4784	0	4	3	9	6	5	6	8	1	3	9	3	2	5	2	1	3	0	0	0	0	0	0	0	0	0	0	2	0	0	0	0	0	0	3	0	3	0	2	0	0	0	1.591	64.7	25.5602	205	495	700
1	22.0123	0	3	3	8	9	3	8	3	1	5	8	3	5	3	3	1	0	0	0	0	0	3	3	0	3	3	0	0	0	0	1	0	0	0	0	0	0	0	0	0	0	0	1.592	54.4	21.4641	0	1320	1320
1	19.7344	0	6	3	9	7	4	1	2	9	5	1	4	3	4	3	1	3	0	1	0	0	0	0	2	0	0	0	0	1	0	0	0	0	0	0	0	0	0	0	0	0	0	1.606	62.1	24.0769	0	2160	2160
1	19.1951	0	5	6	1	8	9	3	7	2	8	1	2	6	4	6	1	3	0	2	0	0	3	1	0	0	0	0	2	3	0	1	2	0	3	3	0	0	0	0	0	3	0	1.62	53.3	20.3094
1	21.8207	0	3	3	9	1	2	7	2	8	4	7	6	4	3	1	9	2	0	3	3	0	0	0	0	0	0	0	0	0	0	0	0	0	0	0	0	0	3	3	3	0	0	1.536	65	27.5506	240	736	976
1	21.4319	0	5	2	9	8	3	1	6	9	2	9	2	2	3	3	1	3	1	0	0	0	0	0	0	0	0	0	1	2	0	0	0	0	0	1	0	0	0	0	1	1	0	1.562	44.4	18.1979	0	2130	2130
1	19.7071	0	7	2	9	1	7	5	8	3	4	6	2	2	3	2	1	3	0	0	0	0	0	0	0	0	0	0	0	1	0	0	0	0	0	0	0	0	0	0	0	0	0	1.725	56.9	19.122
1	18.0753	0	7	4	8	9	7	1	5	1	4	2	4	4	4	4	1	3	0	2	0	1	3	0	0	0	0	0	0	0	0	0	0	0	3	3	0	0	0	0	0	0	0	1.51	55.8	24.4726
1	18.3272	0	6	3	8	9	2	9	3	1	2	9	3	3	2	2	1	3	0	0	0	0	3	3	0	0	3	3	0	0	0	0	0	0	3	3	0	0	3	0	3	0	0	1.678	72.5	25.7486
1	21.1636	0	6	4	9	8	4	9	9	2	3	1	4	4	3	4	1	0	0	0	0	0	3	0	0	0	0	0	3	0	0	0	0	0	2	3	0	0	0	0	0	0	0	1.67	73.2	26.2469	0	1440	1440
1	20.7611	0	9	3	9	8	2	1	7	1	4	7	4	3	9	5	1	3	0	0	0	0	3	0	0	0	0	0	3	0	0	0	0	0	3	2	0	3	0	0	0	0	0	1.581	82.2	32.8858	0	1330	1330
1	21.5277	0	5	2	8	1	3	8	4	1	3	7	4	3	3	3	1	0	0	0	1	3	0	1	0	1	0	0	0	0	0	0	0	0	3	0	0	0	0	0	0	0	0	1.589	74.4	29.4663	60	2310	2370
1	19.7919	0	10	3	1	9	3	1	8	1	3	1	3	6	3	3	9	3	0	0	2	0	3	0	0	0	0	0	0	1	0	0	0	0	0	0	0	0	0	0	0	0	0	1.593	51	20.0973	0	1330	1330
1	21.3552	0	11	4	9	1	6	2	6	1	7	1	4	4	4	4	9	3	0	0	0	0	0	0	0	0	0	0	0	0	0	0	0	0	1	0	0	0	0	0	1	0	0	1.668	54.7	19.6605
1	20.7502	0	4	5	7	8	9	1	6	2	4	6	4	5	3	5	9	3	1	0	0	3	0	1	0	0	0	0	0	0	0	0	2	0	0	3	0	3	0	0	0	0	0	1.599	55.4	21.6677	1680	900	2580
1	19.5838	0	4	3	8	9	9	1	9	1	3	1	3	3	4	4	1	3	0	0	0	0	3	0	0	0	0	0	3	0	0	0	0	0	3	3	0	0	0	0	0	0	0	1.556	52.5	21.684	0	730	730
1	21.3087	0	11	7	1	8	6	2	8	1	8	1	3	5	5	5	9	3	0	0	0	0	0	0	0	0	0	0	3	0	0	0	0	0	0	0	0	0	0	0	0	0	0	1.556	51.3	21.1884	0	240	240
1	18.9925	0	5	4	8	9	6	8	9	1	5	9	4	4	4	4	1	3	0	0	0	0	0	1	0	3	0	0	0	0	1	0	0	0	0	1	0	0	0	0	0	0	0	1.681	60	21.2332
1	21.0897	0	7	3	8	9	6	9	1	9	4	9	4	3	3	3	9	2	0	0	0	0	3	0	0	0	0	0	3	0	0	0	0	0	0	3	0	0	0	3	0	0	0	1.628	77.7	29.3165	0	1680	1680
1	18.4887	0	5	3	8	1	5	4	8	1	3	1	3	3	3	3	1	3	0	0	0	0	3	0	0	0	0	0	0	0	0	0	0	0	0	0	0	0	0	0	0	2	0	1.562	53.3	21.8457
1	19.0281	0	5	2	9	8	3	1	4	9	4	9	3	1	4	3	1	0	0	0	0	0	1	0	0	0	0	0	0	0	0	0	0	0	1	1	0	0	0	0	0	0	0	1.535	63.2	26.8226
1	18.2259	0	9	3	1	9	4	8	9		4	7	9	6	6	6	1	0	3	3	3	0	0	0	0	0	0	0	0	0	0	0	3	0	3	0	0	3	0	0	0	0	0	1.614	87.5	33.5893
1	21.3005	0	8	8	8	8	6	1	4	4	2	9	3	4	3	3	1	0	0	0	2	0	0	0	0	0	0	0	0	0	0	0	0	0	0	0	0	0	0	0	0	0	0	1.563	55	22.5136
1	19.5072	0	8	4	9	1	5	7	4	1	6	2	5	6	6	7	1	3	0	0	0	0	3	0	0	0	0	0	1	0	2	0	0	0	0	0	0	1	0	0	0	0	0	1.71	56.1	19.1854
1	20.9637	0	9	6	8	9	2	8	4	9	2	9	6	3	3	3	1	3	2	1	0	0	2	1	0	0	0	2	0	0	1	1	2	0	0	0	0	0	0	0	2	0	0	1.565	80.3	32.7859	0	1302	1302
1	19.6304		11	3	8	9	5	1	7	6	1	9	2	3	3	3	1	3	0	0	0	3	0	0	0	0	0	0	0	3	0	0	0	3	0	0	0	3	3	0	3	0	0	1.569	42.7	17.3453	0	300	300
1	19.1321	0	5	4	8	1	8	1	9	1	4	1	2	4	1	7	9	3	0	3	0	3	3	0	0	0	0	0	3	0	0	0	0	0	3	0	0	0	3	0	0	0	0	1.623	39.6	15.0334
1	18.3463	0	6	4	9	2	1	5	9	1	9	1	3	4	4	4	1	3	0	0	0	3	3	0	0	0	0	0	0	0	0	2	0	0	0	3	0	0	0	0	0	3	0	1.54	49	20.6612
1	20.4736	0	4	4	9	5	4	2	9	2	4	2	4	4	5	7	1	0	0	0	0	0	0	0	0	0	0	0	0	0	0	0	0	0	0	0	0	0	0	0	0	0	0	1.47	52.3	24.2029	0	3850	3850
1	18.8392	0	4	9	1	5	8	7	6	1	2	1	3	3	5	2	1	0	1	0	0	3	2	0	0	0	2	3	3	0	3	2	0	0	0	3	2	3	0	0	0	0	0	1.527	44.4	19.0417
1	20.7283	0	6	3	1	4	5	6	9	6	2	8	3	3	2	3	1	3	0	0	2	0	0	0	0	0	0	3	0	0	0	0	0	0	0	0	0	0	0	0	0	0	0	1.552	48.7	20.2183
1	19.3265	0	5	2	9	8	6	1	7	2	5	1	4	3	3	3	1	0	3	0	0	0	3	3	0	0	0	0	0	0	0	0	3	0	3	0	3	3	0	0	0	0	0	1.631	53.8	20.2243
1	20.0383	0	5	2	9	5	6	7	3	1	4	8	9	4	3	4	1	3	0	0	0	0	3	0	0	0	0	0	0	0	0	0	0	0	0	0	0	0	0	0	0	3	0	1.56	84.1	34.5579	730	220	950
1	20.3532	0	10	2	9	5	2	8	3	1	2	9	4	2	4	2	1	3	0	0	0	0	3	0	0	0	0	0	0	0	0	0	0	0	0	0	0	0	0	1	0	3	0	1.542	65.2	27.4207	0	930	930
1	19.5537	0	6	3	9	8	3	1	8	1	3	5	2	5	5	5	1	0	2	0	0	3	0	0	1	0	2	0	0	3	0	0	0	0	2	2	0	0	0	2	0	3	0	1.722	56.4	19.0201
1	18.5298	0	4	6	9	8	7	6	5	1	5	2	5	5	5	5	1	3	0	0	0	0	3	1	0	0	0	0	3	0	0	3	0	0	3	0	0	0	0	0	0	0	0	1.659	59.2	21.5094	0	2740	2740
1	19.5647	0	6	6	1	8	6	9	8	1	7	3	4	5	5	6		0	3	0	2	0	3	3	0	0	0	1	2	0	3	0	0	0	3	0	2	3	0	0	0	3	0	1.697	69	23.9599	0	1920	1920
1	19.6085	0	6	4	9	8	4	3	5	1	6	9	4	5	4	4		0	0	0	0	0	3	0	0	0	0	0	0	0	0	0	3	0	0	0	0	0	0	0	0	2	0	1.66	58.4	21.1932	0	0	0
1	21.3552	0	6	8	9	7	5	2	7	3	9	8	5	3	3	5	1	0	3	0	0	1	3	0	0	0	0	0	0	0	0	3	3	0	0	3	0	0	0	0	0	0	0	1.616	55.3	21.1759	0	420	420
1	20.3833	0	5	5	9	7	2	8	6	8	3	9	5	1	5	2	1	3	0	0	0	0	3	0	3	0	0	0	3	0	0	0	0	0	0	0	0	0	0	0	0	3	0	1.651	64.9	23.8095	0	3180	3180
1	18.4203	0	6	3	9	8	4	1	3	1	4	1	4	3	5	5	1	1	0	3	0	0	3	0	0	0	0	3	1	1	0	0	3	3	0	1	0	0	3	0	0	0	0	1.657	73.6	26.806
1	19.9507	0	4	5	1	9	8	2	8	1	6	1	4	5	5	5	9	3	0	0	0	0	0	0	0	0	0	0	0	0	0	0	0	0	3	0	1	0	0	0	0	0	0	1.765	64.6	20.7369	0	1720	1720
1	20.5558	0	5	2	9	3	4	8	3	7	6	9	7	2	3	4	1	3	0	0	0	0	3	0	2	0	0	0	0	0	0	0	0	0	0	3	0	0	0	0	0	0	0	1.614	81.4	31.2476	210	1490	1700
1	18.9021	0	6	6	1	8	6	9	7	1	3	9	7	7	6	3	9	3	0	0	3	0	0	2	0	0	0	1	3	0	3	3	3	0	0	0	0	1	0	0	0	3	0	1.59	61.3	24.2475	1280	1040	2320
1	18.9733	0	8	1	9	8	7	2	9	1	4	1	5	3	9	3	1	3	3	0	3	0	0	3	0	0	0	0	0	0	0	0	0	0	3	0	0	0	3	0	0	0	0	1.616	63.5	24.3159
1	20.501	0	6	3	8	9	9	4	2	9	2	9	2	2	2	2	1	1	0	2	0	0	0	0	0	0	0	0	0	2	0	0	0	0	0	3	3	0	0	0	0	0	0	1.633	55.4	20.7748
1	20.0055		10	2	8	7	4	5	8	1	2	8	4	3	3	3	1	0	0	0	0	0	0	1	0	0	0	0	3	0	0	0	2	0	0	3	0	0	0	0	0	0	0	1.591	71.7	28.3256	0	818	818
1	19.8083	0	5	4	9	1	8	2	7	2	1	8	4	2	2	2	1	3	0	3	0	1	3	0	2	0	0	0	3	0	0	0	0	0	2	3	0	0	1	3	0	0	0	1.675	70.4	25.0924	140	3152	3292
1	18.9185	0	7	4	8	8	4	2	4	8	2	8	4	4	4	4	1	0	0	3	3	0	0	0	0	0	0	0	0	0	0	0	0	1	0	0	1	0	3	0	0	0	0	1.604	62.3	24.2147	0	900	900
1	20.9856	0	5	3	8	9	3	5	9	1	5	1	2	2	2	2	1	3	3	2	2	0	3	0	3	0	0	0	3	3	0	0	3	0	3	0	0	0	0	0	3	0	0	1.613	45.5	17.4881	90	1750	1840
1	19.4497	0	7	4	1	8	6	3	6	1	7	9	4	5	3	3	1	0	0	3	0	3	3	0	0	0	0	0	3	0	0	0	0	0	0	0	0	0	0	0	0	0	0	1.61	55	21.2183
1	18.8309	0	7	6	8	1	2	1	9	3	2	8	4	4	5	2	1	3	0	0	0	0	0	0	0	0	0	0	0	0	0	0	0	0	0	0	0	0	0	0	0	0	0	1.574	62.9	25.3887
1	18.6064	0	3	1	9	7	5	8	2	1	4	7	3	1	4	1	1	3	0	0	0	0	1	0	0	0	2	0	0	0	0	0	0	0	0	0	0	0	0	1	0	0	0	1.574	59.8	24.1375	30	2460	2490
0	23.1841	0	11	4	9	1	4	9	2	8	4	8	4	4	4	4	1	3	0	0	0	0	0	0	0	0	0	0	1	0	0	1	0	0	0	1	0	0	0	0	0	0	0	1.545	67.8	28.4036	0	90	90
0	23.1047	0	8	4	9	9	3	8	4	1	3	9	6	4	4	4	1	3	0	0	0	0	0	0	0	0	0	0	0	0	0	0	0	0	0	0	0	0	0	2	0	1	0	1.542	65.4	27.5048	0	150	150
0	21.9822		6	2	9	1	8	1	7	1	4	9	9	3	4	4	9	3	0	0	0	0	0	0	0	0	0	0	0	0	0	0	0	0	0	0	0	0	0	0	0	2	0	1.614	106.1	40.7294	150	285	435
0			10	3	9	8	3	2	7	1	2	9	3	3	5	3	1	3	0	0	0	0	0	0	2	0	0	0	0	1	0	0	0	0	0	2	0	0	0	0	0	0	0	1.659	52.4	19.0388	600	145	745
0	22.0917	0	11	4	1	9	4	9	6	1	5	9	4	5	5	4	1	3	0	0	0	0	3	0	2	0	0	0	0	1	1	1	0	0	0	1	1	0	0	0	0	0	0	1.553	51.2	21.2289	0	0	0
0	22.2971	0	11	4	8	1	6	1	7	1	4	1	4	4	4	4	1	0	0	0	0	0	0	2	0	0	0	0	0	0	0	0	0	0	0	3	0	0	0	0	0	0	0	1.562	58.8	24.0999	0	0	0
0	22.0671	0	12	4	9	9	4	1	4	1	4	9	3	4	4	4	1	3	0	3	0	0	0	0	0	0	0	0	0	0	0	0	0	0	0	0	0	0	0	0	0	3	0	1.511	47.2	20.6735	0	960	960
0	22.0643	0	6	4	9	9	4	9	4	1	4	9	3	4	4	4	1	0	0	0	0	0	3	0	0	0	0	0	0	0	0	0	0	0	0	0	0	0	0	0	0	0	0	1.587	49.9	19.8128	0	810	810
0	21.963	0	9	3	9	9	3	1	9	1	4	9	3	4	4	4	1	3	0	0	0	0	0	0	3	0	0	0	0	3	0	3	0	0	0	0	2	0	0	0	0	0	0	1.552	45	18.6822	0	80	80
0	22.2067	0	8	4	9	9	4	1	7	1	4	1	8	4	5	4	1	1	0	0	0	0	0	0	0	0	0	0	0	0	0	0	0	0	0	1	0	0	0	0	0	1	0	1.576	67.3	27.0958	0	690	690
0	21.9767	0	10	3	1	9	3	9	4	1	9	8	3	3	2	2	1	3	0	0	0	0	0	0	0	0	1	0	3	0	0	0	0	0	0	0	0	0	0	0	0	0	0	1.621	49.3	18.7621	0	520	520
0	22.6639	0	6	4	9	8	4	1	3	7	4	9	4	3	6	2	1	3	0	0	0	0	3	0	0	0	0	0	0	0	0	0	0	1	0	3	0	0	0	0	0	3	0	1.648	66.5	24.4854	0	810	810
0	22.2149	0	8	4	9	8	3	9	4	1	3	1	5	3	4	4	1	3	0	0	0	0	0	0	0	0	0	0	0	0	0	0	0	0	0	0	0	0	0	0	0	3	0	1.625	66.5	25.1834	0	210	210
0	21.9959	0	8	5	1	9	3	8	7	1	5	2	3	4	4	5	1	1	0	3	0	0	0	2	0	0	0	0	0	0	0	0	0	0	0	0	0	1	0	0	0	3	0	1.64	52.8	19.6312	180	690	870
0	22.3326	0	8	7	1	1	1	9	4	1	4	9	7	4	4	4	9	3	0	1	0	0	0	0	0	0	0	0	1	0	0	0	0	0	0	0	0	0	0	0	0	0	0	1.576	79	31.8064	0	0	0
0	21.9658		7	5	9	1	4	7	9	1	4	1	6	4	5	5	1	3	0	1	1	0	0	0	0	0	0	0	0	0	0	0	0	0	1	3	0	1	0	0	0	0	0	1.577	62.5	25.1314	0	150	150
0	22.9897	0	10	3	9	8	4	9	3	9	2	9	3	2	4	3	1	3	1	0	0	2	0	2	0	0	0	0	2	0	0	3	0	0	0	2	0	0	0	0	0	0	0	1.641	66.6	24.7319	0	160	160
0	22.1109	0	9	4	9	9	2	9	5	1	4	9	4	4	3	4	1	1	0	0	0	0	0	0	0	0	0	0	0	0	0	0	0	0	0	2	0	0	0	0	0	0	0	1.595	58.5	22.9951	0	420	420
0	22.9952	0	8	5	2	9	6	1	9	1	8	4	7	8	7	4	9	0	0	3	0	3	0	0	3	0	2	0	0	0	0	1	0	0	1	0	0	3	0	0	0	0	0	1.691	85.6	29.9355	0	420	420
0	22.9049	0	10	4	9	8	6	1	9	1	5	2	6	4	4	4	1	2	1	0	1	0	0	2	0	0	0	0	0	0	0	1	1	0	0	3	0	0	0	0	0	0	0	1.57	63.3	25.6806	0	600	600
0	23.0034	0	6	4	9	1	3	5	4	1	5	7	4	5	4	5	1	0	0	0	0	0	0	0	3	0	0	0	0	2	0	0	0	0	0	0	2	1	0	0	0	0	0	1.571	49.3	19.9754	0	450	450
0	22.9569	0	9	4	9	1	7	2	8	2	6	1	6	5	9	4	9	3	0	0	1	0	0	1	0	0	0	0	0	0	0	1	0	0	0	2	0	0	0	1	0	0	0	1.498	67.2	29.9465	0	3060	3060
0	22.308	0	10	3	9	1	4	9	8	1	5	8	5	4	3	2	1	3	0	2	0	0	0	0	0	0	0	2	0	0	2	0	2	0	0	2	0	1	0	0	0	0	0	1.56	61.2	25.1479	0	700	700
0	22.0835	0	11	2	9	6	4	7	1	5	3	9	6	2	3	3	1	3	3	0	0	0	3	0	0	0	3	3	0	0	3	3	0	3	0	0	0	0	0	0	3	3	0	1.516	62.9	27.3686	0	0	0
0	22.7652	0	8	5	9	2	6	7	4	1	3	8	5	4	3	4	1	3	1	0	0	3	0	0	3	0	0	0	3	0	0	0	0	0	0	3	0	0	0	0	0	3	0	1.637	51.3	19.1434	360	600	960
0	22.0342	0	11	3	8	9	5	8	6	1	4	9	5	2	4	2	1	3	0	2	0	0	0	0	0	0	0	0	3	0	0	0	0	0	3	3	0	3	3	3	0	3	3	1.592	68.2	26.909	180	425	605
0	23.0691	0	8	4	9	9	2	1	7	1	4	9	4	6	4	6	1	0	0	0	0	0	0	0	0	0	0	0	0	1	1	3	0	0	1	3	0	0	2	0	0	3	0	1.479	47.7	21.8063	0	1500	1500
0	22.0479	0	10	2	9	8	4	7	1	2	4	8	4	3	2	4	1	3	0	3	0	0	0	1	0	0	0	0	0	0	0	0	0	0	0	0	0	0	0	0	0	0	0	1.529	62.5	26.7341	270	1050	1320
0	22.0835	0	9	3	1	5	6	7	8	2	3	1	6	4	6	6	9	0	0	0	0	0	2	0	0	0	0	0	1	0	0	0	0	0	0	0	0	0	0	0	0	0	0	1.562	78.3	32.0922	0	2940	2940
0	22.0096	0	5	3	9	9	4	9	4	1	4	9	9	4	7	7	9	3	0	0	1	0	2	0	0	0	1	3	0	0	3	0	0	0	1	1	0	0	2	0	0	2	0	1.569	81.9	33.2689	0	0	0
0	22.0096	0	9	4	1	9	8	9	6	1	4	9	6	4	7	4	1	0	3	0	0	0	0	0	2	0	0	0	0	1	1	0	0	0	0	0	1	0	0	0	0	1	0	1.605	55.7	21.6225	0	175	175
0	23.2717	0	12	4	9	9	4	1	4	1	3	9	4	4	4	4	1	1	0	0	0	0	0	0	0	0	0	0	0	0	0	0	1	0	0	3	0	0	0	0	0	0	0	1.657	62	22.5812	0	60	60
0	22.1739	0	9		2	9	9	2	9	7	1	2	9	2	3	4	1	3	0	0	0	1	0	0	3	0	0	0	1	3	0	3	0	0	0	0	3	0	0	0	0	0	0	1.659	49.9	18.1304	0	360	360
0	23.4168	0	7	4	9	1	6	1	8	2	6	1	8	5	8	8	9	0	0	0	0	0	0	0	0	0	0	0	0	0	0	0	0	0	0	3	0	0	0	0	0	0	0	1.643	77.3	28.6355	0	1060	1060
0	22.0178	0	10	3	9	1	5	1	6	1	4	9	3	3	5	3	1	3	0	0	1	0	0	0	0	0	0	0	0	0	0	0	0	0	0	0	0	0	0	0	0	0	0	1.53	45.7	19.5224	0	30	30
0	22.3135	0	11	4	1	9	4	9	5	1	4	9	3	4	4	3	1	0	0	2	1	0	1	0	1	0	0	0	0	2	1	0	0	0	1	1	1	1	0	0	0	1	0	1.602	50.9	19.8332	360	700	1060
0	22.0972	0	10	3	9	1	2	9	3	8	3	9	3	3	3	3	1	3	0	0	0	0	3	0	0	0	0	0	0	0	0	0	0	0	0	3	0	0	0	0	0	0	0	1.629	47.9	18.0507	0	1050	1050
0	22.0123	0	7	5	9	8	8	2	3	1	4	9	5	5	3	5	9	3	0	0	0	0	0	0	0	0	0	0	0	0	0	0	0	0	0	0	0	0	0	0	0	0	0	1.598	101.8	39.8652	0	472	472
0	23.3018	0	12	2	9	8	2	9	2	9	2	9	2	2	2	2	1	0	0	0	0	0	3	0	0	0	0	3	0	0	0	0	0	0	0	0	0	0	0	0	0	0	0	1.699	53.2	18.43	2400	60	2460
0	22.0479	0	8	1	8	2	4	5	9	1	2	3	4	3	4	1	1	2	0	3	0	0	0	0	0	0	0	0	0	0	0	0	0	0	0	0	0	0	0	0	0	0	0	1.522	54.2	23.3975	60	540	600
0	22.9569	0	8	3	9	8	5	9	5	1	3	9	4	4	3	4	1	3	0	0	0	0	1	0	0	0	0	0	0	0	0	0	0	0	0	3	0	0	0	0	0	0	0	1.534	56.8	24.1378	0	400	400
0	22.0753	0	7	3	9	9	3	9	9	1	3	9	3	3	3	3	1	0	0	0	0	0	0	0	0	0	0	0	0	0	0	0	0	0	0	0	0	0	0	0	0	0	0	1.679	55.3	19.6166	0	48	48
0	22.0917	0	13	3	1	9	6	1	5	1	3	1	3	3	3	3	1	1	0	0	0	0	0	0	2	0	0	0	0	2	0	0	0	0	0	2	0	0	0	0	0	1	0	1.695	49.4	17.1944	0	150	150
0	23.384	0	11	3	9	9	6	1	3	9	6	9	2	3	2	3	1	2	0	2	1	0	0	0	2	0	0	0	0	0	0	0	0	0	0	2	0	1	0	0	0	3	0	1.569	47.3	19.2139	0	200	200
0	22.13	0	9	3	9	9	3	9	9	1	3	9	6	3	3	3		3	1	0	0	0	0	0	1	0	0	3	3	0	3	3	0	0	0	3	0	0	0	0	0	0	0	1.52	65.7	28.4366	0	110	110
0	22.193	0	11	7	9	9	3	9	7	1	7	9	7	7	7	7	1	0	0	0	0	0	3	0	0	0	0	0	0	0	0	3	0	0	0	3	0	0	0	0	0	0	0	1.579	95.6	38.3437	0	1680	1680
0	23.0527	0	10	3	9	8	7	1	6	2	5	1	6	3	4	3	1	3	1	3	3	0	0	0	3	3	2	3	3	0	3	3	0	0	0	0	3	3	0	0	0	3	3	1.653	70.8	25.9112	0	1680	1680
0	22.0178		10	5	8	9	5	8	3	1	3	9	4	3	3	3	9	3	0	0	0	0	3	0	0	0	0	0	0	0	0	3	0	0	0	2	0	0	0	0	0	0	0	1.676	94.6	33.6778	0	170	170
0	23.0171	0	6	6	9	1	5	9	7	8	2	3	6	4	5	1	1	3	0	0	3	2	0	0	1	0	1	3	0	0	2	0	0	0	1	2	0	0	3	1	0	0	0	1.621	71.6	27.2488	0	720	720
0	22.0315	0	6	5	9	8	6	1	7	2	4	1	3	5	3	5	9	2	0	0	0	0	1	0	0	0	0	0	0	0	0	0	0	0	0	3	0	0	0	0	0	0	0	1.588	54.8	21.731
0	22.7899	0	6	3	9	8	2	1	5	7	4	1	4	2	3	1	1	3	0	0	0	0	0	0	0	0	0	0	0	0	0	0	0	0	0	1	0	0	0	0	0	0	0	1.558	64.2	26.4484	0	1050	1050
0	22.1875	0	10	4	1	9	4	9	8	9	4	1	3	3	2	2	1	3	0	0	0	0	0	0	2	0	0	0	0	0	0	2	0	0	0	2	2	0	0	0	0	0	0	1.536	59.9	25.3889	2880	210	3090
0	21.9384	0	9	3	9	8	4	1	3	1	3	9	4	3	3	3	1	3	0	1	0	0	3	0	0	0	0	0	0	0	0	3	0	0	0	3	0	0	0	0	0	0	0	1.625	64.9	24.5775	0	1206	1206
0	21.9357		7	5	1	9	5	8	6	1	4	8	4	3	6	3	9	0	0	0	0	0	1	0	0	0	0	1	0	0	0	2	0	0	0	0	0	0	0	0	0	3	0	1.566	53	21.6119	0	1890	1890
0	22.9076	0	11	4	9	1	4	1	9	2	9	1	5	5	3	5	1	2	0	0	0	2	0	0	0	0	0	0	0	0	0	2	0	0	0	0	0	0	0	0	0	0	0	1.549	68.2	28.4238	0	0	0
0	22.9952	0	7	3	9	7	3	9	4	1	6	1	5	3	5	3	1	0	0	0	0	0	0	1	0	0	0	1	0	0	0	0	0	0	1	0	0	0	0	1	0	0	0	1.5	61.9	27.5111	450	435	885
0	22.2669	0	5	5	1	9	9	1	5	1	5	9	9	6	6	9	9	3	2	0	0	0	3	3	1	0	3	2	3	0	0	3	3	3	2	2	2	2	0	3	0	0	0	1.615	136.9	52.4878	0	150	150
0	23.2909	0	11	3	9	8	5	7	3	1	4	1	5	4	4	4	1	0	0	1	1	0	3	0	0	0	0	0	1	0	0	0	0	0	0	3	0	0	0	0	0	0	0	1.604	65.8	25.5751	0	485	485
0	22.9432	0	10	2	9	9	6	9	5	1	2	9	5	2	4	4	1	3	1	0	0	2	0	0	3	0	3	3	0	3	1	3	0	1	1	2	3	0	0	0	0	0	0	1.558	45.5	18.7446	0	270	270
0	22.7844	0	11	4	1	9	8	7	9	1	5	1	4	4	3	9	1	0	0	1	0	0	3	0	3	0	0	0	1	0	0	0	2	0	0	0	3	0	0	0	0	0	0	1.513	51.5	22.4972	0	290	290
0	23.0883	0	9	4	1	9	4	1	4	1	6	9	7	4	4	4	1	2	0	0	1	0	3	0	0	0	0	3	3	0	0	0	0	0	0	0	0	0	0	0	0	0	0	1.557	91	37.5374	0	640	640
0	21.9795		8	5	1	9	4	2	8	1	4	8	6	5	7	2	9	1	0	2	2	0	0	0	0	2	0	0	0	0	0	0	0	0	0	1	0	0	0	0	0	3	2	1.556	70.3	29.036	0	100	100
0	22.6749	0	8	4	9	5	4	9	9	1	4	9	4	4	1	4	1	0	0	0	0	0	0	0	0	0	0	0	0	0	0	0	0	0	0	3	0	0	0	0	0	0	0	1.668	65.9	23.6861	0	540	540
0	22.7187	0	10	4	9	8	1	8	4	1	4	8	4	2	2	2	1	3	0	0	0	0	0	0	0	0	0	0	0	0	0	3	0	0	0	3	0	0	3	0	0	0	0	1.693	65.5	22.8522	90	280	370
0	22.5188	0	5	4	1	9	5	1	4	1	5	9	2	4	7	5	9	0	0	0	0	1	0	0	2	0	0	0	0	1	1	3	0	0	0	0	1	0	0	0	0	0	0	1.566	41.2	16.8002	0	990	990
0	23.0554	0	11	5	1	8	9	1	7	1	5	9	4	5	4	4	9	2	0	0	0	0	0	0	0	0	0	0	1	0	0	0	1	0	0	0	0	0	0	0	0	1	0	1.572	66.2	26.7888	0	60	60
0	22.7324	0	5	4	9	2	5	1	6	2	5	9	3	5	3	4	1	0	0	1	0	0	0	0	3	0	0	0	0	3	0	0	0	0	0	3	3	0	0	0	0	0	0	1.643	48.3	17.8925	0	240	240
0	22.4011	0	5	3	9	9	3	9	4	8	3	9	3	3	4	4	1	3	0	2	0	3	0	0	3	0	0	0	0	0	1	0	0	0	0	0	3	2	0	0	0	1	0	1.619	59.1	22.5473	0	420	420
0	23.8083	0	11	4	9	7	5	9	4	1	4	9	2	2	2	2	1	0	0	0	0	0	0	2	0	0	0	0	0	0	0	3	0	0	0	1	0	0	0	0	0	2	0	1.687	58.6	20.5905	0	70	70
0	22.1273	0	7	4	9	7	5	9	4	1	4	9	2	2	2	2	1	0	0	0	0	0	0	2	0	0	0	0	0	0	0	3	0	0	0	1	0	0	0	0	0	2	0	1.609	87.3	33.7211	0	2310	2310
0	22.6667	0	8	2	8	9	1	9	7	1	2	9	7	2	2	1	1	1	0	0	3	2	0	1	0	0	2	1	0	0	0	0	0	1	0	0	0	0	0	0	0	0	0	1.689	86.8	30.4271	0	0	0
0	22.7379	0	11	5	1	8	3	9	7	2	6	8	4	5	6	6	1	3	1	1	0	0	3	1	0	0	0	0	0	0	0	0	0	0	0	0	0	0	0	0	0	0	0	1.562	51.3	21.0259	0	570	570
0	22.6858	0	9	6	1	9	3	8	5	7	4	2	2	6	2	2	9	0	0	3	0	0	1	0	0	0	2	0	1	0	3	0	0	0	3	3	0	3	0	0	0	3	0	1.65	56.9	20.8999	0	2640	2640
0	22.8857	0	10	4	9	9	3	9	7	1	5	1	5	4	2	3	1	0	0	0	0	0	0	0	0	0	0	0	0	0	1	0	0	0	0	0	0	0	0	0	0	0	0	1.562	68.4	28.0346	900	320	1220
0	23.0062	0	6	3	9	1	9	1	8	1	1	9	9	3	3	3	1	2	0	2	2	0	3	0	0	0	3	3	3	0	0	0	0	0	0	3	0	3	3	0	0	0	0	1.668	100.4	36.0862	0	3540	3540
0	22.2094	0	12	4	9	9	3	9	8	1	4	9	7	4	4	4	1	1	0	0	0	0	0	0	0	0	0	1	1	0	0	0	0	0	0	0	0	0	0	0	0	1	0	1.627	85.2	32.1858	0	100	100
0	22.1328	0	10	4	9	9	4	9	5	1	4	1	3	5	5	3	1	0	0	1	2	0	0	0	3	0	0	0	0	3	0	0	0	0	0	2	3	0	0	0	0	3	0	1.591	42.9	16.9479	0	450	450
0	22.8857	0	12	4	8	1	5	8	6	1	5	9	2	4	4	4	1	3	0	0	0	0	3	0	0	0	0	0	0	3	0	0	0	0	0	0	0	0	0	0	0	0	0	1.501	44.9	19.929	0	50	50
0	22.8912	0	8	3	9	9	3	2	4	1	3	1	4	5	4	4	1	3	3	0	0	0	0	0	0	0	0	0	0	0	0	0	0	0	0	0	0	0	0	0	0	0	0	1.563	49.7	20.3441	0	1410	1410
0	22.2012	0	7	3	9	8	4	1	9	1	5	1	3	4	4	4	9	1	0	2	1	0	3	0	0	0	0	0	0	0	0	0	0	0	0	0	0	0	0	0	0	2	0	1.577	54.7	21.995	0	100	100
0	22.1903	0	9	4	1	8	5	1	4	1	4	7	4	4	1	4	9	2	0	0	0	0	0	0	0	0	0	0	0	0	0	0	0	0	0	0	0	0	0	0	0	0	0	1.517	62.6	27.2021	0	210	210
0	22.9377	0	9	3	8	8	9	1	7	1	3	1	5	3	3	3	9	1	0	0	0	0	1	1	0	0	0	1	2	0	0	0	0	0	0	0	0	0	0	1	0	2	0	1.558	60.7	25.0065	0	30	30
0	22.9459	0	9	4	9	7	1	3	4	2	4	9	4	4	4	4	1	0	0	3	0	0	0	0	0	0	0	0	0	0	0	0	0	0	0	1	0	0	0	0	0	0	0	1.599	48.8	19.0864	0	660	660
0	23.2745	0	7	3	8	8	3	8	8	1	3	8	3	3	3	3	1	0	0	2	0	0	0	0	0	0	0	0	0	0	0	0	0	0	0	0	0	0	0	0	0	3	0	1.646	55.4	20.448	0	120	120
0	22.1437	0	10	4	1	9	4	1	4	1	4	9	7	4	9	4	9	1	0	1	3	0	1	0	0	0	0	1	1	0	1	0	0	0	0	0	0	0	0	0	0	0	0	1.655	78.3	28.5868	0	840	840
0	22.8693	0	8	4	9	9	5	1	9	1	5	1	5	4	5	5	9	3	1	0	0	0	0	0	0	0	0	0	1	0	0	2	0	0	0	2	0	0	0	0	0	0	0	1.57	64.4	26.1268	0	820	820
0	22.486	0	7	4	9	8	4	1	4	1	4	1	4	4	4	4	1	3	3	0	0	0	3	0	0	0	0	0	0	0	0	0	0	0	0	0	0	0	0	0	0	0	0	1.661	63.5	23.0162	0	80	80
0	22.0561	0	5	3	8	2	3	1	9	1	5	2	3	2	2	2	1	0	0	3	2	0	0	0	0	0	0	0	0	0	0	0	0	0	0	3	3	0	0	0	0	0	0	1.588	51.5	20.4224	60	320	380
0	22.4066	0	12	3	9	8	5	7	8	1	3	9	6	3	2	2	9	0	0	0	1	1	0	0	0	0	0	0	0	0	0	0	0	0	0	0	0	0	0	1	0	3	0	1.552	71.2	29.5595	0	40	40
0	22.3847	0	8	3	9	1	5	1	4	1	2	8	4	3	3	3	1	1	2	0	0	3	1	2	0	0	0	0	0	0	0	0	0	0	0	0	0	0	0	0	0	0	0	1.513	65.8	28.7441	0	90	90
0	22.3984	0	4	5	1	7	6	2	8	1	4	9	5	5	1	5	9	0	0	3	2	0	0	0	0	0	2	0	0	0	0	0	0	0	0	3	0	3	0	0	0	3	0	1.5	52.6	23.3778	0	40	40
0	22.0862	0	12	3	1	9	3	9	9	1	2	9	2	2	2	2	1	0	0	1	0	0	0	0	0	0	0	0	0	0	0	0	0	0	0	1	0	0	0	0	0	2	0	1.624	52.2	19.7924	0	90	90
0	23.05	0	10	3	9	8	3	9	3	9	3	9	3	3	3	3	1	1	0	0	0	0	3	0	0	0	0	0	0	0	0	0	0	0	0	3	0	0	0	0	0	0	3	1.561	45.1	18.5085	0	90	90
0	22.4531	0	12	3	1	9	5	8	4	1	3	9	3	3	2	3	1	1	0	1	1	0	0	0	0	0	0	0	1	0	0	0	0	0	0	0	0	0	0	0	0	3	0	1.597	48.2	18.8989	0	600	600
0	22.0315	0	8	3	9	1	5	1	4	1	5	8	2	3	5	2	1	3	2	0	0	2	2	2	3	0	0	1	3	0	0	0	0	1	0	1	0	0	0	0	2	0	0	1.587	45.8	18.1849	0	900	900
0	22.8282	0	8	4	1	9	4	9	5	1	4	9	4	4	4	4	9	0	0	3	0	0	0	0	0	0	0	0	0	0	3	0	0	0	0	0	0	0	0	0	0	0	0	1.65	71.8	26.3728	0	1000	1000
0	23.4661	0	8	4	9	1	4	8	4	1	6	9	5	4	3	1	1	1	0	0	0	2	3	0	0	0	0	0	0	0	0	2	0	0	0	3	0	0	0	0	0	0	0	1.652	68.1	24.9532	0	60	60
0	22.5161	0	10	3	9	8	2	9	4	1	3	9	5	3	4	4	1	2	0	0	0	0	0	0	0	0	0	0	1	0	1	0	0	0	0	2	0	0	0	0	0	0	0	1.63	63.8	24.0129	0	140	140
0	23.4552	0	2	4	9	1	3	2	5	1	4	9	4	5	4	4	1	3	0	3	1	0	0	0	3	0	0	0	0	2	0	0	0	0	0	3	2	3	0	0	0	0	0	1.64	48.3	17.9581	0	300	300
0	23.3703	0	9	4	8	7	8	1	9	1	3	9	3	3	3	3	1	3	0	0	1	0	3	0	0	0	0	0	0	0	0	3	0	0	0	0	0	0	1	0	0	0	0	1.698	63.4	21.9894	0	560	560
0	22.9733	0	7	5	1	8	5	9	5	1	5	8	4	5	5	4	1	3	1	0	0	0	0	0	0	0	0	0	0	0	0	0	0	0	0	0	0	0	0	0	0	0	0	1.59	53.4	21.1226	0	120	120
0	22.2478	0	11	2	1	9	3	1	5	1	9	8	2	2	5	3	1	3	1	0	0	1	1	0	2	0	0	0	0	1	0	1	1	0	0	1	0	0	0	0	0	0	0	1.605	48.5	18.8275	900	920	1820
0	22.3463	0	9	5	9	9	6	7	9	2	4	9	5	5	5	5	1	3	0	0	0	0	0	0	0	0	0	0	0	0	0	0	0	0	0	0	0	0	0	0	0	3	0	1.521	59.3	25.6328	0	100	100
0	22.2587	0	11	5	1	9	4	8	4	9	4	9	5	3	7	3	9	2	0	2	0	0	2	0	0	0	0	0	3	0	2	0	0	0	0	0	0	0	2	0	0	2	0	1.61	70.7	27.2752	360	200	560
0	22.4668	0	6	5	8	9	3	9	9	2	1	7	7	4	6	5	1	0	0	0	0	0	0	0	0	0	0	0	0	0	0	0	0	0	0	0	0	0	0	0	0	3	0	1.708	96.8	33.1818	0	0	0
0	23.4606	0	8	4	1	8	3	9	7	1	3	9	2	4	4	4	1	1	0	0	0	0	0	1	2	0	0	0	0	0	0	0	0	0	0	3	0	0	0	0	0	0	0	1.651	49.6	18.1965	0	1560	1560
0	23.2005	0	8	6	1	9	7	1	5	1	9	1	5	5	6	4	1	0	0	1	2	0	0	0	0	0	0	0	0	0	0	0	1	0	0	3	0	0	0	0	0	0	0	1.637	62.7	23.3975	0	1065	1065
0	23.165	0	11	3	1	9	6	1	7	9	5	9	5	5	5	5	1	0	0	0	1	0	0	0	0	0	0	0	0	0	0	1	0	0	0	2	0	0	0	0	0	0	0	1.548	58.6	24.4543	0	0	0
0	23.1786	0	11	5	1	9	5	9	5	1	5	9	5	4	5	4	1	0	0	0	0	0	3	0	0	0	0	0	3	0	0	0	0	0	0	3	0	3	0	0	0	0	0	1.636	76	28.3953	0	120	120
0	22.2396	0	5	3	8	2	3	7	7	2	3	9	2	3	3	2	9	0	0	3	3	0	0	2	0	0	0	0	0	1	1	1	1	0	0	0	0	3	0	0	0	3	0	1.505	39.6	17.4833	0	180	180
0	22.4723	0	7	3	1	5	3	9	6	1	5	8	3	3	5	3		3	0	0	0	1	3	0	1	0	0	0	1	0	0	3	0	0	0	1	1	0	0	2	0	0	0	1.574	49.2	19.8589	0	200	200
0	23.2361	0	10	4	9	9	4	1	9	1	4	9	5	4	4	4	1	3	3	0	0	0	3	3	0	0	0	3	3	0	3	3	0	0	0	3	3	0	0	3	3	0	0	1.666	69.7	25.1121	0	100	100
0	22.8665	0	10	3	8	1	4	9	5	1	4	1	4	3	3	3	1	3	3	0	0	3	2	3	0	2	3	0	0	0	0	0	0	0	0	0	3	0	0	0	0	0	0	1.59	66.2	26.1857	0	180	180
0	22.9268	0	9	3	9	8	4	1	3	1	7	8	5	3	3	3	1	3	2	0	0	2	3	0	0	0	0	2	0	0	3	2	0	0	0	3	0	0	0	2	3	0	0	1.644	82.9	30.6726	0	270	270
0	23.3895	0	6	3	9	8	4	6	7	1	8	2	2	3	3	9	9	3	0	0	0	0	2	0	3	0	0	0	0	0	0	0	0	0	0	2	0	0	0	0	0	0	0	1.538	45.7	19.3198	0	450	450
0	22.1574	0	7	4	1	7	4	1	9	2	4	7	4	4	4	6	1	0	0	0	0	1	0	0	3	0	0	3	0	3	0	3	0	0	0	3	3	0	0	0	0	0	0	1.56	54.6	22.4359	0	180	180
0	22.8802	0	9	4	9	8	2	1	3	1	4	9	4	5	3	3	1	0	0	0	0	0	3	1	3	0	0	0	0	3	0	0	0	0	0	0	0	0	0	0	3	0	0	1.529	49.4	21.1306	0	420	420
0	23.0308	0	12	5	9	1	3	9	6	1	3	9	5	3	7	4	9	3	2	0	2	0	0	1	3	0	3	0	2	1	3	2	0	0	0	2	0	0	0	0	0	2	0	1.653	60.6	22.1782	0	285	285
0	22.7214	0	5	6	9	3	4	2	7	1	5	3	3	6	7	3	1	0	0	0	1	0	0	0	0	0	0	0	0	0	0	0	0	0	0	0	0	0	0	0	0	0	0	1.558	41.3	17.0143	0	210	210
0	22.8063	0	11	3	9	6	3	9	3	1	3	9	3	3	4	3	1	3	0	0	0	0	0	0	0	0	0	1	1	2	3	3	1	0	0	0	0	3	0	0	0	0	0	1.566	57.1	23.2837	0	20	20
0	22.2313	0	5	5	1	4	5	1	5	1	5	1	4	5	5	5	1	2	0	0	0	0	0	1	0	0	0	0	0	0	0	0	0	0	0	0	0	0	0	0	0	0	0	1.655	61.9	22.5993	0	105	105
0	22.2231	0	5	3	9	1	3	1	3	2	3	9	3	4	4	4	1	3	0	0	0	0	3	0	0	0	0	0	0	3	0	3	0	0	0	1	3	0	0	0	0	3	0	1.584	49.4	19.6887	0	360	360
0	23.3566	0	7	6	9	1	5	9	7	1	4	2	2	7	7	6	9	3	0	0	3	0	3	0	1	0	0	0	0	1	0	0	1	0	0	1	1	0	0	0	0	1	0	1.592	45.2	17.8341	0	210	210
0	22.3244	0	10	5	1	9	7	9	6	1	9	1	4	4	4	3	1	0	0	0	0	0	1	0	0	0	0	0	0	0	0	0	0	0	0	2	0	0	0	0	0	0	0	1.689	63.4	22.2244	0	600	600
0	23.5017	0	6	4	9	9	2	9	4	1	2	9	5	4	2	3	1	3	0	0	1	0	0	0	0	0	0	0	0	0	0	0	0	0	0	0	0	0	0	0	0	0	0	1.608	83.6	32.3321	0	5100	5100
0	22.0808	0	8	4	1	8	4	8	5	1	3	9	6	4	4	4	1	3	0	0	0	0	0	0	0	0	0	0	0	0	0	1	0	0	0	1	0	0	0	0	0	0	0	1.543	68.2	28.6452	0	3600	3600
0	23.0116		13	4	9	6	4	9	5	1	4	1						0	0	0	0	0	3	0	0	0	0	0	0	0	0	0	0	0	0	3	0	0	0	0	0	1	0	1.678	54.1	19.2138	360	315	675
0	22.9158	0	11	3	9	9	4	9	3	1	4	9	3	3	4	3	1	2	0	0	0	0	0	0	0	0	0	0	0	0	0	1	1	1	0	0	0	0	0	1	0	0	0	1.63	71.8	27.024	0	240	240
0	22.256	0	11	3	9	9	3	9	3	9	1	9	4	1	3		1	3	1	0	0	2	0	0	0	0	0	3	0	0	2	0	0	0	3	2	0	0	0	3	0	1	2	1.539	61.6	26.0078	0	0	0
0	22.2122	0	13	4	8	8	5	1	6	1	8	1	5	5	6	5	9	2	0	0	0	0	3	0	0	0	0	0	0	0	0	3	0	0	0	3	0	3	0	0	0	0	0	1.634	56.1	21.0116	0	210	210
0	23.0965	0	6	4	9	8	3	9	6	1	6	9	6	4	3	3	1	3	1	0	0	0	0	0	0	0	0	0	1	0	3	0	0	0	0	0	0	0	0	3	0	1	0	1.569	89.7	36.4373	480	360	840
0	23.1841	0	8	4	9	8	4	1	1	9	1	9	4	2	4	4	1	3	2	1	0	3	3	2	0	0	0	0	3	1	3	1	0	0	0	1	0	0	0	1	1	0	0	1.533	59.7	25.4033	0	420	420
0	22.7379	0	10	3	9	8	5	9	3	8	5	1	6	3	3	3	1	3	1	0	0	3	3	0	0	0	0	0	0	0	0	0	0	0	0	0	0	0	0	0	2	0	0	1.628	77.5	29.241	0	2190	2190
0	22.935	0	5	4	8	9	3	5	6	1	2	6	4	4	5	5	1	0	0	0	1	2	1	0	3	0	0	0	0	0	0	3	0	0	0	3	3	0	0	0	0	0	0	1.472	53.6	24.7371	0	1110	1110
0	22.1218	0	8	4	1	9	4	9	6	1	4	9	3	4	4	4	9	0	1	0	0	0	1	0	3	0	0	0	0	0	0	3	0	0	0	2	2	0	0	0	0	0	0	1.593	63.3	24.9443	240	960	1200
0	23.0527	0	10	3	9	6	4	1	3	2	3	8	3	3	3	3	1	0	0	3	2	0	0	0	0	0	0	0	0	0	0	1	0	0	0	0	0	0	0	0	0	2	0	1.521	57	24.6386	0	280	280
0	22.9377	0	11	2	8	1	2	9	2	7	8	1	5	2	5	2	9	3	2	1	0	1	0	3	1	0	0	0	0	0	0	3	0	3	0	3	0	0	0	3	3	0	0	1.644	72.3	26.7507	0	1530	1530
0	23.3676	0	7	4	1	6	5	1	8	1	3	1	5	4	5	5	9	3	0	0	0	0	0	0	0	0	0	0	0	0	0	0	0	0	0	0	0	0	0	0	0	0	0	1.559	71.8	29.5415	0	2700	2700
0	23.2909	0	12	4	9	9	4	1	5	2	4	9	4	4	4	4	1	3	0	0	0	0	3	0	0	0	0	0	0	0	0	0	0	0	0	0	0	0	0	0	0	0	0	1.656	53.6	19.5454	0	180	180
0	23.0089	0	5	4	9	1	2	7	9	1	6	9	4	3	4	3	1	3	2	0	0	0	0	0	0	0	0	0	0	0	0	2	2	0	0	3	1	0	1	0	1	0	0	1.599	55.8	21.8241	0	630	630
0	22.9487	0	9	5	9	9	3	9	1	2	1	9	7	6	3	3	1	3	1	1	0	0	0	0	0	0	0	0	0	0	0	0	0	0	0	3	0	0	0	0	0	3	0	1.599	92.7	36.2562	0	1680	1680
0	23.1321	0	10	3	9	8	5	1	6	9	3	9	5	3	5	5	9	1	0	0	0	0	0	0	0	0	0	0	0	0	0	0	0	0	0	0	0	0	0	0	0	0	0	1.517	55	23.8996	0	525	525
0	23.1047	0	12	4	1	8	9	1	6	1	9	1	3	5	3	3	9	2	0	2	2	2	0	1	0	0	0	0	0	0	0	0	2	0	0	0	0	1	0	0	0	0	0	1.536	46.1	19.5397	252	400	652
0	23.1184	0	11	4	1	8	5	9	4	1	4	8						2	0	0	0	0	1	0	0	0	0	0	0	0	0	0	0	0	0	3	0	0	0	0	0	3	0	1.581	55.6	22.2439	0	795	795
0	23.3073	0	11	3	8	9	5	1	9	6	4	1	4	3	3	3	1	0	0	0	0	0	0	0	0	0	0	0	0	0	0	2	0	0	0	0	0	0	0	0	0	0	0	1.592	55.9	22.0559	0	60	60
0	23.5209	0	8	5	9	9	6	1	5	1	5	9	5	4	5	4	9	0	0	0	0	0	1	0	0	0	0	0	0	0	0	0	0	0	0	0	0	0	0	0	0	0	0	1.576	71	28.5855	0	220	220
0	22.1164	0	12	6	8	8	2	8	9	1	4	8	6	6	4	4	1	0	0	0	0	0	0	0	0	0	0	0	0	0	0	0	0	0	0	2	0	0	0	0	0	1	0	1.581	67.9	27.1648	0	225	225
0	22.9979	0	3	4	9	5	6	7	8	1	2	9	4	7	6	2	1	2	3	0	1	0	0	1	0	0	1	2	3	0	2	3	0	0	3	3	2	0	1	0	3	0	0	1.664	54.3	19.6107	0	1400	1400
0	22.9651	0	11	4	9	9	4	9	9	1	5	9	9	4	4	4	9	3	0	1	1	0	0	0	0	0	0	1	1	0	0	3	0	0	3	0	0	1	0	0	0	3	0	1.569	74.2	30.141	0	510	510
0	22.2505	0	7	4	8	8	4	8	8	1	4	8	2	4	4	2	1	0	0	1	0	0	0	0	0	0	0	0	0	2	0	0	2	0	0	1	1	1	0	0	0	2	0	1.674	47.3	16.8791	0	1620	1620
0	22.2697	0	10	3	9	9	1	9	4	2	1	9	3	3	3	3	1	0	0	0	0	0	0	0	0	0	0	0	0	0	0	0	0	0	0	0	0	0	0	0	0	3	0	1.496	56.2	25.1115	0	840	840
0	22.9049	0	8	5	9	1	5	1	6	9	4	1	7	4	4	4	9	3	0	0	0	0	0	0	0	0	0	1	1	0	1	0	0	0	0	0	0	0	0	0	0	0	0	1.556	78.3	32.3402	0	270	270
0	22.2122	0	7	3	8	9	2	9	2	1	2	9	6	2	3	3	1	3	0	0	0	0	3	0	0	0	0	0	0	0	0	0	0	0	0	3	0	0	0	0	0	0	0	1.625	77.8	29.4627	0	160	160
0	23.2444	0	11	4	9	8	6	1	4	2	4	9	4	4	4	3	1	0	0	0	0	0	0	0	0	0	0	0	0	0	0	0	0	0	0	1	0	0	0	0	0	0	0	1.698	76.1	26.3942	240	50	290
0	23.3621	0	10	4	9	8	4	1	5	1	4	9	5	5	3	3	9	0	0	0	0	0	0	0	1	0	0	0	0	0	0	0	0	0	0	0	0	0	0	0	0	3	0	1.472	61.8	28.5215	0	0	0
0	23.1129	0	8	3	9	9	3	9	3	9	4	8	3	5	5	4	1	0	0	0	0	3	0	0	1	0	0	0	0	0	0	3	0	0	0	3	0	0	0	0	0	3	0	1.596	53.6	21.0426	0	2500	2500
0	23.321	0	7	3	9	5	7	1	4	9	3	6	2	4	5	9	1	2	3	3	0	0	3	3	0	0	0	0	0	3	0	0	0	0	0	3	0	0	0	0	0	0	0	1.485	43.8	19.8619	0	610	610
0	22.2615	0	11	4	9	1	3	9	4	1	4	9	3	3	3	1	1	3	0	3	0	0	0	0	0	0	0	0	0	0	3	0	0	0	0	3	0	0	0	0	0	0	0	1.586	64.5	25.6421	0	2775	2775
0	23.2772	0	11	4	1	9	4	9	4	1	4	9	5	4	5	5	1	3	0	0	0	0	0	0	0	0	0	3	1	0	0	0	0	0	0	0	0	0	0	1	0	3	0	1.648	71.5	26.3264	240	210	450
0	22.9432	0	3	3	1	9	4	8	5	1	4	1	2	4	8	4	1	2	0	3	0	1	0	0	0	0	0	0	0	3	1	0	1	0	0	1	3	1	0	0	0	0	0	1.576	48.1	19.3657	0	780	780
0	23.3073	0	12	4	9	2	4	9	7	1	3	9	7	3	2	4	1	3	0	1	0	0	3	0	0	0	0	0	3	0	0	0	0	3	0	0	0	1	0	3	0	0	0	1.651	70.6	25.9006	120	0	120
0	22.245	0	9	1	9	9	6	9	9	1	6	1	9	1	9	9	1	3	0	1	1	0	0	0	0	0	3	3	3	0	3	0	0	0	3	3	0	3	3	3	3	3	0	1.599	81.8	31.9931	0	210	210
0	22.3573	0	4	5	1	8	5	1	8	1	7	1	4	4	5	4	1	0	0	0	0	0	0	0	0	0	0	0	0	0	0	0	0	0	1	2	0	0	0	0	0	0	0	1.628	55.7	21.0158	0	945	945
0	22.4449	0	12	4	9	8	3	1	5	1	5	9	5	3	5	5	1	3	0	0	0	0	0	0	0	0	0	0	0	0	0	0	0	0	3	0	0	0	0	0	0	0	0	1.543	60.1	25.2431	0	120	120
0	22.308	0	11	4	1	2	8	1	9	1	9	1	4	4	4	4	9	3	0	0	0	1	1	0	0	0	0	0	1	0	0	1	0	0	0	2	0	0	0	0	0	0	0	1.595	65	25.5501	0	450	450
0	22.8939		7	2	9	7	3	1	5	1	3	9	4	2	2	2	1	3	2	0	0	1	2	2	0	0	1	3	3	0	0	2	2	2	0	2	0	2	2	3	3	0	0	1.61	55.6	21.4498	0	1620	1620
0	22.4148	0	10	5	1	9	5	9	6	1	5	1	6	5	5	5	1	3	1	0	0	1	1	1	0	0	3	2	1	0	0	0	0	0	0	3	0	2	2	2	1	0	0	1.54	65.2	27.492	0	2560	2560
0	22.3025	0	12	4	9	8	4	9	6	1	2	9	4	3	2	3	1	0	0	0	0	0	1	1	0	0	0	0	0	0	0	0	0	0	0	1	0	0	0	0	0	0	0	1.75	82.8	27.0367	0	350	350
0	23.2663	0	11	3	1	9	7	2	8	1	3	2	3	4	4	3	1	3	3	2	0	0	2	0	3	3	2	3	0	0	3	3	3	3	0	3	3	3	3	0	3	3	3	1.578	51.6	20.7222	0	1050	1050
0	22.9432	0	9	5	9	1	3	1	6	1	4	9	3	3	3	3	9	0	0	1	2	0	0	0	0	0	0	0	0	0	0	2	0	0	0	2	0	1	0	0	0	3	0	1.563	44.5	18.2155	0	315	315
0	22.0945	0	5	4	9	1	3	2	5	1	4	9	6	4	6	6	1	0	0	1	1	0	3	0	0	0	0	0	0	0	0	0	0	0	0	0	0	0	0	0	0	0	0	1.501	52	23.0803	0	60	60
0	22.601	0	5	4	8	5	9	1	5	1	6	1	6	4	5	4	1	3	3	1	0	1	0	1	2	0	0	1	2	0	1	0	0	0	3	0	0	2	0	0	2	0	0	1.52	64.8	28.0471	0	3510	3510
0	22.7762	0	5	2	1	9	3	8	3	1	3	9	3	3	2	1	1	0	0	0	0	0	0	0	0	0	0	0	0	0	0	0	0	0	0	0	0	0	0	0	0	0	0	1.629	52	19.5957	0	1140	1140
0	22.3901	0	10	4	9	8	5	2	5	1	8	9	4	7	4	4	9	0	0	0	0	0	0	0	1	0	0	0	0	2	0	0	0	0	0	0	0	0	0	0	0	0	0	1.531	52	22.1847	0	3120	3120
0	22.3792	0	6	6	9	9	5	9	5	1	4	9	9	5	3	3	9	1	3	3	0	0	3	0	0	0	0	0	0	0	0	0	0	0	0	0	0	0	0	0	0	0	0	1.585	93.7	37.2976	0	560	560
0	22.2779	0	9	4	9	9	4	8	3	9	3	9	4	4	2	2	1	3	1	0	1	3	3	3	3	0	0	1	0	0	0	3	0	0	0	3	0	3	0	0	0	3	0	1.609	65.2	25.1846	0	0	0
0	22.7844	0	10	4	1	9	5	9	4	1	5	9	5	4	6	3	1	2	1	0	0	0	0	0	0	0	0	3	3	0	0	3	0	0	0	0	0	0	0	0	0	0	0	1.551	52	21.6162	0	900	900
0	22.3491	0	13	5	8	8	3	8	8	1	5	8	5	5	3	5	9	0	0	0	0	0	0	0	0	0	0	0	2	0	0	0	0	0	0	0	0	0	0	0	0	3	0	1.617	120	45.8946	0	0	0
0	22.371	0	6	4	9	9	2	9	8	1	3	9	6	4	4	6	1	1	0	0	0	0	1	0	0	0	0	0	2	0	1	0	0	0	0	0	0	0	0	1	0	0	0	1.645	95	35.1068	0	210	210
0	22.4093	0	7	3	9	8	4	1	3	1	4	8	4	4	3	4	1	0	1	2	0	0	0	0	0	0	0	0	0	0	0	0	0	0	0	0	0	0	0	0	0	0	0	1.5	56.9	25.2889	0	630	630
0	23.4086	0	9	3	8	9	4	7	5	1	3	9	3	3	1	2	1	3	2	0	0	0	0	0	2	0	0	0	0	0	0	0	0	0	0	0	0	0	0	0	0	0	0	1.631	49.5	18.6079	0	210	210
0	23.0801	0	8	2	9	5	4	1	7	2	8	7	2	4	6	5	1	0	0	0	0	0	0	0	0	0	0	0	0	0	0	0	0	0	0	0	0	0	0	0	0	0	0	1.723	60.1	20.2444	0	210	210
0	23.2745	0	10	4	9	9	3	8	5	1	4	1	4	4	5	1	9	0	3	0	0	1	0	0	0	0	0	0	1	0	0	3	0	0	0	3	0	0	0	0	0	0	0	1.729	60.8	20.3383	0	3440	3440
0	22.4641	0	11	6	9	7	4	9	9	1	6	9	8	5	5	8	9	3	1	1	0	0	3	1	0	0	3	0	3	0	1	1	0	2	0	3	0	0	0	3	0	0	0	1.567	95.4	38.8517	0	40	40
0	23.3183	0	7	3	9	6	1	7	9	1	3	9	5	3	3	3	1	3	0	0	0	0	3	0	0	0	0	0	0	0	0	0	3	0	0	0	0	0	0	0	0	0	0	1.586	80.1	31.8439	0	0	0
0	22.3984	0	11	4	9	9	5	8	5	8	5	1	3	3	3	4	1	2	0	0	0	0	0	0	0	0	0	0	0	0	0	0	0	0	0	1	0	0	0	0	0	0	0	1.617	60.4	23.1003	0	540	540
0	22.3792	0	7	4	1	9	7	2	4	1	5	9	4	6	3	3	1	0	0	0	0	0	0	0	0	0	0	0	0	0	0	0	0	0	0	0	0	0	0	0	0	0	0	1.643	54.5	20.1893	0	360	360
0	22.3874	0	4	2	9	1	2	9	4	1	2	9	2	2	2	2	1	3	3	0	0	0	0	0	0	0	0	0	0	0	0	0	0	0	0	1	0	0	0	0	0	0	0	1.629	49.5	18.6536	0	360	360
0	22.3326	0	6	3	8	8	3	9	3	1	3	9	4	3	3	3	1	3	0	0	0	0	1	0	0	0	0	3	0	0	3	0	0	0	0	3	0	0	0	2	0	0	0	1.67	75.4	27.0357	0	120	120
0	22.3929	0	3	4	9	1	5	1	9	1	9	1	4	5	5	4	9	0	0	0	1	0	0	0	0	0	0	0	0	0	1	1	0	0	0	1	0	0	0	0	0	0	0	1.511	58	25.4038	0	960	960
0	22.4148	0	10	3	9	7	4	1	5	1	8	1	4	5	4	4	9	0	0	0	0	0	0	0	0	0	0	0	0	0	0	0	0	0	0	0	0	0	0	0	0	3	0	1.64	62	23.0518	0	90	90
0	22.9268	0	11	5	9	9	4	9	6	9	9	2	9	9	5	5	1	0	0	0	0	0	0	0	0	0	0	0	0	0	0	0	0	0	0	1	0	0	0	0	0	1	0	1.614	129	49.5202	0	360	360
0	22.3436		8	3	9	1	5	1	9	1	4	7						3	0	0	3	0	3	3	3	0	0	3	3	3	3	3	3	3	3	3	3	0	0	3	0	3	0	1.742	64.7	21.321	0	360	360
0	22.9569	0	9	3	9	9	4	1	9	1	3	9	1	3	3	3	1	3	0	3	0	0	3	0	0	0	0	0	0	1	2	0	0	0	1	0	0	1	0	0	0	2	0	1.683	43.3	15.2869	0	420	420
0	23.4743	0	10	4	9	8	4	9	4	1	3	9	2	3	5	4	9	0	0	0	0	0	0	0	0	0	0	0	0	0	1	3	0	0	0	3	0	0	0	0	0	0	0	1.523	50.8	21.901	0	885	885
0	23.3046	0	12	4	9	7	3	9	2	9	5	9	5	4	2	5	9	0	1	1	0	0	0	0	0	0	0	0	0	0	0	3	0	0	0	0	0	0	0	0	0	3	0	1.571	79	32.0092	0	1230	1230
0	22.7351	0	9	2	9	8	1	9	2	1	7	9	3	2	2	2	1	3	0	0	0	0	0	0	0	0	0	0	0	0	0	0	0	0	0	0	0	0	0	0	0	0	0	1.664	65.7	23.7279	0	90	90
0	22.3874	0	9	3	9	7	3	9	9	1	3	9	3	3	4	3	1	3	1	0	0	0	1	0	0	0	0	0	0	0	3	0	0	0	0	3	0	0	0	0	0	0	0	1.642	56.2	20.8444	270	0	270
0	22.4175	0	5	3	2	8	3	2	3	2	3	8	3	3	3	3	9	0	0	3	0	0	0	0	0	0	1	0	0	0	2	0	3	0	0	0	0	0	1	0	0	0	0	1.618	69.6	26.586	0	3810	3810
0	22.3491	0	11	5	7	8	4	1	9	2	4	8	6	4	5	5	9	1	0	0	0	0	0	0	0	0	0	0	0	0	0	0	0	0	0	1	0	0	0	0	0	1	0	1.574	74.3	29.9902	0	1710	1710
0	23.2252	0	6	3	9	1	3	9	7	1	3	1	5	3	3	3	1	0	0	0	0	0	0	0	0	0	0	0	0	0	0	0	0	0	0	1	0	0	0	0	0	0	0	1.66	80	29.0318	0	280	280
0	23.321	0	9	3	9	9	3	9	3	1	3	9	4	3	4	2	1	3	2	0	0	1	2	0	1	1	3	3	3	0	0	1	1	0	1	1	1	1	1	0	1	0	1	1.619	62.1	23.6918	0	250	250
0	22.8474	0	10	5	1	8	4	3	7	1	9	2	4	6	8	7	9	0	0	0	0	0	0	0	0	0	0	0	0	0	1	3	0	0	0	0	0	0	0	0	0	0	0	1.494	44.8	20.0714	120	1260	1380
0	22.3244	0	8	4	1	9	4	1	9	1	4	1	3	4	4	4	9	3	0	0	0	0	0	0	0	0	0	0	0	0	0	0	0	0	0	0	0	0	0	0	0	0	0	1.628	55.3	20.8649	0	90	90
0	22.4367	0	7	4	1	9	3	1	4	9	3	1	4	3	3	3	1	2	0	0	0	0	0	0	0	0	0	0	0	0	0	1	0	0	0	1	0	0	0	0	0	1	0	1.681	67.2	23.7812	0	330	330
0	22.5654	0	8	5	1	9	7	2	6	1	4	3	4	4	4	4	9	0	0	0	0	0	0	0	0	0	0	0	0	0	0	0	0	0	0	2	0	0	0	0	0	3	0	1.557	52.8	21.7799	0	120	120
0	23.3155	0	10	4	1	9	5	9	8	1	4	8	3	4	4	4	1	3	1	0	0	0	3	3	0	0	0	0	0	3	0	0	0	0	0	3	0	0	0	0	0	3	0	1.656	53.4	19.4725	0	150	150
0	22.7762	0	7	4	9	8	3	9	8	1	4	8	7	4	6	3	1	3	0	0	0	0	3	0	0	0	0	3	3	0	0	0	0	0	0	3	0	0	0	0	3	0	0	1.609	89.4	34.5323	0	300	300
0	22.4203	0	6	4	1	9	5	2	9	1	5	9	4	4	4	4	1	0	0	0	0	0	1	0	0	0	0	0	0	0	1	0	0	0	0	0	0	0	0	0	0	0	0	1.676	66.6	23.7097	0	360	360
0	23.4059	0	8	5	8	9	5	9	9	1	5	9	4	4	4	4	1	3	1	0	0	0	0	0	0	0	0	0	0	0	0	0	0	0	0	0	0	0	0	0	0	1	0	1.559	60.4	24.851	0	860	860
0	23.102	0	11	3	9	1	2	9	2	1	2	9	8	2	6	6	9	3	1	1	1	0	0	0	0	0	0	2	3	0	1	0	0	0	0	0	0	0	0	2	0	0	0	1.593	108	42.5591	0	500	500
0	22.4312	0	11	5	9	2	4	1	6	9	4	9	6	5	6	6	1	3	0	0	1	3	3	3	0	0	0	0	2	0	0	3	0	1	1	1	0	0	3	3	0	0	0	1.604	79.6	30.9389	0	1560	1560
0	22.3765	0	8	3	9	9	1	9	5	1	4	1	5	4	4	4	1	3	0	3	3	0	0	0	0	0	3	0	0	0	0	0	3	0	0	0	0	3	3	0	0	3	0	1.6	73.6	28.75	0	0	0
0	23.7399	0	7	3	9	9	5	1	8	1	3	9	3	4	5	3	1	0	0	0	0	0	3	0	3	0	0	0	0	3	0	3	0	0	0	3	0	0	0	0	0	0	0	1.612	46.9	18.0486	60	245	305
0	22.8939	0	10	4	1	9	5	9	4	1	5	9	7	4	4	5	9	1	0	0	0	1	0	0	0	0	0	0	1	0	0	1	0	0	0	1	0	0	0	1	0	0	0	1.461	93.6	43.8506	360	1110	1470
0	22.9158	0	12	4	9	8	4	1	4	1	6	2	6	4	3	4	1	2	0	0	2	0	1	0	0	0	0	0	3	0	2	0	0	0	0	0	0	0	2	3	0	1	0	1.671	94.8	33.9512	0	610	610
0	22.4668	0	11	3	8	9	9	1	4	1	3	9	3	3	3	4	1	0	0	0	0	1	0	0	1	0	0	0	0	0	0	0	0	0	0	2	0	0	0	0	0	0	0	1.616	52.4	20.0654	0	100	100
0	22.7762	0	9	4	9	8	4	1	6	2	5	9	6	4	6	3	1	3	2	0	0	3	3	2	2	0	0	2	2	0	0	2	2	2	0	2	0	0	0	3	2	0	0	1.503	58.9	26.0734	0	180	180
0	22.5352	0	7	4	9	9	4	1	6	1	4	1	4	4	5	4	1	1	3	0	0	1	3	0	0	0	0	0	0	0	0	0	0	0	0	0	0	0	0	0	0	3	0	1.644	62.9	23.2727	0	900	900
0	22.9788	0	10	3	9	9	3	9	5	1	4	9	3	3	3	3	1	1	0	0	0	0	0	0	0	0	0	0	0	0	0	0	0	0	0	3	0	0	0	0	0	0	0	1.65	56.6	20.7897	0	140	140
0	21.9521	0	9	3	1	9	4	9	5	1	4	8	3	4	4	3	1	3	0	3	2	0	0	0	0	0	0	0	0	0	0	0	0	0	0	0	0	3	0	0	0	3	0	1.61	49.4	19.0579	0	1065	1065
0	22.8063	0	10	5	9	9	5	1	9	1	3	9	5	5	5	5	1	0	0	0	0	0	0	0	0	0	0	0	0	0	0	0	0	0	0	0	0	0	0	0	0	0	0	1.637	80.6	30.0772	0	1050	1050
0	23.269	0	9	5	1	9	8	9	4	1	9	1	4	4	4	4	1	1	1	0	0	0	0	0	0	0	0	0	0	0	2	0	0	0	0	0	0	0	0	0	0	3	0	1.604	71.6	27.8294	0	2850	2850
0	22.371	0	10	4	8	9	4	3	4	9	4	1	6	4	7	5	1	2	0	0	0	1	1	0	2	0	0	2	0	1	0	3	0	0	0	1	2	0	0	0	0	0	0	1.515	42.2	18.386	0	100	100
0	22.7296	0	11	4	2	9	4	7	6	7	4	8	4	4	4	4	1	1	0	0	0	0	0	0	0	0	0	0	0	0	0	0	0	0	0	0	0	0	0	0	0	0	0	1.557	56.8	23.4299	0	420	420
0	23.1513	0	10	5	9	9	5	9	7	1	4	1	7	5	7	5	1	0	0	0	0	0	0	1	0	0	0	0	0	0	0	0	2	0	0	2	0	0	3	0	0	0	0	1.559	85.2	35.0548	0	165	165
0	23.5483	0	10	4	1	9	4	9	5	1	4	9	4	5	4	4	9	0	0	1	1	0	0	0	0	0	0	0	0	0	3	1	0	0	0	0	0	0	0	0	0	3	0	1.623	54.6	20.7279	0	1000	1000
0	22.8474	0	5	4	8	9	2	1	9	1	8	3	4	6	9	3	9	3	0	0	1	0	0	0	3	0	0	0	0	3	0	0	0	0	0	3	3	0	0	0	0	0	0	1.764	70.2	22.56	0	300	300
0	22.5024	0	8	3	9	1	4	1	9	1	3	9	3	4	3	3	9	3	0	0	0	0	0	0	0	0	0	0	0	0	0	0	0	0	0	3	0	0	0	0	0	0	0	1.642	49.5	18.3594	0	105	105
0	23.2608	0	9	5	9	1	5	9	3	8	6	9	5	3	6	5	1	3	0	0	0	3	1	0	0	0	0	0	0	0	3	1	1	0	0	0	0	0	0	0	0	0	0	1.49	52.3	23.5575	600	210	810
0	23.2717	0	12	5	9	1	4	9	9	1	3	9	9	5	3	3		0	3	0	0	2	0	0	0	0	3	3	3	0	3	0	0	1	2	0	0	3	3	2	0	1	0	1.662	95.8	34.6819	0	390	390
0	22.5462	0	10	4	9	8	4	9	9	2	5	9	7	5	5	5	9	3	0	0	0	3	3	3	1	0	0	0	3	0	0	0	3	0	0	3	0	0	0	0	0	0	0	1.514	81.5	35.5554	0	280	280
0	22.4449	0	8	3	9	9	3	1	6	1	3	9	5	5	5	3	9	0	0	0	0	0	1	0	0	0	0	0	0	0	0	0	0	0	0	1	0	0	1	0	0	0	0	1.559	72.2	29.7061	360	975	1335
0	23.2635	0	11	3	9	9	7	1	9	1	4	9	6	4	4	4	1	2	0	1	1	0	3	0	0	0	0	0	1	0	0	0	0	0	0	0	0	0	0	0	0	0	0	1.562	69.3	28.4035	0	1380	1380
0	22.5133	0	9	3	9	8	2	1	3	1	2	9	4	3	2	2	9	3	1	2	2	0	0	0	1	0	3	1	3	0	3	1	0	0	2	2	0	3	3	2	0	0	2	1.643	76.9	28.4873	0	0	0
0	22.3819	0	8	3	9	7	2	1	6	1	8	9	1	3	5	5	1	0	0	0	2	0	1	0	0	0	0	0	0	1	0	0	0	0	0	1	0	3	0	0	0	1	0	1.645	48.6	17.9599	0	2220	2220
0	22.5024	0	12	3	9	1	6	9	5	1	3	9	4	3	4	4	1	3	0	0	0	0	1	0	0	0	0	0	0	0	3	3	0	0	0	0	0	0	0	0	0	0	0	1.546	55.5	23.2206	0	560	560
0	22.475	0	10	4	9	9	5	2	4	1	6	9	4	4	4	4	1	0	0	1	0	0	1	0	0	0	0	0	0	0	0	0	0	0	0	0	0	0	0	0	0	0	0	1.64	55.7	20.7094	0	30	30
0	22.8501	0	8	3	9	1	3	9	7	1	3	1	4	3	4	3	1	2	0	0	0	1	1	2	1	0	0	0	2	0	0	1	0	0	0	2	0	0	0	0	0	0	0	1.591	52.7	20.8195	0	100	100
0	22.9459	0	5	3	9	8	3	9	4	1	3	9	4	4	4	4	1	3	0	0	0	0	3	0	0	0	0	0	0	0	0	0	0	0	0	3	0	0	0	0	0	0	0	1.655	65.1	23.7676	0	2160	2160
0	22.4997	0	9	4	9	1	3	2	9	1	7	8	4	3	2	5	1	1	0	0	0	0	0	0	0	0	0	0	0	0	0	0	0	0	0	1	0	0	0	0	0	0	0	1.622	67.4	25.6188	0	540	540
0	22.6256	0	10	2	9	8	6	1	8	1	4	3	6	5	4	5	1	2	0	0	1	0	0	0	0	0	0	0	0	0	0	0	0	0	0	3	0	0	0	0	0	0	0	1.563	74.7	30.5775	0	4530	4530
0	22.7324	0	7	4	9	7	4	9	5	1	4	9	4	4	6	4	1	3	0	0	0	0	3	0	0	0	0	0	0	0	3	0	0	0	0	0	0	0	0	0	0	1	0	1.531	56.6	24.1472	0	210	210
0	23.3155	0	9	5	1	9	5	1	7	1	5	1	5	5	1	5	1	0	0	0	0	0	0	0	0	0	0	0	0	0	0	3	0	0	0	1	0	0	3	0	0	3	0	1.561	60	24.6233	0	1260	1260
0	23.1184	0	9	4	1	9	4	9	4	9	4	9	4	4	5	4	9	1	0	0	0	0	1	0	0	0	0	0	0	0	0	0	0	0	0	0	0	0	0	0	0	0	0	1.603	61.6	23.9725	0	480	480
0	22.486	0	8	4	9	1	5	9	4	1	3	1	8	4	8	8	9	0	0	0	0	0	0	1	0	0	0	0	0	0	0	0	0	0	0	2	0	0	0	0	0	0	0	1.698	123.7	42.9037	0	475	475
0	22.5024	0	9	4	9	1	4	6	5	2	8	9	4	5	1	6	1	1	0	3	0	0	1	0	0	0	0	0	0	2	0	3	0	0	0	0	0	1	0	0	0	0	0	1.616	51.7	19.7974	0	280	280
0	22.9569	0	10	4	8	9	3	9	5	1	4	9	6	4	4	3	1	0	0	0	0	0	0	0	0	0	0	0	0	0	0	0	0	0	0	1	0	0	0	0	0	0	0	1.577	77.2	31.0423	0	660	660
0	22.9952	0	8	3	8	1	4	8	3	2	4	1	3	3	3	3	9	1	0	0	1	0	0	0	0	0	0	0	0	0	0	0	0	0	0	0	0	0	0	0	0	0	0	1.612	51.7	19.8958	0	240	240
0	23.0418	0	4	3	9	8	3	7	7	2	3	8	4	3	3	3	1	3	0	0	0	0	0	0	2	0	0	3	0	0	0	0	0	0	0	0	0	0	0	0	0	1	0	1.549	53.4	22.2556	0	570	570
0	22.5982	0	9	4	1	7	3	9	6	2	9	1	5	4	6	5	9	0	0	0	0	0	1	0	0	0	0	0	0	0	0	0	0	0	0	0	0	0	0	0	0	1	0	1.462	64.3	30.0827	0	160	160
0	23.217	0	5	3	9	1	5	9	3	9	5	9	5	3	5	5	1	3	1	0	0	0	0	0	0	0	0	0	0	0	0	0	0	0	0	0	0	0	0	0	0	0	0	1.482	63.9	29.0941	0	60	60
0	22.5024	0	8	3	2	2	3	9	4	2	4	9	4	3	4	4	1	0	0	0	0	0	3	0	0	0	0	0	3	0	0	0	0	0	0	3	0	0	0	0	0	1	0	1.596	57	22.3774	0	220	220
0	22.5927	0	3	6	9	9	6	1	5	9	9	8	6	6	9	8	1	0	0	3	2	0	3	0	1	0	0	0	1	0	0	3	0	0	0	3	0	3	0	0	0	3	0	1.562	70.3	28.8133	0	290	290
0	22.486	0	11	3	9	8	3	6	4	1	6	2	3	4	5	3	1	0	0	0	0	0	1	0	0	0	0	0	0	0	0	0	1	3	3	0	0	0	0	0	0	0	0	1.56	51.8	21.2853	0	0	0
0	22.5216	0	10	3	9	9	3	9	3	9	1	9	7	3	3	3	1	3	2	3	0	1	0	0	0	0	3	1	3	0	0	0	0	0	0	0	0	1	0	1	0	0	1	1.588	88.7	35.1741	0	435	435
0	22.705	0	9	3	7	2	3	1	9	2	5	1	3	3	3	3	1	3	0	2	0	0	3	0	3	0	0	0	3	0	0	0	0	0	0	3	0	0	0	0	0	0	0	1.631	60.1	22.5926	0	2130	2130
0	23.3073		8	3	1	9	6	9	9	1	6	1	3	5	6	6	1	0	0	0	0	0	0	0	0	0	0	0	0	0	0	0	0	0	0	0	0	0	0	0	0	0	0	1.646	48	17.7166	0	210	210
0	22.7433	0	5	3	8	1	4	9	6	8	2	5	4	4	3	2	1	0	3	1	2	0	3	0	1	1	0	0	0	3	2	0	3	0	3	0	1	3	3	0	0	3	0	1.6	52.9	20.6641	0	600	600
0	22.9131	0	11	3	1	9	4	8	6	2	7	5	2	3	5	2	9	0	0	3	0	0	3	0	0	0	0	0	0	0	0	0	0	0	0	0	0	1	0	0	0	3	0	1.694	43.5	15.1587	0	50	50
0	22.13	0	8	5	1	8	5	1	7	9	4	3	5	3	1	3	9	1	0	0	0	0	3	0	0	0	0	0	0	0	0	0	0	0	0	0	0	0	0	0	0	0	0	1.549	77	32.0913	0	1680	1680
0	23.0965	0	8	3	9	8	3	9	3	1	3	9	6	3	3	4	1	2	0	0	2	0	0	0	0	0	0	0	0	0	0	0	0	0	0	0	0	0	1	1	0	0	0	1.628	96.2	36.2966	0	210	210
0	22.4969	0	8	4	9	1	3	9	6	1	3	9	5	3	5	5	9	0	1	0	0	0	3	2	0	0	0	0	3	0	0	1	2	2	0	3	0	0	0	2	0	0	0	1.556	79.4	32.7945	0	360	360
0	23.4305	0	11	5	9	9	5	1	6	1	5	9	5	6	5	3	1	0	0	0	0	0	0	0	0	0	0	0	0	0	0	1	0	0	0	0	0	0	0	0	0	0	0	1.643	56.9	21.0784	0	63	63
0	23.1129	0	12	4	1	9	4	1	4	1	3	1	4	4	4	4	9	0	0	0	0	0	0	0	0	0	0	0	0	0	0	0	0	0	0	0	0	0	0	0	0	0	0	1.607	56.4	21.8397	0	880	880
0	22.6721	0	2	3	9	2	4	8	6	1	3	4	3	5	3	3	9	0	0	0	1	0	0	0	0	0	0	0	0	0	0	3	3	0	0	3	0	0	0	0	0	0	0	1.536	54.1	22.9306	0	60	60
0	22.3874	0	3	5	1	8	9	6	7	3	2	1	5	4	2	1	1	0	0	0	0	0	1	1	0	0	0	0	0	1	0	0	0	0	0	3	0	0	0	0	0	0	0	1.599	55.2	21.5895	180	300	480
0	22.7707	0	10	6	9	8	4	5	3	1	4	9	8	4	4	3	1	3	2	0	0	2	0	1	1	0	0	0	0	0	0	1	0	0	0	0	0	0	1	0	0	0	0	1.519	92.3	40.0024	0	420	420
0	23.2334	0	12	2	9	9	2	9	3	1	3	9	3	3	3	3	1	1	0	0	0	0	0	0	0	0	0	0	0	0	0	0	0	0	0	1	0	0	0	0	0	1	0	1.636	57.7	21.558	0	105	105
0	23.039	0	10	4	9	9	2	2	7	1	4	9	2	4	4	4	1	0	0	3	0	0	0	0	0	0	0	0	0	0	2	1	0	0	0	3	1	0	0	0	0	2	0	1.531	49.3	21.0328	0	80	80
0	23.1211	0	12	4	1	9	2	9	6	1	4	9	5	4	4	4	1	0	0	0	0	0	0	0	0	0	0	0	0	0	0	0	0	0	0	0	0	0	0	0	0	0	0	1.69	86.9	30.4261	0	1300	1300
0	23.488	0	11	4	9	8	4	9	6	5	9	1	6	6	6	6	9	0	0	0	0	0	0	0	0	0	0	0	0	0	0	0	0	0	0	0	0	0	0	0	0	1	0	1.631	68.2	25.6375	0	975	975
0	23.0034	0	11	3	9	9	1	9	9	1	3	9	4	3	4	4	1	0	0	0	0	0	0	0	0	0	0	0	0	3	0	0	2	0	0	2	0	0	0	0	0	2	0	1.634	67.4	25.2439	0	120	120
0	23.3648	0	10	3	9	8	5	1	9	1	5	9	3	3	3	3	1	3	0	3	0	0	1	0	0	0	0	0	0	0	0	0	0	0	0	0	0	0	0	0	0	0	0	1.635	50	18.704	0	640	640
0	22.8282	0	6	5	9	3	5	1	4	1	3	9						0	0	0	0	0	0	0	0	0	0	0	0	0	0	0	0	0	0	3	0	0	0	0	0	0	0	1.588	52.9	20.9775	0	840	840
0	23.258	0	7	4	9	2	4	1	4	1	4	9	4	4	4	4	1	0	0	0	0	0	0	0	0	0	0	0	0	0	0	0	0	0	0	3	0	0	0	0	0	0	0	1.645	85.9	31.744	0	510	510
0	22.7652	0	11	4	9	1	4	9	5	1	4	9	4	4	4	4	1	0	0	0	0	0	0	0	0	0	0	0	0	0	0	0	0	0	0	1	0	0	0	0	0	0	0	1.531	48.6	20.7341	0	910	910
0	20.4216		7	5	9	9	9	5	9	2	5	9						0	0	0	0	0	3	0	1	0	0	0	1	0	0	0	0	0	0	1	0	1	0	0	0	3	0	1.802	78.6	24.2054	0	1120	1120
0	23.0856	0	6	6	9	8	6	1	6	1	6	1	6	6	6	3	9	0	0	1	0	0	3	0	0	0	0	0	0	0	0	0	0	0	0	3	0	0	0	0	0	0	0	1.614	63.7	24.453	0	300	300
0	23.2717	0	9	2	9	9	2	9	8	1	3	9	4	3	3	3	1	1	0	0	0	0	2	0	0	0	0	1	1	0	0	0	0	1	0	0	0	0	0	1	0	0	0	1.605	66.1	25.6597	0	480	480
0	22.8693	0	12	2	8	1	2	9	4	1	3	9	4	2	2	2	1	2	3	0	0	0	0	0	0	0	3	3	3	0	0	0	0	3	0	0	1	0	0	3	2	0	0	1.57	66	26.7759	0	180	180
0	22.8227	0	10	3	9	9	4	9	5	1	2	9	3	2	2	1	1	1	0	0	0	0	3	0	0	0	0	0	0	0	0	0	0	0	0	0	0	0	0	0	0	0	0	1.601	49.6	19.3508	60	360	420
0	22.8337	0	10	3	9	8	3	9	9	1	4	9	3	3	3	3	1	3	1	0	0	0	0	0	0	0	0	0	0	0	0	0	1	0	0	3	0	0	0	0	0	0	0	1.602	53.5	20.8463	0	135	135
0	22.8063	0	8	5	1	9	5	2	6	1	5	1						0	0	0	0	0	3	0	0	0	0	0	0	0	0	0	0	0	0	0	0	0	0	0	0	0	0	1.574	76.6	30.9186	0	980	980
0	22.7707	0	10	3	9	9	3	1	4	1	2	9	4	3	3	3	1	1	0	0	0	0	0	0	0	0	0	0	0	0	0	0	0	0	0	0	3	0	0	0	0	0	0	1.486	59.4	26.8998	0	210	210
0	22.8063	0	7	4	8	9	5	9	5	1	3	9	4	3	4	4	9	2	0	0	0	0	1	0	0	0	0	1	3	0	1	0	0	1	0	3	0	0	0	2	0	0	0	1.601	67	26.1392	0	200	200
0	22.8392	0	10	5	9	1	5	9	5	1	5	1	5	5	3	3	1	0	0	0	0	0	0	0	0	0	0	0	0	0	0	0	0	0	0	0	0	0	0	0	0	0	0	1.63	61.5	23.1473	0	30	30
0	22.8063	0	5	5	9	2	6	3	4	1	5	9	6	4	4	4	1	0	0	1	1	0	0	1	1	0	0	0	0	0	0	0	0	0	0	0	0	0	0	0	0	0	0	1.614	70.2	26.9482	0	4320	4320
0	22.2478	0	9	5	7	9	4	1	5	1	6	1	5	4	4	4	1	3	1	0	0	0	0	0	0	0	0	3	0	0	0	0	0	0	0	3	0	0	0	0	0	3	0	1.492	61.7	27.7171	1260	0	1260
0	22.7844	0	7	4	9	7	3	2	3	1	2	9	6	3	3	2	1	2	1	0	1	1	0	0	1	0	0	0	1	0	1	0	0	0	0	0	0	0	1	0	3	0	0	1.564	63.7	26.0415	0	90	90
0	22.2067	0	10	5	1	9	4	9	5	2	9	1	5	5	9	3	9	1	0	0	0	0	3	0	0	0	0	0	0	0	0	0	0	0	0	3	0	0	0	0	0	3	0	1.53	64.1	27.3826	0	75	75
0	23.3046	0	10	4	9	1	9	2	8	1	6	9	7	5	5	4	1	0	3	0	0	0	0	0	0	0	0	0	0	0	3	0	0	0	0	3	0	0	0	0	0	0	0	1.602	72.4	28.2107	0	3060	3060
0	23.3895	0	9	2	9	7	3	8	2	9	3	9	5	2	2	2	1	3	2	2	2	0	1	0	0	0	0	0	1	0	0	2	2	0	0	1	0	0	0	1	0	0	0	1.526	62.7	26.9252	0	2730	2730
0	22.8912		10	3	1	9	4	9	3	1	4	8	4	4	4	3	1	3	0	1	0	0	0	0	0	0	0	0	0	0	0	2	0	0	0	3	0	0	0	0	0	2	0	1.609	68.6	26.4979	0	465	465
0	23.1622	0	9	3	9	8	4	7	5	1	2	6	4	3	4	3	1	0	0	0	0	0	0	0	0	0	0	0	1	0	0	0	0	0	0	0	0	0	0	0	0	2	0	1.54	58.2	24.5404	0	40	40
0	23.0554	0	10	5	9	8	3	1	5	1	3	9	4	4	5	2	1	1	0	1	0	0	1	0	3	0	0	0	0	0	0	3	0	0	0	0	2	0	0	0	0	0	0	1.611	50.3	19.381	0	3330	3330
0	23.0363	0	11	4	9	9	4	9	7	1	3	9	5	5	4	5	9	0	0	0	0	0	1	0	0	0	0	0	0	0	0	0	0	0	0	0	0	1	0	0	0	1	0	1.628	74.8	28.2223	0	1860	1860
0	22.7433	0	11	4	9	8	1	9	6	1	4	9	4	4	4	4	9	0	0	0	0	0	0	0	0	0	0	0	0	0	0	0	0	0	0	0	0	0	0	0	0	1	0	1.566	53	21.6119	0	3050	3050
0	22.7953	0	3	7	9	8	4	1	8	1	6	1	3	4	6	5	1	3	0	0	2	3	0	0	0	0	0	0	3	0	0	0	0	0	0	3	0	0	0	0	0	3	0	1.639	68.6	25.5368	0	1260	1260
0	22.7379	0	5	2	9	9	4	1	7	6	3	9	2	4	6	7	1	3	3	0	0	0	3	0	3	0	0	0	0	0	0	3	0	0	0	3	3	0	0	0	0	0	0	1.456	43.1	20.3308	0	210	210
0	22.7105	0	13	4	9	1	4	1	5	1	4	9	4	3	3	3	1	1	0	0	0	0	0	0	0	0	0	0	1	0	0	0	0	0	0	0	0	0	0	0	0	0	0	1.77	69.9	22.3116	0	80	80
0	22.7707	0	2	3	8	7	4	1	3	2	3	9	7	3	2	2	1	2	3	1	0	0	2	0	0	0	0	3	2	0	0	0	0	0	3	1	0	2	0	2	0	1	0	1.657	83.8	30.521	0	660	660
0	23.2964	0	10	5	1	2	4	1	5	3	5	3	5	5	4	5	9	0	0	0	0	0	0	0	1	0	0	0	0	1	0	0	0	0	0	1	0	0	0	0	0	1	0	1.537	50.8	21.5038	0	90	90
0	23.0281	0	9	4	9	1	9	1	8	1	3	9	4	4	3	4	9	3	0	3	3	0	0	0	0	0	0	0	0	0	0	3	0	0	0	3	3	0	0	0	0	3	0	1.586	51.9	20.6329	0	60	60
0	23.2252	0	12	6	1	9	6	1	5	1	6	9	7	6	6	6	1	3	0	0	0	0	0	0	0	0	0	2	2	0	2	0	0	0	0	3	0	0	0	0	0	0	0	1.502	72.9	32.3138	0	1290	1290
0	23.3402	0	11	4	9	2	5	8	3	1	3	9	3	5	6	6	1	3	1	0	3	3	0	0	3	0	0	0	0	3	0	3	0	0	0	0	0	0	0	0	0	3	0	1.594	48.8	19.2063	0	1920	1920
0	22.4285	0	8	3	9	9	2	9	3	1	4	8	6	6	6	6	1	0	0	0	0	0	3	0	0	0	0	0	0	0	0	0	0	0	0	3	0	0	0	0	0	3	0	1.648	84.8	31.2235	0	300	300
0	22.1574		2	3	9	9	2	9	9	1	8	1	3	3	2	3	1	3	0	0	2	3	3	0	0	0	0	0	1	0	0	0	0	0	0	3	0	0	0	0	0	0	0	1.663	62.6	22.6355	0	2580	2580
0	22.0616	0	8	4	1	8	6	1	9	1	4	8	3	4	3	5	1	1	0	0	0	0	0	0	0	0	0	0	0	0	0	0	0	0	0	0	0	0	0	0	0	0	0	1.597	51.9	20.3497	90	0	90
0	22.7762		7	3	9	9	3	9	8	1	3	9	3	3	3	3	1	3	0	0	0	0	3	0	3	0	0	0	0	3	0	0	0	0	0	3	0	0	0	0	0	0	0	1.642	55.5	20.5848	0	2550	2550
0	22.6995	0	12	4	9	9	4	1	4	1	4	9	6	4	4	4	1	1	0	0	0	0	3	1	0	0	0	0	2	0	0	0	0	1	0	0	0	0	0	1	0	1	0	1.592	95.8	37.7989	0	0	0
0	23.3292	0	10	5	9	8	5	1	5	1	5	9	5	3	5	5	9	3	0	3	0	0	3	0	0	0	0	0	0	0	3	0	1	1	0	3	0	0	0	0	0	0	0	1.622	64.7	24.5925	0	420	420
0	23.1704	0	10	3	9	8	2	9	3	1	7	1	5	3	3	2	9	3	2	3	0	3	0	0	0	0	0	0	1	0	0	2	0	0	0	3	2	3	0	0	0	3	0	1.628	65.5	24.7134	0	540	540
0	22.5188	0	4	5	1	7	4	9	8	2	4	9	7	4	9	2	9	0	0	0	0	0	0	0	0	0	0	0	0	0	0	0	0	0	0	1	0	0	0	0	0	1	0	1.548	70.7	29.5038	0	1350	1350
0	22.6338	0	11	1	9	9	3	9	4	1	2	8	2	2	2	2	1	0	0	0	0	0	1	3	0	0	0	0	0	0	0	0	0	0	0	3	0	0	0	0	2	0	0	1.645	55.6	20.5467	0	960	960
0	22.8994	0	8	3	9	8	6	1	5	1	4	9	5	6	6	6	1	3	0	0	0	0	1	0	0	0	0	0	0	0	0	0	0	0	0	1	0	1	0	0	0	0	0	1.55	52.1	21.6857	0	210	210
0	23.0007	0	7	2	9	8	2	9	6	1	4	9	2	2	2	2	1	0	0	0	0	0	0	0	0	0	0	0	0	0	0	0	0	0	0	0	0	0	0	0	0	3	0	1.603	48.8	18.9912	0	20	20
0	22.6995	0	10	4	1	9		4	4	1	9	1	3	4	4	4	1	0	0	0	0	0	0	0	0	0	0	0	0	0	0	0	0	0	0	0	3	0	0	0	0	0	0	1.616	47.6	18.2274	0	240	240
0	22.5024	0	6	3	8	1	4	1	5	1	5	1	6	5	5	5	1	3	0	0	0	0	3	0	0	0	0	1	0	0	0	0	0	0	0	0	0	0	0	0	0	0	0	1.589	75.2	29.7831	0	4560	4560
0	23.3155	0	12	4	8	9	3	8	6	1	4	7	4	3	3	3	1	1	0	0	0	0	0	0	0	0	0	0	0	0	0	0	0	0	0	0	0	0	0	0	0	3	0	1.461	58.6	27.4535	0	60	60
0	22.7324	0	9	3	1	9	3	9	3	1	3	9	3	3	3	3	1	3	1	1	0	0	1	0	0	0	0	0	0	1	0	0	0	0	0	0	1	1	0	0	0	0	0	1.628	49.4	18.6388	0	1260	1260
0	22.9405	0	13	6	2	9	5	9	4	1	5	1	6	5	2	1	1	3	1	1	0	3	3	3	0	0	0	0	2	0	3	1	1	1	0	0	0	0	3	2	0	0	0	1.664	83.4	30.1203	420	0	420
0	22.59	0	3	4	9	8	3	9	5	1	4	1	4	8	4	4	1	0	0	0	0	0	3	3	0	0	0	0	0	0	3	0	0	0	0	0	0	0	0	0	0	3	0	1.71	69.8	23.8706	0	1260	1260
0	22.6749	0	11	5	9	9	4	9	7	1	4	9	4	4	4	2	1	3	0	0	0	0	2	0	0	0	0	0	0	0	0	0	0	0	0	3	0	0	0	0	0	0	0	1.599	71.6	28.0037	0	120	120
0	22.7953	0	10	4	9	1	3	9	7	1	3	9	3	3	3	3	1	0	0	0	0	0	0	0	1	0	0	0	0	0	0	0	0	0	0	3	0	0	0	0	0	0	0	1.659	48.7	17.6944	0	60	60
0	22.8172	0	7	3	1	9	2	9	9	1	3	9	3	2	4	2	1	3	1	0	0	0	0	0	0	0	0	0	2	0	1	0	0	0	0	0	0	0	0	0	0	0	0	1.606	49	18.9979	360	90	450
0	22.7379	0	8	7	1	9	8	1	6	1	5	9	3	5	5	4	1	2	0	0	0	0	0	0	0	0	0	0	0	0	0	0	0	0	0	0	0	0	0	0	0	0	0	1.57	43.7	17.7289	0	730	730
0	22.7817	0	5	2	9	1	3	1	9	1	3	9	7	3	3	3	9	3	0	3	0	0	0	0	0	0	0	3	0	3	3	0	0	0	0	0	0	2	0	0	0	3	0	1.608	76.8	29.7022	0	330	330
0	22.3436	0	9	1	9	5	3	7	3	1	2	1	3	3	3	3	1	0	0	0	0	0	0	0	0	0	0	0	0	0	0	0	1	0	0	1	0	0	0	0	0	0	0	1.716	57.6	19.5609	0	240	240
0	23.384	0	8	2	9	9	2	9	6	1	3	9	3	2	3	2	1	0	0	1	0	0	0	0	0	0	0	0	0	0	0	0	0	0	0	2	0	0	0	0	0	0	0	1.618	60.7	23.1863	0	0	0
0	23.2909	0	11	2	9	9	7	1	9	1	3	1	4	2	2	2	1	3	0	0	0	0	1	1	0	0	0	3	3	0	3	0	0	1	0	2	0	0	0	2	0	0	0	1.678	70.1	24.8963	0	140	140
0	23.2772	0	8	5	9	9	3	1	3	1	5	9	8	5	5	5	9	0	0	3	2	0	3	0	0	0	0	0	0	0	0	0	0	0	3	0	0	0	0	0	0	3	0	1.63	92.6	34.8526	0	3060	3060
0	22.5435	0	10	5	1	2	4	9	6	1	4	1	4	3	3	3	1	2	0	0	1	0	3	0	0	0	0	0	0	0	3	0	0	0	3	1	0	0	0	2	0	0	0	1.631	68.4	25.7127	2700	1050	3750
0	23.2498	0	9	3	9	1	2	9	4	9	3	9	3	2	4	3	1	3	0	0	0	0	0	0	0	0	0	0	0	0	0	0	0	0	0	0	0	0	0	0	0	0	0	1.607	55.5	21.4912	0	970	970
0	23.3539	0	8	5	1	9	5	4	7	1	6	1	6	5	5	5	1	0	0	0	0	0	0	0	0	0	0	0	0	0	0	0	0	0	0	0	0	0	0	0	0	0	0	1.697	66.9	23.2307	0	1140	1140
0	22.82	0	8		5	1	1	4	7	1	5	1	5	4	4	5	9	0	0	0	0	0	0	0	0	0	0	1	1	0	1	0	0	0	0	0	0	0	0	0	0	1	0	1.606	94	36.4449	240	0	240
0	23.3292	0	7	8	1	2	7	1	9	2	3	1	8	6	8	8	9	0	0	2	0	0	0	0	0	0	0	0	0	0	0	0	0	0	0	1	0	0	0	0	0	0	3	1.626	94.3	35.6673	0	450	450
0	22.4476	0	8	2	9	9	1	9	3	1	5	2	3	3	3	3	1	3	1	1	0	0	0	0	1	0	0	0	0	0	0	3	0	0	0	0	0	0	0	0	0	3	0	1.64	55.2	20.5235	0	1020	1020
0	22.8282	0	8	3	9	2	4	7	5	1	4	9	4	3	8	4	9	1	2	3	3	1	3	3	0	0	0	1	2	0	2	3	1	2	3	3	1	2	3	0	3	1	0	1.534	59.5	25.2852	0	2800	2800
0	22.757	0	13	5	9	9	5	1	9	1	5	9	5	6	6	1	1	1	0	0	0	0	0	0	0	0	0	0	0	1	0	1	0	0	0	3	0	0	0	0	0	0	0	1.578	49.6	19.919	0	1860	1860
0	23.3073	0	7	5	9	1	8	2	6	1	8	1	7	5	6	5	9	3	0	2	1	0	1	0	0	0	0	0	0	0	0	0	0	0	0	1	0	0	0	0	0	0	0	1.552	80.3	33.3374	0	450	450
0	23.3347	0	6	5	9	8	3	9	8	1	4	7	5	3	2	2	1	3	0	2	0	3	3	2	0	0	0	0	3	0	0	0	3	0	0	0	0	3	0	0	0	3	0	1.643	75.3	27.8946	0	140	140
0	22.9925		9	6	9	9	6	1	4	1	6	1	6	6	6	6	9	0	0	0	0	0	3	0	0	0	0	0	0	0	0	0	0	0	0	1	0	0	0	0	0	0	0	1.65	90.2	33.1313	0	420	420
0	22.5708	0	10	3	9	9	5	9	6	1	3	1	4	2	3	2	1	3	1	0	0	0	0	2	0	0	0	0	1	0	0	0	0	0	0	3	0	0	0	1	0	0	0	1.516	63.1	27.4556	0	360	360
0	23.6934	0	12	3	9	9	5	9	5	1	3	9	5	3	5	4	1	1	0	0	0	0	0	0	0	0	0	0	1	0	1	0	0	0	0	1	0	0	0	0	0	0	0	1.553	68.2	28.2775	0	640	640
0	22.757	0	11	4	1	9	4	1	9	1	4	9	4	4	4	4	9	0	0	0	0	0	3	0	0	0	0	0	0	0	0	0	0	0	0	0	0	0	0	0	0	3	0	1.545	56.4	23.6277	0	80	80
0	22.935	0	8	3	9	4	4	9	3	1	4	9	2	3	3	3	1	3	0	3	0	0	0	0	0	0	0	0	0	3	0	0	0	0	0	3	3	0	0	0	0	0	0	1.699	54.6	18.915	0	245	245
0	22.7132	0	9	4	9	8	7	6	3	1	8	1	3	5	9	9	1	0	0	1	3	0	0	0	1	0	0	1	0	3	0	0	0	0	0	0	3	0	0	0	0	0	0	1.609	50.1	19.352	0	330	330
0	22.6502	0	13	5	1	9	3	9	6	1	4	9	5	5	4	5	9	3	2	0	0	0	0	0	2	0	0	0	0	3	1	1	0	0	0	3	2	1	0	0	0	2	0	1.623	52.4	19.8927	0	460	460
0	22.6667	0	12	5	9	8	5	1	4	1	5	9	5	5	5	5	9	0	0	0	0	0	3	0	0	0	0	0	0	0	0	0	0	0	0	0	0	0	0	0	0	0	0	1.58	54.1	21.6712	0	860	860
0	22.7296	0	8	4	9	1	4	9	5	1	3	9	6	4	6	4	1	0	0	1	0	0	0	0	0	0	0	0	3	0	0	0	0	0	0	3	0	0	0	0	0	0	0	1.532	58.2	24.7974	0	690	690
0	22.7269	0	10	3	8	9	3	9	5	1	3	9	7	5	3	3	9	3	2	1	3	0	0	0	0	0	0	0	0	3	3	0	0	0	2	0	0	0	0	1	0	0	0	1.562	99.8	40.9043	0	200	200
0	22.5188	0	10	2	9	8	1	9	1	9	4	9	3	3	1	2	1	0	0	0	0	0	0	2	0	0	0	0	0	0	0	0	0	0	0	2	0	0	0	0	0	0	0	1.549	61.4	25.5897	15	1875	1890
0	22.6804	0	8	6	9	9	6	1	3	9	6	1	8	7	6	6	9	2	0	0	0	0	1	1	0	0	2	0	2	0	2	0	0	2	2	1	0	0	0	2	0	0	0	1.642	98.6	36.5705	0	140	140
0	22.9158	0	11	4	9	1	4	2	9	1	2	8	4	2	4	4	1	0	0	0	0	0	1	0	0	0	0	0	0	0	0	0	0	0	0	0	0	0	0	0	0	0	0	1.695	79.5	27.6712	0	210	210
0	22.4641	0	8	4	1	9	4	8	3	1	5	9	4	2	3	4	1	3	1	0	1	0	3	3	1	0	0	0	1	0	0	0	0	0	1	0	0	0	0	0	0	0	0	1.643	64.5	23.8938	0	280	280
0	22.6612	0	9	4	9	1	3	9	4	1	5	1	4	5	1	9	1	3	2	0	0	1	1	1	1	0	0	0	1	3	0	1	0	0	0	0	3	0	3	0	0	3	0	1.686	62.1	21.8462	0	30	30
0	22.9979	0	11	1	8	9	1	7	3	2	4	8	1	1	1	1	1	0	2	0	3	0	0	3	0	0	0	0	0	0	0	0	0	0	3	0	2	0	0	3	3	0	0	1.637	53.2	19.8525	0	450	450
0	23.4442	0	11	3	9	1	3	1	9	1	3	9	4	3	3	3	1	2	0	0	0	0	0	0	0	0	0	0	0	0	0	0	0	0	0	0	0	0	0	0	0	0	0	1.689	64.7	22.6801	0	140	140
0	22.8145	0	6	3	9	9	3	9	6	1	3	9	3	3	4	4	1	3	2	0	2	3	3	3	3	0	0	3	0	0	3	3	0	1	0	0	3	0	1	1	1	0	0	1.618	54.5	20.818	0	420	420
0	22.9103	0	6	4	1	9	6	9	6	1	7	1	3	4	4	4	1	3	0	1	0	0	0	0	0	0	0	0	0	1	0	0	3	0	0	3	3	0	0	0	0	3	0	1.593	50.4	19.8609	0	270	270
0	22.7817	0	7	2	9	1	4	9	2	1	4	9	2	4	4	2	1	0	0	1	0	0	0	0	3	0	0	0	0	0	0	0	0	0	0	1	2	0	0	0	0	3	0	1.664	63.7	23.0056	0	2430	2430
0	22.4148	0	12	3	8	9	3	8	5	1	4	9	5	3	3	3	1	2	1	0	0	0	2	2	0	0	0	1	1	0	1	0	2	0	0	1	0	0	0	0	0	0	0	1.605	66.2	25.6985	0	300	300
0	22.7406	0	9	3	9	9	3	9	3	1	3	9	5	3	3	3	9	1	1	0	1	1	3	0	1	0	0	0	2	0	0	1	0	0	0	1	0	0	1	0	1	0	0	1.56	101.2	41.5845	0	420	420
0	22.4586	0	11	5	1	9	5	9	4	8	3	1	3	5	3	3	9	0	0	0	0	0	0	0	0	0	0	0	0	0	0	0	0	0	0	2	0	0	0	0	0	3	0	1.672	56.7	20.282	0	1320	1320
0	22.4422	0	11	4	1	8	4	9	9	1	4	9	4	4	4	4	1	0	0	0	0	1	0	0	0	0	0	0	0	0	0	0	0	0	0	2	0	0	0	0	0	0	0	1.52	56	24.2382	0	100	100
0	22.6776	0	6	3	9	9	2	9	5	1	4	9	4	3	3	4	1	0	0	0	0	0	2	0	0	0	0	0	1	0	0	0	0	0	0	0	0	0	0	1	0	0	0	1.538	68.8	29.0854	0	360	360
0	22.6694	0	5	4	9	9	4	9	4	1	4	9	8	4	4	4	1	0	0	1	0	0	0	0	0	0	0	0	0	0	0	0	2	0	0	0	0	1	2	0	0	1	0	1.695	82.4	28.6806	0	1060	1060
0	23.1978	0	11	4	1	3	4	8	3	2	9	1	8	5	3	7	1	3	2	0	0	2	2	0	0	0	0	2	1	0	0	0	0	1	0	2	0	0	3	1	0	0	0	1.532	89.6	38.176	0	180	180
0	22.3792	0	9	4	9	8	4	8	9	1	4	1	4	4	2	4	9	0	0	3	3	0	1	0	0	0	0	0	0	0	0	0	0	0	3	3	0	0	0	0	0	3	0	1.532	53.7	22.88	240	20	260
0	22.7844	0	3	6	9	1	4	9	6	1	4	9	9	8	8	8	9	0	0	0	0	0	3	0	0	0	0	0	0	0	0	0	0	0	0	0	0	0	0	0	0	0	0	1.576	89.2	35.9131	60	80	140
0	22.7023	0	11	3	1	9	3	9	5	1	3	6	5	3	3	3	1	2	1	0	0	0	0	0	0	0	0	2	0	0	2	3	0	0	0	0	0	0	0	0	0	2	0	1.611	57.5	22.1553	0	0	0
0	22.7543	0	11	3	9	9	2	1	3	9	3	9	5	3	8	3	1	2	0	0	1	0	0	0	0	0	0	2	0	0	0	0	0	0	0	0	0	0	0	0	3	0	0	1.725	69.9	23.4909	0	20	20
0	23.1129	0	5	3	9	8	6	1	6	1	3	9	3	3	3	3	9	0	0	0	0	0	2	0	0	0	0	0	0	0	0	0	0	0	3	0	0	0	0	0	0	3	0	1.755	60	19.4804	60	700	760
0	22.4038	0	11	3	9	1	4	9	4	1	6	9	4	3	3	4	1	3	0	0	0	0	3	0	0	0	0	3	3	0	0	0	0	0	0	1	0	1	0	0	0	0	0	1.58	63.6	25.4767	0	90	90
0	23.165	0	11	3	9	1	5	9	9	1	4	9	4	4	4	4	9	0	0	0	0	0	0	0	0	0	0	0	0	0	0	0	0	0	0	0	0	0	0	0	0	0	0	1.582	53.5	21.3767	0	0	0
0	22.3874	0	9	2	9	9	5	9	1	1	3	7	3	3	3	3	1	0	0	1	0	0	0	0	0	0	0	0	0	0	0	0	0	0	0	0	0	0	0	0	0	0	0	1.568	58.4	23.7531	0	190	190
0	22.9158	0	11	2	9	8	2	8	4	1	9	1	2	3	8	2	1	1	0	0	2	0	0	0	0	0	0	0	2	2	2	2	0	0	0	0	0	0	0	0	0	0	0	1.568	52.8	21.4754	0	300	300
0	23.3046	0	2	6	9	1	5	1	9	1	9	1	7	8	1	1	9	0	0	1	0	0	3	0	0	0	0	0	0	0	0	0	0	0	0	0	0	0	0	0	0	0	0	1.619	66	25.1797	0	520	520
0	22.9706	0	13	3	9	9	4	9	4	1	4	1	5	4	4	4	1	1	0	0	0	0	1	0	0	0	0	0	0	0	0	0	0	0	0	3	0	0	0	0	0	1	0	1.598	72.3	28.3129	0	100	100
0	23.0171	0	3	2	9	9	4	8	7	1	2	9	3	3	4	3	1	0	0	0	0	0	1	0	0	0	0	0	0	0	0	0	0	0	0	3	0	0	0	0	0	0	0	1.592	53.7	21.1879	0	650	650
0	22.8282	0	9	6	1	9	4	1	9	1	6	2	4	6	4	6	9	2	0	0	1	0	3	0	0	0	0	0	0	0	0	1	0	0	0	3	0	0	0	0	0	0	0	1.63	55.4	20.8514	0	660	660
0	22.7433	0	9	1	8	9	3	8	4	1	1	7	4	1	5	2	1	2	0	0	0	2	3	0	0	0	3	0	1	0	0	3	0	0	0	3	0	0	0	2	0	0	0	1.684	77.4	27.2933	0	80	80
0	23.2608	0	7	4	1	1	9	2	8	1	5	1	4	6	6	5	9	0	3	0	1	0	0	0	0	0	0	0	0	0	0	2	0	0	0	0	0	0	0	0	0	3	0	1.574	53.2	21.4735	0	360	360
0	22.7625	0	12	3	9	9	3	9	4	1	3	9	3	3	3	3	1	1	0	0	0	0	0	0	1	0	0	0	0	3	0	0	0	0	0	1	0	0	0	0	0	0	0	1.596	45	17.6663	0	210	210
0	22.8528	0	9	4	9	9	3	1	5	1	9	9	4	3	3	3	1	0	0	0	0	0	0	0	0	0	0	0	0	0	0	0	0	0	0	1	0	0	0	0	0	0	0	1.603	69.6	27.0858	0	690	690
0	22.7433	0	10	5	1	7	5	9	6	9	3	9	6	5	6	6	1	0	0	0	0	3	1	0	0	0	0	0	0	0	0	0	0	0	0	0	0	0	0	0	0	0	0	1.585	58.7	23.3657	0	210	210
0	23.1102	0	10	3	9	1	4	8	4	1	5	9	9	6	6	6	9	0	0	0	0	0	0	0	1	0	0	0	0	0	0	0	1	0	0	3	0	0	0	0	0	0	3	1.475	96.9	44.5389	0	390	390
0	23.321	0	7	4	9	1	4	9	5	1	4	9	5	4	4	4	1	3	0	0	0	0	0	0	0	0	0	0	0	0	0	0	0	0	0	3	0	0	0	0	0	0	0	1.538	55.5	23.4628	0	0	0
0	22.6995	0	7	3	9	9	3	1	3	1	4	1	3	3	4	3	9	0	0	0	0	0	0	0	0	0	0	0	0	0	0	1	0	0	0	0	0	0	0	0	0	3	0	1.406	45.7	23.1178	0	120	120
0	22.7899	0	11	4	9	9	5	2	5	1	5	9	6	6	6	6	1	3	0	0	0	0	0	3	0	0	0	0	0	0	0	0	0	0	0	0	0	0	0	0	0	0	0	1.481	63.7	29.0422	0	780	780
0	23.0992	0	11	4	9	1	9	1	9	1	9	1	7	4	4	4	9	0	0	2	2	0	3	0	0	0	0	0	0	0	0	0	0	0	0	0	0	0	0	0	0	0	0	1.624	103.8	39.3573	0	645	645
0	23.321	0	6	3	9	1	3	9	6	1	3	1	3	4	4	3	1	3	0	0	1	0	0	0	0	0	0	0	0	0	0	0	0	0	0	0	0	1	0	0	0	0	0	1.655	57	20.8103	0	980	980
0	23.2416	0	10	3	9	9	4	1	9	1	5	1	4	4	4	4	9	3	0	0	0	0	3	0	2	0	0	0	2	0	0	2	0	0	2	3	0	0	3	0	0	0	0	1.542	69.1	29.0609	1440	60	1500
0	22.7077	0	6	3	9	8	5	9	6	1	4	1	3	5	3	3	1	3	2	0	0	0	0	0	3	0	0	0	0	0	0	0	0	0	0	1	1	1	0	0	0	3	0	1.541	40.3	16.9707	0	420	420
0	22.7132	0	9	4	1	8	6	1	6	1	6	8	6	6	6	6	1	0	0	0	0	0	1	0	0	0	0	0	0	0	0	3	0	0	0	3	0	0	0	0	0	0	0	1.565	73.1	29.8462	0	250	250
0	23.5756	0	8	6	1	1	6	1	6	1	6	1	2	6	2	2		0	0	0	0	1	0	0	0	0	0	0	0	0	0	0	0	0	0	1	0	0	0	0	0	3	0	1.634	47.7	17.8655	0	560	560
0	23.2115	0	8	4	9	8	4	1	8	1	5	9	4	4	4	4	1	1	0	0	0	0	0	0	0	0	0	0	0	0	0	1	0	0	0	3	3	0	0	0	0	1	0	1.582	60.5	24.1737	0	180	180
0	23.2991	0	10	5	9	9	4	9	5	1	5	9	5	3	4	4	1	3	2	0	0	0	2	3	1	0	0	3	3	0	0	3	0	0	3	0	3	0	3	3	3	0	0	1.531	60.6	25.8537	0	675	675
0	23.1622	0	10	2	9	9	3	9	6	1	2	9	2	2	2	2	9	3	0	0	0	2	0	0	0	0	0	3	0	0	0	0	0	0	0	0	0	0	0	0	0	0	0	1.605	48.5	18.8275	0	150	150
0	22.7077	0	7	4	9	2	6	7	4	2	5	1	9	4	4	4	1	1	0	1	3	0	1	1	0	0	0	3	3	0	3	0	0	3	3	3	0	0	0	3	3	3	0	1.674	110	39.2538	0	30	30
0	17.1745	0	9	3	8	8	3	8	3	1	3	8	2	3	2	3	1	0	3	0	0	0	0	0	0	0	0	0	0	0	0	0	0	0	0	3	0	0	0	0	0	3	0	1.61	51.9	20.0224	0	210	210
0	23.1047	0	10	6	1	8	3	1	9	1	6	8	6	6	6	6	9	2	0	0	0	0	0	0	0	0	0	0	0	0	0	2	0	0	0	2	0	0	3	0	0	0	0	1.612	80.8	31.0943	0	120	120
0	23.1266	0	11	4	9	8	3	1	4	1	2	1	6	6	4	6	1	0	0	0	0	0	0	0	0	0	0	0	0	0	0	1	0	0	0	2	0	0	0	0	0	0	0	1.632	82	30.7874	0	84	84
0	23.1595	0	6	4	9	9	5	9	3	1	4	9	5	2	2	2	1	3	0	1	0	0	0	1	0	0	0	0	3	0	3	0	1	0	0	0	0	0	0	0	0	0	0	1.479	55.2	25.235	0	60	60
0	22.7762	0	4	3	9	1	3	1	4	1	3	9	2	3	3	3	1	0	0	0	0	0	0	0	0	0	0	0	0	0	0	0	0	0	0	2	0	0	0	0	0	0	0	1.534	48.2	20.4831	0	3000	3000
0	23.0363	0	9	4	9	1	4	9	4	1	4	9	4	4	4	4	9	0	0	3	3	1	0	0	0	0	0	0	0	0	0	3	0	0	0	1	0	3	0	0	0	0	0	1.538	51.4	21.7295	0	480	480
0	22.8802	0	12	3	9	7	3	9	6	2	3	9	3	3	4	3	1	3	0	0	0	0	3	0	2	0	0	0	0	1	0	2	0	0	0	0	0	0	0	0	0	2	0	1.594	53.3	20.9773	0	30	30
0	23.4387	0	11	5	1	9	4	9	4	1	3	9	6	4	4	4	1	1	0	0	0	1	1	1	1	0	0	0	0	0	0	0	0	0	0	1	0	0	0	1	1	1	0	1.615	74.7	28.6402	0	840	840
0	22.872	0	5	4	9	1	8	7	3	1	4	9	7	4	4	4	1	3	3	3	1	0	0	0	0	0	0	1	1	0	0	0	0	0	1	1	0	0	0	0	0	0	0	1.566	72.1	29.4003	0	450	450
0	22.3682	0	6	4	9	1	4	9	7	1	4	9	4	4	3	4	1	3	0	0	0	0	0	0	2	0	0	0	0	0	0	0	0	0	0	3	0	0	0	0	0	0	0	1.662	94.8	34.3199	0	750	750
0	22.9295	0	7	4	8	9	2	1	4	9	8	9	4	5	4	4	1	0	0	0	0	0	3	0	0	0	0	1	3	0	0	0	0	0	0	0	0	0	0	0	0	0	0	1.594	61.4	24.1653	0	280	280
0	22.8775	0	8	6	9	2	4	9	3	1	4	9	6	6	4	4	1	3	0	0	0	0	1	0	0	0	0	0	0	0	0	0	0	0	0	1	0	0	0	0	0	0	0	1.628	69.9	26.3735	0	70	70
0	23.4086	0	12	4	9	1	4	9	5	9	4	9	5	4	3	4		1	0	0	0	0	1	0	0	0	0	0	0	0	0	0	0	0	0	0	0	0	0	0	0	0	0	1.65	68.2	25.0505	0	720	720
0	21.8809		5	3	9	9	3	9	5	2	3	9	6	3	3	3	1	3	0	0	0	0	0	0	0	0	0	0	0	0	3	0	0	0	0	0	0	0	0	0	0	3	0	1.668	84.4	30.3354	0	0	0
0	22.0808	0	7	9	1	8	5	7	6	1	4	1	5	5	4	2	9	0	0	0	0	0	0	0	0	0	0	0	0	0	0	0	0	0	0	1	0	0	0	0	0	0	0	1.604	76.1	29.5785	0	1650	1650
0	22.6749	0	7	5	9	1	4	7	8	1	2	9	4	3	9	9	1	3	1	0	0	0	2	1	0	0	0	0	0	0	0	1	3	1	0	0	3	0	0	0	0	0	0	1.542	47.4	19.9347	0	1080	1080
0	22.4066	0	12	4	9	1	3	6	5	1	4	9	5	4	5	5	1	3	0	0	0	0	1	3	0	0	0	0	2	0	1	1	0	0	0	3	0	0	0	2	0	0	0	1.509	77.4	33.9909	300	60	360
0	23.7947	0	6	5	8	1	4	1	9	1	5	1	5	5	4	4	9	0	0	0	0	0	1	0	0	0	0	0	0	0	0	0	0	0	0	0	0	0	0	0	0	3	0	1.619	61.3	23.3866	0	540	540
0	22.8337	0	13	3	9	9	2	9	4	1	4	9	4	3	3	3	1	0	0	0	0	0	0	0	0	0	0	0	0	0	0	0	0	0	0	0	0	0	0	0	0	1	0	1.556	50.1	20.6928	90	270	360
0	23.2307	0	10	4	1	3	5	9	4	1	4	9	4	4	4	4	1	0	0	0	0	0	0	0	2	0	0	0	0	2	0	0	0	0	0	2	0	0	0	0	0	2	0	1.526	41.9	17.9931	0	180	180
0	23.2991	0	9	5	1	8	4	9	9	1	5	7	5	3	5	3	1	2	1	1	0	2	3	0	0	0	1	1	1	0	1	1	1	1	0	0	1	0	0	2	1	0	0	1.569	99	40.2151	0	150	150
0	22.8392	0	12	4	9	9	2	1	4	9	4	9	5	4	6	4	1	3	0	2	0	3	3	3	3	0	0	1	3	0	3	0	3	3	0	3	3	3	3	3	0	0	0	1.517	59.4	25.8116	0	120	120
0	22.8227	0	6	4	9	8	6	1	9	1	5	1	4	6	9	4	1	3	0	0	0	0	0	0	0	0	0	0	0	0	0	0	3	3	0	0	0	0	0	3	0	0	0	1.631	62.6	23.5324	0	120	120
0	23.0253	0	8	3	9	9	3	1	5	1	3	1	3	4	4	4		1	0	3	3	0	0	0	0	0	0	0	0	0	0	0	0	0	0	0	0	0	0	0	0	0	0	1.57	53.6	21.7453	0	960	960
0	23.0171		7	2	9	8	2	1	7	1	5	1	4	6	4	3	1	3	0	0	0	0	0	0	0	0	0	0	0	0	0	0	0	0	0	0	0	0	0	0	0	0	0	1.712	68.9	23.5078	0	630	630
0	22.0917	0	11	3	1	9	3	1	6	1	2	9	4	5	4	5	9	0	0	3	3	0	0	3	3	0	0	0	3	3	3	0	3	0	0	3	0	0	0	0	0	0	0	1.578	42.5	17.0677	70	0	70
0	23.2772	0	10	3	9	7	3	1	9	1	3	9	3	3	3	3	9	0	0	3	0	0	3	0	0	0	0	0	0	0	0	0	0	0	0	0	0	0	0	0	0	0	0	1.58	58.8	23.5539	0	150	150
0	23.2416	0	7	4	1	2	4	2	5	9	3	9	5	3	3	3	1	3	0	0	0	0	2	0	0	0	0	0	0	0	0	2	0	0	0	0	2	0	0	0	0	0	0	1.605	77.9	30.2404	0	210	210
0	23.2745	0	10	4	9	1	4	7	6	2	3	8	4	3	3	3	9	0	0	0	0	0	0	0	0	0	0	0	0	0	0	0	0	0	0	3	0	0	0	0	0	0	0	1.488	44	19.8722	0	2520	2520
0	22.7762	0	8	3	9	8	5	2	7	1	5	9	5	3	3	1	1	3	0	0	0	2	1	0	0	0	0	0	0	0	0	0	0	0	0	3	0	0	0	0	0	3	0	1.624	73.4	27.8307	0	600	600
0	22.9897	0	10	3	9	8	5	4	1	2	6	6	5	4	3	2	1	3	0	0	3	0	3	0	0	0	0	0	0	0	0	0	0	0	0	1	0	0	0	0	0	0	0	1.539	55.6	23.4746	0	1170	1170
0	22.9815	0	11	6	1	7	5	1	7	1	4	9	4	4	4	4	1	3	0	0	0	0	0	0	0	0	0	0	0	1	0	0	0	0	0	3	1	0	0	0	0	0	0	1.534	41.9	17.8059	0	160	160
0	22.8446	0	9	4	9	1	4	9	5	1	4	9	6	4	6	6	1	0	0	0	0	0	0	0	0	0	0	0	3	0	0	0	0	0	2	0	0	0	0	1	0	0	0	1.612	101.4	39.0219	0	490	490
0	22.7515	0	8	3	7	9	3	9	3	1	3	7	2	3	3	9	1	0	0	0	0	0	1	0	0	0	0	0	0	1	0	0	0	0	0	0	0	0	0	0	0	0	0	1.713	65.1	22.1853	0	480	480
0	22.6858	0	8	3	9	1	5	1	9	1	5	1	3	2	2	2	1	3	0	0	0	0	3	0	0	0	0	0	3	0	3	0	0	0	0	0	0	0	0	0	0	3	0	1.638	68.1	25.3816	0	840	840
0	23.0992	0	7	4	1	9	6	3	5	1	4	8	4	4	5	4	1	3	1	0	0	1	3	0	0	0	0	0	0	0	0	0	0	0	0	0	0	0	0	0	0	1	0	1.707	54.8	18.8067	0	1950	1950
0	22.4531	0	11	3	9	9	3	9	3	1	3	9	2	3	4	3	1	3	0	0	0	0	0	0	3	0	0	0	0	3	0	0	0	0	0	3	3	0	0	0	0	2	0	1.632	49.1	18.4349	0	600	600
0	22.7899	0	11	3	9	1	3	9	6	1	3	9	3	3	3	3	1	2	0	0	0	0	0	0	0	0	0	0	0	0	0	1	0	0	0	0	0	0	0	0	0	1	0	1.849	65.9	19.2758	0	990	990
0	23.5264	0	13	3	9	9	4	1	2	1	3	9	3	3	3	3	9	0	0	0	1	0	0	0	0	0	0	0	0	0	0	0	0	0	0	2	0	0	0	0	0	0	0	1.711	69.7	23.8085	0	300	300
0	22.8638		8	4	9	8	4	1	9	1	4	1	4	6	6	6	9	3	0	0	0	0	1	1	0	0	0	0	0	0	0	0	0	0	0	3	0	0	0	0	0	0	0	1.569	54.1	21.9761	0	250	250
0	22.9979	0	10	5	1	9	5	9	9	1	5	1	5	5	5	5	9	0	0	1	0	0	0	0	0	0	0	0	0	0	0	3	0	0	0	3	0	0	0	0	0	3	0	1.509	65.6	28.8088	0	700	700
0	22.8392	0	10	4	9	9	3	1	4	9	3	9	3	3	3	3	1	3	0	0	0	0	0	0	2	0	0	0	0	2	0	0	0	0	0	2	2	0	0	0	0	2	0	1.68	60.6	21.4711	0	200	200
0	22.9569	0	6	3	9	8	2	8	1	9	3	9	3	3	1	3	1	2	3	3	0	0	0	0	0	0	0	0	0	0	0	2	0	0	0	0	2	3	0	0	0	0	0		52.5		0	360	360
0	23.0828	0	10	3	9	8	3	9	6	9	3	9	5	3	5	5	1	3	2	0	0	2	2	0	0	0	0	0	2	0	0	0	0	0	0	3	0	0	2	0	0	0	0	1.643	69	25.5608	120	290	410
0	23.3676	0	7	4	8	9	6	2	9	1	3	8	6	5	1	3	1	0	3	0	3	0	1	0	0	0	0	0	0	3	0	2	0	0	0	0	0	0	0	0	0	0	0	1.617	68.9	26.3511	0	1170	1170
0	22.7652	0	7	7	1	9	5	8	4	2	5	2	6	5	6	3	9	3	0	0	0	0	3	0	0	0	0	0	0	0	0	3	0	0	0	0	0	0	3	0	0	0	0	1.688	65.8	23.093	0	1680	1680
0	22.7105	0	8	4	8	1	5	2	7	1	8	9	4	3	7	4	1	3	0	0	0	0	0	0	0	0	0	0	0	0	1	3	3	0	0	2	0	0	0	0	0	0	0	1.7	75.9	26.263	0	740	740
0	23.0746	0	10	4	9	9	3	9	8	1	4	9	4	4	4	4	1	3	0	0	0	0	0	0	0	0	0	0	3	0	0	0	0	0	0	3	0	0	0	0	0	0	0	1.641	61.2	22.7266	1440	100	1540
0	23.0418	0	11	5	1	9	4	9	6	1	4	9	7	5	5	5	1	3	0	0	0	0	3	0	0	0	0	0	0	0	0	0	0	0	0	0	0	0	0	0	0	0	0	1.653	80.1	29.3148	0	30	30
0	23.4497		11	4	9	9	4	9	9	1	3	9	4	4	4	4	1	0	0	0	0	1	0	0	0	0	0	0	0	0	0	0	0	0	0	1	0	0	0	0	0	0	0	1.555	64.4	26.6333	0	270	270
0	22.8693	0	7	2	9	8	1	8	2	8	3	8	1	3		4	1	3	0	0	2	0	0	0	3	0	0	0	0	0	0	0	0	0	0	0	0	0	0	0	0	0	0	1.584	49	19.5293	0	1320	1320
0	22.987	0	12															0	0	0	0	0	0	0	0	0	0	0	0	0	0	0	0	0	0	0	0	0	0	0	0	0	0	1.588	73.8	29.2655	30	1320	1350
0	22.8802	0	9	4	9	9	4	1	6	1	4	9	2	2	3	2	9	3	0	0	0	2	3	0	0	0	0	0	0	3	0	3	0	0	0	1	0	0	0	0	0	0	0	1.692	51.2	17.8842	0	1640	1640
0	22.8994	0	11	3	9	8	2	1	5	1	4	9	5	3	3	3	1	3	1	0	0	0	1	0	0	0	0	0	3	0	0	0	3	2	0	2	0	0	0	0	0	3	0	1.554	66.5	27.5372	0	570	570
0	22.7707	0	10	3	9	1	3	9	6	1	4	9	5	3	3	3	1	3	1	0	0	0	1	0	0	0	0	0	1	0	1	0	1	0	0	0	0	0	0	1	0	0	0	1.6	69.6	27.1875	0	810	810
0	22.976	0	7	5	9	1	5	3	4	2	5	1	5	3	5	3	9	3	0	0	1	0	0	0	0	0	0	3	3	0	0	0	3	0	0	0	0	0	1	0	0	0	0	1.638	65.6	24.4498	0	1920	1920
0	22.7734	0	7	2	8	7	2	8	6	1	3	9	4	2	2	2	1	0	0	0	0	0	3	0	0	0	0	1	0	0	0	0	0	0	0	1	0	0	0	0	0	1	0	1.69	78.4	27.45	0	780	780
0	23.4798	0	8	4	1	9	4	9	7	1	9	1	4	3	3	3	1	3	2	3	3	2	0	0	0	0	0	0	0	0	0	3	0	0	0	0	0	0	0	0	0	0	0	1.567	66.9	27.2451	0	3600	3600
0	22.82	0	3	5	7	1	4	9	5	1	8	9	7	5	5	6	9	0	0	3	0	0	0	0	0	0	0	3	3	0	0	0	0	0	0	0	3	0	0	0	0	3	0	1.685	88.6	31.2057	0	210	210
0	23.0746	0	9	3	1	9	3	2	9	1	4	9	3	4	3	4	1	0	0	1	0	2	0	0	0	0	0	0	0	0	1	0	0	0	0	0	0	0	0	0	0	1	0	1.48	44.9	20.4985	0	880	880
0	22.7488	0	11	3	8	9	3	1	5	1	3	9	3	3	3	3	1	1	1	0	0	0	0	0	2	0	0	0	0	0	0	0	0	0	0	2	0	0	0	0	0	3	0	1.48	51.7	23.603	0	480	480
0	22.8693	0	8	3	9	9	6		5	1	4	8	4	2	2	4	1	0	0	0	0	0	0	0	0	0	0	0	1	0	0	1	1	0	0	0	0	0	0	0	0	0	0	1.686	72.3	25.4345	0	1050	1050
0	22.7515	0	11	5	1	9	4	9	5	1	5	9	7	5	5	5	1	3	1	0	0	0	0	0	0	0	0	0	0	0	0	1	0	0	0	2	0	0	1	0	0	0	0	1.563	96.4	39.4602	0	765	765
0	23.0171	0	12	4	1	9	4	1	5	1	4	9	8	4	4	4	9	3	0	1	1	0	0	0	0	0	0	0	1	0	0	0	0	0	0	0	0	0	0	0	0	0	0	1.596	69.8	27.4025	0	60	60
0	22.8255	0	12	6	9	2	4	1	6	1	4	9	9	5	6	3	9	3	2	0	1	3	0	0	0	0	0	0	3	0	0	0	0	1	0	0	0	0	0	3	0	0	0	1.634	77.8	29.1391	0	180	180
0	22.8036	0	9	4	9	1	3	2	6	2	4	8	4	3	9	4	1	3	0	0	0	0	3	3	1	0	3	0	1	0	1	1	3	3	3	1	0	3	0	3	3	0	0	1.542	67	28.1777	0	200	200
0	23.0007	0	10	3	9	8	5	1	7	1	5	9	7	3	3	7	9	0	0	0	0	2	0	0	0	0	0	0	0	0	0	2	0	0	0	3	0	0	0	0	0	1	0	1.533	63.3	26.9352	0	300	300
0	22.8227	0	10	4	9	2	2	1	4	1	2	9	4	3	3	3	1	1	1	1	0	0	2	0	0	0	0	1	1	0	0	0	1	1	0	1	0	0	0	0	1	0	0	1.562	63.2	25.9033	0	360	360
0	22.8008	0	12	3	9	9	4	1	9	1	3	9	4	3	5	5	1	3	0	0	0	0	2	0	2	0	0	2	2	0	0	0	0	2	0	1	1	0	1	2	1	0	0	1.715	55.5	18.8697	0	920	920
0	22.987	0	10	6	1	9	5	1	3	1	6	9	6	5	5	5	9	0	0	0	0	0	2	0	0	0	0	0	0	0	0	3	0	0	0	3	0	0	0	0	0	0	0	1.541	68	28.6354	0	300	300
0	23.0527	0	13	4	9	9	8	1	5	1	3	9	4	3	3	3		3	0	0	0	1	1	0	0	0	0	0	1	0	0	1	0	1	0	0	0	0	0	1	0	0	0	1.591	72.9	28.7996	0	370	370
0	22.8145	0	13	3	9	1	4	9	4	9	5	9	8	3	3	3	1	3	1	0	2	0	0	0	0	0	0	2	1	0	2	1	0	2	0	1	0	0	0	2	0	0	0	1.661	97	35.1587	0	450	450
0	23.499	0	13	5	9	9	4	1	4	1	5	9	5	5	5	5	1	3	0	0	0	0	1	1	2	0	0	1	1	0	0	0	1	0	0	1	0	0	3	1	0	0	0	1.54	74.5	31.4134	300	75	375
0	22.7351	0	6	4	1	9	5	9	8	1	4	9	2	5	4	6	9	0	0	1	0	3	3	0	0	0	3	0	0	3	2	3	0	0	0	0	1	0	0	0	0	3	0	1.528	41.3	17.689	0	840	840
0	22.8583	0	10	4	1	9	6	9	4	1	9	1	4	6	6	2	9	1	3	0	0	0	0	0	0	2	0	0	0	0	0	0	0	0	0	0	0	0	0	0	0	2	0	1.459	49.2	23.1129	540	160	700
0	22.5216	0	9	3	9	9	7	1	8	1	6	1	5	3	2	2	1	1	2	0	1	0	2	0	2	0	2	0	2	0	1	0	0	2	0	1	2	0	2	2	3	0	0	1.514	50.5	22.0313	120	240	360
0	23.0856	0	11	3	9	8	7	1	2	9	3	8	7	5	5	5	1	0	0	0	0	0	0	0	0	0	0	0	0	0	0	0	0	0	0	0	0	0	0	0	0	0	0	1.59	83.9	33.187	0	480	480
0	22.883	0	8	3	9	1	3	1	4	9	9	6	4	3	3	3	9	3	1	1	0	2	3	1	0	0	0	2	1	2	1	0	0	0	0	1	0	3	0	0	1	0	0	1.688	75.3	26.4271	0	1020	1020
0	22.8172	0	11	4	9	9	4	9	1	9	3	9	4	2	2	2	1	3	0	0	0	2	3	0	0	0	0	0	0	0	0	0	0	0	0	3	0	0	0	0	0	0	0	1.569	74.1	30.1004	0	100	100
0	22.8172	0	10	5	1	9	5	9	8	1	5	9	2	3	3	3	1	1	0	3	1	0	0	0	1	0	0	0	0	2	2	2	0	0	0	0	2	0	0	0	0	2	0	1.662	46.3	16.7617	0	1050	1050
0	22.8693	0	13	5	2	8	3	8	3	1	4	1	4	2	4	4	1	0	0	0	0	0	0	0	0	0	0	0	0	0	0	0	0	0	0	3	0	3	0	0	0	0	0	1.701	67.7	23.3981	0	180	180
0	23.1814	0	11	4	8	8	4	9	6	2	4	9	4	4	6	3	1	1	0	2	0	0	0	0	0	0	0	0	0	0	0	1	0	0	0	0	0	0	0	0	0	0	0	1.444	57.8	27.72	0	225	225
0	22.8118	0	7	4	1	8	1	8	9	1	5	8	3	4	4	5	1	0	0	0	0	0	0	0	0	0	0	0	0	0	0	0	0	0	1	0	0	0	0	0	0	0	0	1.577	49.8	20.0247	0	230	230
0	22.9377	0	12	4	8	1	4	1	4	1	4	8	6	4	4	4	9	2	0	0	0	0	0	0	0	0	0	0	3	0	0	0	0	0	0	1	0	0	0	0	0	0	0	1.614	99.8	38.311	0	765	765
0	23.1841	0	7	3	9	8	4	9	6	1	3	9	3	3	3	3	1	3	0	0	0	0	0	1	1	0	0	0	0	0	0	0	1	0	0	3	2	1	0	0	0	0	0	1.558	51.4	21.1752	210	540	750
0	23.0089	0	8	4	9	1	4	9	5	1	4	1	2	3	5	5	9	1	0	1	1	0	0	0	2	0	0	0	0	3	0	0	0	0	0	0	3	3	2	0	0	3	0	1.632	50.3	18.8855	240	420	660
0	22.5243	0	7	4	9	9	9	1	9	1	3	9	5	4	4	4	1	3	0	0	0	0	0	0	0	0	0	0	2	0	2	0	0	0	0	0	0	0	0	0	0	0	0	1.567	61.4	25.0052	0	660	660
0	22.768	0	12	4	9	1	4	9	9	1	5	9	4	4	4	4	1	3	0	0	0	0	0	0	0	0	0	0	1	1	0	0	0	0	0	1	0	0	0	0	0	0	0	1.541	56.8	23.919	0	0	0
0	22.8309	0	10	4	1	9	4	9	4	1	6	1	4	2	9	2	1	3	0	1	0	1	2	2	3	0	1	1	2	3	2	3	3	3	0	0	3	1	0	2	3	0	3	1.636	54.4	20.3251	0	90	90
0	23.1814	0	10	5	1	2	6	9	9	1	6	8	8	6	7	8	1	0	0	0	0	1	0	0	0	0	0	0	2	0	0	0	0	0	0	3	0	0	0	0	0	0	0	1.72	123.2	41.6441	0	4140	4140
0	22.82	0	8	4	9	2	5	1	9	1	8	1	5	4	5	5	1	0	0	0	0	0	0	0	0	0	0	0	0	0	0	0	0	0	0	0	0	0	0	0	0	0	0	1.633	75.4	28.2748	0	900	900
0	23.2964	0	10	1	9	8	4	2	7	1	8	1	7	3	3	2	1	3	2	0	1	0	0	0	0	0	0	3	0	0	0	0	0	0	0	0	1	0	0	0	0	3	0	1.602	99	38.5754	0	720	720
[truncated: 15 more columns]
